# Supplementary material for: Persistent Donor Cell Gene Expression among Human Induced Pluripotent Stem Cells Contributes to Differences with Human Embryonic Stem Cells
Source: PLoS One. 2010 Feb 1;5(2):e8975. doi: 10.1371/journal.pone.0008975 (PMC2813859; doi:10.1371/journal.pone.0008975)
Supplement: Table S1 — Functional analysis of the upregulated genes in (A) iPS-hFFib and hFFib; (B) iPS-hASC and hASC; (C) iPS-hNFib and hNFib and (D) iPS-hKT and hKT (0.18 MB XLS) [file pone.0008975.s005.xls]

## Sheet: S1-A
Table S1-A. Functional Analysis of the upregulated genes in iPS-hFFib and hFFib
Category	P-value	Molecules
Cellular Movement	3.03E-13-4.67E-03	LOX,TPM1,S100A6,CLDN11,CTGF,GDF15,TWIST1,CXCL1,NEXN,FAS,JUN,GADD45A,EDN1,SDC2,ANXA1,LGALS8,CXCL14,CAV1,SERPINE1,CDH13,PLAT,PRNP,PAPPA,ERAP1,GREM1,PLAUR,AXL,SERPINE2,FGF1,COL1A1,NT5E,CNN1,CAT,CD44,CALD1,PLAU,CYR61,MAP2,IL11,LGALS1,COL7A1
Cancer	2.04E-10-4.71E-03	CTGF,RIT1,CXCL1,LGALS8,CXCL14,ERLIN2,CAV1,SERPINE1,CDH13,PAPPA,MFAP5,AIG1,RCAN1,PRSS23,BHLHE40,TRIM22,MAP2,CYR61,COL7A1,TPM1,LOX,S100A6,CLDN11,GADD45B,PHLDA2,GDF15,ACTA2,ANTXR1,TWIST1,IGFBP7,GLIPR1,FAS,CTSF,COL1A2,JUN,GADD45A,EDN1,SDC2,PLK2,TM2D1,ANXA1,IFI6,PRNP,PLAT,PSMB9,COL12A1,GREM1,ANXA4,PLAUR,AXL,STXBP6,CYP1B1,SERPINE2,FGF1,EMP1,COL1A1,CNN1,CAT,CD44,CALD1,PLAU,QPCT (includes EG:25797),LGALS…
Cell Death	4.84E-10-4.37E-03	TPM1,S100A6,GADD45B,CTGF,PHLDA2,GDF15,ANTXR1,TWIST1,CXCL1,IGFBP7,GLIPR1,FAS,JUN,EDN1,GADD45A,SDC2,PLK2,ANXA1,TM2D1,LGALS8,CAV1,IFI6,NSMCE1,SERPINE1,CDH13,PLAT,PRNP,EMP3,ANXA4,LMNA,PLAUR,CDC42EP3,GREM1,RPS27L (includes EG:51065),AXL,CYP1B1,RCAN1,SERPINE2,FGF1,EMP1,BHLHE40,CAT,CD44,PLAU,CYR61,LGALS1,IL11
Reproductive System Disease	4.84E-10-4.67E-03	LOX,TPM1,CLDN11,GADD45B,CTGF,PHLDA2,ACTA2,GDF15,CXCL1,TWIST1,IGFBP7,GLIPR1,FAS,CTSF,JUN,EDN1,GADD45A,SDC2,ANXA1,PLK2,CXCL14,ERLIN2,CAV1,CAV2,SERPINE1,CDH13,PRNP,PSMB9,PAPPA,GREM1,PLAUR,STXBP6,AIG1,CYP1B1,FGF1,COL1A1,BHLHE40,CAT,CD44,PHACTR2,PLAU,CYR61,IL11,LGALS1
Gastrointestinal Disease	4.47E-09-4.37E-03	CTGF,ACTA2,GDF15,ANTXR1,TWIST1,CXCL1,IGFBP7,GLIPR1,FAS,COL1A2,JUN,GADD45A,EDN1,SDC2,ANXA1,LGALS8,CAV1,SERPINE1,PRNP,PLAT,PAPPA,GREM1,PLAUR,ANXA4,AXL,STXBP6,CYP1B1,FGF1,SERPINE2,EMP1,COL1A1,PRSS23,NT5E,CD44,CALD1,PLAU,CYR61,LGALS1,QPCT (includes EG:25797)
Cellular Growth and Proliferation	5.62E-09-4.71E-03	EIF1AY,CTGF,CXCL1,CAV1,SERPINE1,CDH13,PAPPA,ERAP1,LMNA,MYOF,MAFF,RCAN1,BHLHE40,TRIM22,CYR61,LOX,TPM1,CLDN11,S100A6,GADD45B,PHLDA2,GDF15,IGFBP7,FAS,CTSF,COL1A2,JUN,GADD45A,EDN1,SDC2,ANXA1,PLK2,CAV2,PLAT,PRNP,EMP3,PLAUR,GREM1,AXL,SERPINE2,FGF1,EMP1,COL1A1,NT5E,CNN1,CAT,CD44,PLAU,IL11,LGALS1
Cell Cycle	5.02E-08-4.67E-03	TPM1,GADD45B,GDF15,IGFBP7,FAS,JUN,GADD45A,EDN1,SDC2,PLK2,CAV1,CDH13,PRNP,LMNA,PLAUR,AXL,RPS27L (includes EG:51065),FGF1,COL1A1,BHLHE40,CAT,CD44,PLAU,CYR61,LGALS1,IL11
Cardiovascular System Development and Function	5.52E-08-4.97E-03	LOX,CTGF,CXCL1,IGFBP7,FAS,COL1A2,JUN,EDN1,SDC2,ANXA1,CXCL14,CAV1,CAV2,SERPINE1,CDH13,PLAT,ERAP1,LMNA,PLAUR,MYOF,AXL,RCAN1,FGF1,WARS2,COL1A1,CAT,CD44,PLAU,CYR61
Cell Morphology	6.09E-07-4.57E-03	TPM1,LOX,RIT1,GDF15,ANTXR1,TWIST1,CXCL1,IGFBP7,FAS,COL1A2,JUN,EDN1,GADD45A,SDC2,ANXA1,LGALS8,CAV1,SERPINE1,CDH13,PLAT,LMNA,PLAUR,AXL,RCAN1,FGF1,COL1A1,FLNC,CAT,CD44,CALD1,PLAU,CYR61,SYTL2,LGALS1
Cellular Development	7.21E-07-4.97E-03	LOX,TPM1,S100A6,CTGF,GADD45B,GDF15,ANTXR1,CXCL1,TWIST1,IGFBP7,FAS,JUN,GADD45A,EDN1,PLK2,ANXA1,LGALS8,CAV1,SERPINE1,CDH13,PRNP,PLAT,LMNA,GREM1,PLAUR,AXL,MAFF,RCAN1,FGF1,COL1A1,FLNC,BHLHE40,CAT,CD44,PLAU,CYR61,LGALS1,IL11
Connective Tissue Development and Function	7.21E-07-3.08E-03	LOX,TPM1,S100A6,CTGF,GADD45B,CXCL1,JUN,EDN1,GADD45A,PLK2,CAV1,SERPINE1,CDH13,GREM1,PLAUR,LMNA,FGF1,COL1A1,CAT,CD44,PLAU,CYR61,LGALS1,COL7A1,IL11
Cell-To-Cell Signaling and Interaction	8.73E-07-4.33E-03	LOX,CLDN11,CTGF,ACTA2,CXCL1,TWIST1,IGFBP7,FAS,EDN1,SDC2,ANXA1,LGALS8,CAV1,SERPINE1,CDH13,PLAT,PRNP,PSMB9,ERAP1,GREM1,PLAUR,AXL,RCAN1,FGF1,CAT,CD44,CALD1,PLAU,CYR61,IL11,COL7A1
Tissue Development	1.28E-06-3.08E-03	TPM1,CLDN11,GADD45B,CTGF,ACTA2,TWIST1,IGFBP7,FAS,JUN,EDN1,SDC2,ANXA1,LGALS8,CAV1,SERPINE1,CDH13,PLAT,GREM1,PLAUR,AXL,MYOF,RCAN1,FGF1,CAT,CD44,PLAU,CYR61,COL7A1,IL11
Hair and Skin Development and Function	1.76E-06-3.82E-03	CTGF,ANTXR1,PLAUR,FAS,FGF1,EMP1,COL1A1,SDC2,CAT,CAV1,PLAU,CYR61,COL7A1
Organ Morphology	1.76E-06-4.33E-03	TPM1,PLAUR,GREM1,LMNA,FAS,RCAN1,FGF1,JUN,CNN1,CAV1,PLAU,SERPINE1,CAV2,PLAT
Respiratory System Development and Function	1.76E-06-1.76E-06	CAV1,CAV2,FAS
Tissue Morphology	1.87E-06-3.68E-03	LOX,TPM1,CTGF,GDF15,ACTA2,CXCL1,IGFBP7,FAS,JUN,EDN1,ANXA1,LGALS8,CAV1,SERPINE1,CAV2,PLAT,PRNP,PLAUR,MYOF,RCAN1,FGF1,NT5E,FLNC,BHLHE40,CNN1,CAT,CD44,CALD1,PLAU,IL11
Cellular Assembly and Organization	2.32E-06-3.68E-03	TPM1,LOX,CTGF,PLAUR,AXL,FAS,FGF1,COL1A2,COL1A1,JUN,EDN1,FLNC,SDC2,LGALS8,CAT,CD44,CAV1,CALD1,PLAU,SERPINE1,MAP2,CYR61,CAV2,LGALS1
Organismal Injury and Abnormalities	3.19E-06-4.37E-03	PSMB9,ACTA2,CXCL1,LMNA,PLAUR,RCAN1,FAS,FGF1,SERPINE2,COL1A2,COL1A1,EDN1,FLNC,NT5E,ANXA1,CAT,CAV1,CD44,IFI6,PLAU,SERPINE1,IL11,PLAT
Neurological Disease	4.19E-06-4.52E-03	CTGF,CXCL1,FAS,JUN,GADD45A,EDN1,TM2D1,PLK2,IER5,CDH13,PLAT,PRNP,PSMB9,PLAUR,AXL,MAFF,AIG1,LMCD1,SERPINE2,FGF1,BHLHE40,CAT,CD44,PLAU,MAP2
Immune Cell Trafficking	4.83E-06-4.24E-03	CXCL1,PLAUR,GREM1,AXL,FAS,FGF1,COL1A1,EDN1,NT5E,ANXA1,CXCL14,CD44,PLAU,SERPINE1,IL11,PLAT,LGALS1,PRNP
Cellular Function and Maintenance	4.97E-06-2.42E-03	LOX,PLAUR,AXL,FAS,COL1A2,COL1A1,JUN,EDN1,FLNC,SDC2,ANXA1,CD44,CAV1,PLAU,SERPINE1,CAV2
Immunological Disease	7.75E-06-4.37E-03	LOX,GADD45B,ANTXR1,CXCL1,IGFBP7,HLA-DPA1,FAS,COL1A2,NTNG1,LHFP,JUN,GADD45A,TM2D1,ANXA1,CXCL14,LGALS8,RFTN1,ADAMTS5,CDH13,PLAT,PRNP,PSMB9,PAPPA,EFCAB2,PLAUR,AXL,MYOF,STXBP6,WARS2,MAMDC2,GLIPR2,BTN3A2,CAT,CD44,CALD1,ANO4,TRIM22,TRIM4,TAP2,COL7A1,LGALS1,IL11
Connective Tissue Disorders	8.57E-06-4.33E-03	LOX,GADD45B,ANTXR1,ACTA2,CXCL1,IGFBP7,HLA-DPA1,FAS,COL1A2,NTNG1,LHFP,TM2D1,LGALS8,CXCL14,CDH13,ADAMTS5,PLAT,PRNP,PSMB9,PAPPA,COL12A1,PLAUR,LMNA,MYOF,STXBP6,WARS2,COL1A1,GLIPR2,CD44,CALD1,PLAU,TAP2,COL7A1,LGALS1
Skeletal and Muscular System Development and Function	1.01E-05-4.67E-03	LOX,TPM1,GADD45B,CTGF,ACTA2,TWIST1,COL1A2,JUN,EDN1,ANXA1,PLK2,CAV1,SERPINE1,CDH13,PLAT,PAPPA,COL12A1,LMNA,PLAUR,GREM1,MYOF,RCAN1,FGF1,COL1A1,FLNC,CNN1,CD44,CALD1,PLAU,CYR61,IL11
Genetic Disorder	1.41E-05-4.33E-03	CTGF,CXCL1,MSRB3 (includes EG:253827),LGALS8,CXCL14,CAV1,RFTN1,SERPINE1,ADAMTS5,CDH13,PAPPA,ERAP1,LMNA,MYOF,MAFF,AIG1,RCAN1,LMCD1,MAMDC2,PRSS23,BHLHE40,BTN3A2,CYR61,MAP2,TAP2,COL7A1,TPM1,LOX,S100A6,CLDN11,GADD45B,ACTA2,ANTXR1,GDF15,TWIST1,CSRP1,C1ORF58,IGFBP7,MRGPRF,HLA-DPA1,FAS,CTSF,COL1A2,LHFP,NTNG1,JUN,GADD45A,SDC2,PLK2,TM2D1,IFI6,TOX2,NSMCE1,IER5,PRNP,PLAT,PSMB9,COL12A1,EFCAB2,CDC42EP3,GREM1,…
Embryonic Development	1.52E-05-7.02E-04	JUN,SDC2,CAT,CAV1,GREM1,PLAUR,SERPINE1,IL11
Cardiovascular Disease	1.59E-05-4.37E-03	TPM1,S100A6,CTGF,ACTA2,C1ORF58,FAS,CTSF,MSRB3 (includes EG:253827),JUN,EDN1,ANXA1,CAV1,TOX2,SERPINE1,NSMCE1,CDH13,PRNP,PLAT,PAPPA,COL12A1,ANXA4,LMNA,AXL,MYOF,RCAN1,SERPINE2,FGF1,WARS2,MAMDC2,GLIPR2,NT5E,CAT,CD44,ANO4,PHACTR2,PLAU,IL11
Hematological Disease	1.59E-05-4.71E-03	GADD45B,CTGF,ANXA4,AXL,NEXN,FAS,SERPINE2,JUN,GADD45A,EDN1,CNN1,ANXA1,CXCL14,CAT,CAV1,CD44,CALD1,PLAU,SERPINE1,IL11,PLAT
Tumor Morphology	2.05E-05-2.85E-03	TPM1,GDF15,TWIST1,PLAUR,FAS,FGF1,COL1A2,COL1A1,GADD45A,SDC2,CNN1,CD44,CAV1,PLAU,SERPINE1,PLAT
Ophthalmic Disease	2.41E-05-1.13E-03	PLAUR,PLAU,PRNP,FGF1
Skeletal and Muscular Disorders	3.25E-05-4.52E-03	CTGF,CXCL1,CXCL14,CAV1,SERPINE1,ADAMTS5,CDH13,PAPPA,LMNA,MYOF,AIG1,MAFF,RCAN1,LMCD1,BHLHE40,MAP2,TAP2,LOX,GADD45B,ACTA2,ANTXR1,TWIST1,IGFBP7,HLA-DPA1,FAS,COL1A2,NTNG1,LHFP,JUN,EDN1,GADD45A,SDC2,TM2D1,PLK2,IER5,PRNP,PLAT,PSMB9,CDC42EP3,PLAUR,STXBP6,SERPINE2,WARS2,GLIPR2,COL1A1,CAT,CD44,CALD1,PHACTR2,PLAU,IL11,LGALS1
Hematological System Development and Function	4.36E-05-4.33E-03	CXCL1,PLAUR,AXL,FAS,FGF1,COL1A1,EDN1,NT5E,ANXA1,CXCL14,CD44,PLAU,SERPINE1,IL11,LGALS1,PRNP,PLAT
Inflammatory Response	4.36E-05-4.24E-03	CXCL1,PLAUR,AXL,FAS,FGF1,EDN1,ANXA1,CXCL14,CD44,PLAU,SERPINE1,PLAT,IL11
Digestive System Development and Function	5.87E-05-4.33E-03	JUN,PLAU,FAS,PLAT
Hepatic System Development and Function	5.87E-05-4.33E-03	JUN,CD44,PLAU,FAS,PLAT,LGALS1
Organ Development	5.87E-05-3.82E-03	EMP1,COL1A1,CTGF,PLAU,PLAT,COL7A1
Hematopoiesis	6.38E-05-6.38E-05	EDN1,ANXA1,CXCL14,CXCL1,CD44,PLAUR,LGALS1
Respiratory Disease	6.79E-05-2.32E-03	LOX,GADD45B,GADD45A,NT5E,LGALS8,CAV1,PLAU,CYR61,GLIPR1,FAS
Dermatological Diseases and Conditions	6.99E-05-4.33E-03	LOX,COL12A1,GDF15,ACTA2,TWIST1,LMNA,PLAUR,FAS,COL1A2,COL1A1,JUN,GADD45A,EDN1,CAT,PLAU,LGALS1,PLAT,COL7A1
Endocrine System Disorders	9.27E-05-3.64E-03	LOX,PSMB9,S100A6,PAPPA,EFCAB2,PLAUR,IGFBP7,HLA-DPA1,COL1A2,MAMDC2,LHFP,GLIPR2,BTN3A2,LGALS8,CD44,ANO4,RFTN1,PLAU,CDH13,ADAMTS5,TAP2,TRIM4,PLAT
Inflammatory Disease	1.56E-04-4.16E-03	LOX,GADD45B,ANTXR1,ACTA2,CXCL1,TWIST1,IGFBP7,FAS,HLA-DPA1,NTNG1,LHFP,JUN,GADD45A,TM2D1,CXCL14,IFI6,SERPINE1,CDH13,ADAMTS5,PLAT,PRNP,PSMB9,PAPPA,LMNA,PLAUR,MYOF,STXBP6,SERPINE2,WARS2,GLIPR2,CAT,CD44,CALD1,ANO4,PHACTR2,PLAU,TAP2,QPCT (includes EG:25797),LGALS1
Cellular Compromise	1.75E-04-1.2E-03	JUN,CTGF,PRSS23,ANXA1,CAV1,CD44,PLAUR,PLAU,FAS,PLAT,PRNP,FGF1
Endocrine System Development and Function	1.75E-04-1.75E-04	PLAU,PLAT
Nervous System Development and Function	1.75E-04-4.67E-03	CLDN11,CAT,CXCL1,PLAU,SERPINE2,PLAT,PRNP
Post-Translational Modification	1.75E-04-1.75E-04	ERAP1,FAS
Renal and Urological Disease	1.75E-04-4.09E-03	CTGF,CAT,PLAU,SERPINE1,FAS,PLAT
Renal and Urological System Development and Function	1.75E-04-3.82E-03	JUN,SDC2,FLNC,ANTXR1,CAV1,PLAUR,PLAU,AXL,CAV2,FAS,PLAT,PRNP
Free Radical Scavenging	1.87E-04-1.87E-04	JUN,EDN1,CAT,FAS,PRNP
Molecular Transport	1.87E-04-3.08E-03	RGS20,CXCL1,PLAUR,FAS,JUN,EDN1,ANXA1,CAT,CAV1,CD44,RFTN1,PRNP,LGALS1
Carbohydrate Metabolism	3.32E-04-2.54E-03	EDN1,CXCL14,CAT,LGALS8,CD44,PLAUR,PLAU,SERPINE1,FAS,PRNP,FGF1,LGALS1
Hepatic System Disease	3.32E-04-4.37E-03	COL1A2,COL1A1,NT5E,CXCL1,CD44,FAS
Lipid Metabolism	3.32E-04-4.97E-03	CH25H,EDN1,LGALS8,CAV1,FAS,FGF1,LGALS1
Small Molecule Biochemistry	3.32E-04-4.97E-03	CH25H,EDN1,LGALS8,CAV1,CD44,FAS,PRNP,FGF1,LGALS1
Gene Expression	4.58E-04-4.97E-03	LOX,JUN,EDN1,CD44,LMNA,PLAU,FAS,CYP1B1,LMCD1,FGF1,LGALS1
Developmental Disorder	7.02E-04-1.2E-03	COL1A2,COL1A1,TPM1,CAV1,RCAN1
Reproductive System Development and Function	1.13E-03-4.33E-03	LGALS8,PLAUR,PLAU,SERPINE1
Cell-mediated Immune Response	1.59E-03-1.59E-03	CD44,FAS
Lymphoid Tissue Structure and Development	1.59E-03-2.54E-03	PAPPA,CD44,PLAU,IL11
Cell Signaling	1.69E-03-1.69E-03	RGS20,EDN1,ANXA1,CXCL1,CD44,PLAUR,RFTN1,FAS,LGALS1
Vitamin and Mineral Metabolism	1.69E-03-1.69E-03	RGS20,EDN1,ANXA1,CXCL1,CD44,PLAUR,RFTN1,FAS,LGALS1
DNA Replication, Recombination, and Repair	2.04E-03-2.58E-03	JUN,EDN1,LGALS8,CAT,CAV1,GREM1,CYR61,FAS,FGF1,LGALS1,PRNP
Antigen Presentation	2.42E-03-2.42E-03	PLAU,FAS,FGF1
Drug Metabolism	2.54E-03-2.54E-03	PRNP,FGF1
Infectious Disease	2.54E-03-2.54E-03	AXL,FAS
Metabolic Disease	3.64E-03-3.64E-03	PSMB9,PAPPA,EFCAB2,IGFBP7,HLA-DPA1,COL1A2,MAMDC2,LHFP,GLIPR2,BTN3A2,LGALS8,CD44,ANO4,RFTN1,CDH13,ADAMTS5,TAP2,TRIM4

## Sheet: S1-B
Table S1-B. Functional Analysis of the upregulated genes in iPS-hASC and hASC
Category	P-value	Molecules
Cellular Development	8.38E-07-2.36E-02	JAK1,LGALS3,HSPB2,SKI,S100A4,MSX1,PDPK1,FNDC3B,JMJD6,FHL2,JUB,NRN1,DNASE2,LMO4,RRAS,LMNA,MAFF,RALBP1,INHBA,IFRD1,METRN,RUNX1T1,SMARCA2,MIB1,SNAI2,IGFBP3,WASF2,TNFAIP6,ENC1,S100A6,BDNF,CDC42EP5,GDF15,PLEKHO1,TNFRSF12A,LIPA,HMOX1,PALLD,CLEC11A,BRD4,MAGEH1,EGFR,EPC1,TBX3,AP3D1,ZIC1,GNAQ,TRIB3,IGF2R,COL1A1,SREBF1,CAT,DKK1,CXCL2,NUP98
Cell Death	8.51E-06-2.36E-02	LGALS3,JAK1,HSPB2,SKI,S100A4,MSX1,PDPK1,DNAJC15,JMJD6,FHL2,CCT5,BAG5,PEG3,DNASE2,NME5,RRAS,IFT57,LMNA,SDHC,ITPR1,RALBP1,INHBA,RUNX1T1,SMARCA2,MIB1,SNAI2,USE1,IGFBP3,HIST1H1C,S100A6,SRPX,BDNF,PHLDA2,GDF15,CES1 (includes EG:1066),TNFRSF12A,AQP3,HMOX1,CLEC11A,PALLD,MT1E,BRD4,IFI6,NSMCE1,MAGEH1,EGFR,CRLF1,TBX3,GNAQ,TRIB3,RPS27L (includes EG:51065),NFKBIZ,IGF2R,DPM3,CAT,PROCR,TSPO,CBX4,DKK1,CXCL2
Cellular Growth and Proliferation	5.02E-05-2.36E-02	EIF1AY,COL14A1,LGALS3,JAK1,INSIG1,HSPB2,SKI,S100A4,MSX1,PDPK1,LGMN,FHL2,CRIP1,JUB,CCT5,IFI30,NRN1,PEG3,TSPAN5,H19,LMNA,ITPR1,RALBP1,MAFF,INHBA,RUNX1T1,SMARCA2,SNAI2,IGFBP3,WASF2,TNFAIP6,TFPI,ENC1,S100A6,BDNF,PHLDA2,PSMB10,GDF15,CDH11,PLEKHO1,CTSF,TNFRSF12A,HMOX1,LIPA,CLEC11A,MT1E,BRD4,MEG3 (includes EG:55384),SLC30A1,EGFR,TACSTD2,EPC1,CRLF1,TBX3,ZIC1,GNAQ,CKLF,IGF2R,SHB,COL1A1,SREBF1,CAT,TSPO,DKK…
Cancer	1.26E-04-2.36E-02	LGALS3,JAK1,INSIG1,HSPB2,ASS1,SKI,MSX1,S100A4,PDPK1,DNAJC15,HAPLN1,FHL2,CRIP1,MPHOSPH8,CCT5,IFI30,NRN1,PEG3,H19,LMO4,RRAS,SDHC,ITPR1,RALBP1,INHBA,RUNX1T1,SMARCA2,MIB1,SNAI2,IGFBP3,WASF2,TFPI,ENC1,COL3A1,S100A6,SRPX,BDNF,PHLDA2,GDF15,CES1 (includes EG:1066),CDH11,CTSF,TNFRSF12A,AQP3,HMOX1,CLEC11A,SLC16A3,PALLD,MT1E,MEG3 (includes EG:55384),IFI6,EGFR,TACSTD2,PSMB9,TBX3,COTL1,PDLIM2,NFKBIZ,STXBP6,IG…
Gastrointestinal Disease	1.26E-04-1.19E-02	LGALS3,SRPX,INSIG1,GDF15,S100A4,MSX1,PDPK1,STXBP6,HMOX1,AQP3,SLC16A3,CRIP1,CCT5,DKK1,TFPI,NRN1,ENC1,PEG3,QPCT (includes EG:25797),COL3A1,EGFR
Neurological Disease	1.52E-04-2.36E-02	PSMB9,S100A6,SRPX,BDNF,MSX1,MEIS2,PDPK1,MT1M,ITPR1,MAFF,INHBA,LMCD1,AP1S1,FAM173A,HMOX1,STOM,MT1E,CAT,ANKRD11,IGFBP3,CCT5,TSPO,DKK1,EGFR
Skeletal and Muscular System Development and Function	1.53E-04-2.36E-02	FHL1,JAK1,LGALS3,HSPB2,SKI,MSX1,PDPK1,PLEKHO1,TNFRSF12A,HMOX1,FHL2,PROS1,EGFR,PEG3,EPC1,LMO4,TBX3,GNAQ,LMNA,TRIB3,RALBP1,INHBA,IFRD1,IGFBP3,DKK1
Organismal Development	3.22E-04-2.36E-02	HIST1H1C,LGALS3,BDNF,SKI,MSX1,PDPK1,PLEKHO1,TNFRSF12A,HMOX1,MT1E,BRD4,SLC30A1,EGFR,H19,TBX3,GNAQ,LMNA,IGF2R,MAFF,INHBA,IFRD1,SMARCA2,MIB1,SNAI2,IGFBP3,DKK1,WASF2,NUP98,ENC1
Cellular Compromise	3.6E-04-2.36E-02	HMOX1,MT1E,RRAS,BDNF,HSPB2,CAT,GNAQ,S100A4,ITPR1,GOPC
Renal and Urological Disease	4.3E-04-2.36E-02	LGALS3,MT1E,DPM3,SREBF1,HSPB2,SNAI2,CAT,IGFBP3,SDHC,TRIB3,ITPR1,EGFR
Hematological System Development and Function	6.98E-04-2.36E-02	LGALS3,DNASE2,JAK1,BDNF,AP3D1,GNAQ,PDPK1,IGF2R,RALBP1,INHBA,TNFRSF12A,JMJD6,PALLD,CLEC11A,RUNX1T1,PROS1,SNAI2,PROCR,WASF2,DKK1,CXCL2,TFPI,NUP98,EGFR
Hematopoiesis	6.98E-04-2.36E-02	PALLD,CLEC11A,DNASE2,RUNX1T1,BDNF,PDPK1,DKK1,WASF2,NUP98,INHBA,TNFRSF12A,EGFR
Organ Development	8.27E-04-2.36E-02	LGALS3,TBX3,BDNF,IFT57,ZIC1,MSX1,GNAQ,PDPK1,ITPR1,CDH11,INHBA,JMJD6,MIB1,SREBF1,DKK1,TNFAIP6,COL3A1,EGFR
Organ Morphology	8.27E-04-2.36E-02	LGALS3,SREBF1,MIB1,TBX3,BDNF,IFT57,ZIC1,MSX1,PDPK1,DKK1,TNFAIP6,INHBA
Renal and Urological System Development and Function	8.27E-04-1.19E-02	LGALS3,SREBF1,PDPK1
Reproductive System Development and Function	8.27E-04-2.36E-02	AQP3,TBX3,TNFAIP6,INHBA,EGFR
Cellular Movement	9.24E-04-2.36E-02	CYTH2,JAK1,LGALS3,BDNF,GDF15,SKI,S100A4,PDPK1,TNFRSF12A,CLEC11A,PALLD,FHL2,LGMN,JUB,EGFR,RRAS,CKLF,PDLIM2,IGF2R,RALBP1,INHBA,COL1A1,SNAI2,CAT,PROCR,IGFBP3,WASF2,CXCL2,TFPI
Connective Tissue Development and Function	1.37E-03-2.36E-02	S100A6,LGALS3,HSPB2,MSX1,LMNA,INHBA,CDH11,COL1A1,FHL2,SREBF1,SMARCA2,LUM,BRD4,IGFBP3,DKK1,NRN1,EGFR
Cell-To-Cell Signaling and Interaction	1.61E-03-2.36E-02	CRLF1,LGALS3,JAK1,BDNF,PSMB10,HSPB2,S100A4,GNAQ,PDLIM2,INHBA,CDH11,TNFRSF12A,IFRD1,HMOX1,JUB,STC2,CAT,IGFBP3,DKK1,TULP4,CXCL2,EGFR
Developmental Disorder	1.61E-03-2.36E-02	S100A6,H19,LGALS3,LMO4,INSIG1,BDNF,TBX3,ZIC1,GNAQ,MSX1,LMNA,PDPK1,COL1A1,HMOX1,FHL2,SREBF1,SNAI2,CAT,EGFR
Genetic Disorder	1.61E-03-2.36E-02	LGALS3,SRPX,BDNF,INSIG1,ASS1,GDF15,MEIS2,MSX1,PDPK1,MT1M,FAM173A,HMOX1,AQP3,STOM,CRIP1,MT1E,PROS1,CCT5,EGFR,PSMB9,H19,TBX3,LMNA,ITPR1,NFKBIZ,STXBP6,MAFF,LMCD1,AP1S1,COL1A1,SNAI2,ANKRD11,TSPO,ENC1,COL3A1
Reproductive System Disease	1.61E-03-2.36E-02	LGALS3,PHLDA2,HSPB2,GDF15,SKI,MSX1,S100A4,PDPK1,CDH11,CTSF,SLC16A3,FHL2,LGMN,MPHOSPH8,CRIP1,CCT5,IFI30,TACSTD2,EGFR,PEG3,PSMB9,H19,RRAS,PDLIM2,ITPR1,NFKBIZ,STXBP6,INHBA,MIB1,CAT,IGFBP3
Cardiovascular System Development and Function	1.87E-03-2.36E-02	LGALS3,TBX3,BDNF,IFT57,MSX1,S100A4,GNAQ,PDPK1,IGF2R,INHBA,TNFRSF12A,COL1A1,JMJD6,HMOX1,MIB1,CAT,IGFBP3,WASF2,TFPI,COL3A1,EGFR
Embryonic Development	2.03E-03-2.36E-02	LMO4,TBX3,BDNF,SKI,MSX1,GNAQ,PDPK1,MAFF,INHBA,METRN,CLEC11A,PALLD,JUB,MIB1,SNAI2,CAT,BRD4,WASF2,DKK1,SLC30A1,EGFR
Hematological Disease	2.03E-03-2.06E-02	LGALS3,JAK1,BDNF,HSPB2,ITPR1,RALBP1,INHBA,HMOX1,SRPK2,CLEC11A,RUNX1T1,SMARCA2,SNAI2,PROS1,CAT,IGFBP3,NUP98,EGFR
Nervous System Development and Function	2.03E-03-2.36E-02	BDNF,GDF15,SKI,MSX1,S100A4,PDPK1,TNFRSF12A,HMOX1,PALLD,DOK4,PEG3,EGFR,CRLF1,LMO4,RRAS,ZIC1,GNAQ,LMNA,ITPR1,INHBA,IFRD1,METRN,MIB1,CAT,IGFBP3,DKK1,CXCL2
Tissue Morphology	2.03E-03-2.36E-02	H19,LGALS3,LMO4,BDNF,TBX3,PDPK1,INHBA,HMOX1,LIPA,MT1E,SREBF1,BRD4,EGFR
Cell Cycle	2.2E-03-2.36E-02	LGALS3,TBX3,GDF15,SKI,ZIC1,S100A4,LMNA,INHBA,COL1A1,HMOX1,RUNX1T1,MT1E,JUB,SMARCA2,PROS1,IGFBP3,BRD4,EGFR
Gene Expression	2.66E-03-2.36E-02	LGALS3,JAK1,LMO4,BDNF,SKI,MSX1,MEIS2,LMNA,INHBA,LMCD1,SPEN,FHL2,RUNX1T1,SMARCA2,SREBF1,SNAI2,IGFBP3,MEG3 (includes EG:55384),EGFR
Cellular Function and Maintenance	2.83E-03-1.19E-02	MT1E,JUB,BDNF,HSPB2,ITPR1,DKK1,NUP98,SLC30A1,CDH11,INHBA,EGFR
Hair and Skin Development and Function	2.83E-03-2.36E-02	FHL2,HSPB2,SKI,LUM,DKK1,CDH11,INHBA,EGFR
Immunological Disease	2.83E-03-2.36E-02	HMOX1,CLEC11A,LGALS3,JAK1,RUNX1T1,CAT,IGFBP3,ITPR1,NFKBIZ,NUP98
Lipid Metabolism	2.83E-03-2.36E-02	COTL1,GNAQ,LMNA,CES1 (includes EG:1066),INHBA,HMOX1,LIPA,CLEC11A,SREBF1,DPM3,CAT,TSPO,DKK1,EGFR
Metabolic Disease	2.83E-03-2.36E-02	SREBF1,ASS1,LMNA
Respiratory Disease	2.83E-03-2.36E-02	CTSZ (includes EG:1522),EIF1AY,HMOX1,HIST1H1C,SMARCA2,SKI,S100A4,HIST1H2AC,PDPK1,RALBP1,HIST1H2BK,EGFR
Small Molecule Biochemistry	2.83E-03-2.36E-02	CYTH2,COTL1,ASS1,GNAQ,ITPR1,CES1 (includes EG:1066),RALBP1,INHBA,LIPA,HMOX1,CLEC11A,MT1E,DPM3,SREBF1,CAT,TSPO,DKK1,TFPI,TNFAIP6,SLC30A1,EGFR
Tumor Morphology	2.83E-03-2.36E-02	MT1E,SNAI2,GDF15,SKI,S100A4,CXCL2,RALBP1,INHBA,EGFR
Tissue Development	3.74E-03-2.36E-02	LMO4,BDNF,TBX3,HSPB2,SKI,MSX1,PDPK1,PLEKHO1,CDH11,INHBA,IFRD1,HMOX1,LIPA,PALLD,LGMN,SREBF1,SNAI2,LUM,CAT,CXCL2,PEG3,EGFR
Behavior	5.92E-03-1.62E-02	CRLF1,JAK1,BDNF
Digestive System Development and Function	5.92E-03-1.62E-02	CRLF1,JAK1,BDNF,DKK1
Molecular Transport	5.92E-03-2.36E-02	CYTH2,AP3D1,GNAQ,ITPR1,CES1 (includes EG:1066),RALBP1,HMOX1,CLEC11A,MT1E,IGFBP3,TSPO,SLC30A1,EGFR
Nucleic Acid Metabolism	5.92E-03-2.36E-02	CYTH2,JUB,CAT,GNAQ,RALBP1,EGFR
Skeletal and Muscular Disorders	6.51E-03-2.36E-02	PSMB9,SRPX,BDNF,S100A4,MSX1,MEIS2,LMNA,MT1M,ITPR1,MAFF,INHBA,LMCD1,FAM173A,AP1S1,COL1A1,HMOX1,STOM,MT1E,ANKRD11,TSPO,TNFAIP6,COL3A1
Cell Morphology	1E-02-2.36E-02	LGALS3,BDNF,HSPB2,CDC42EP5,GDF15,S100A4,PDPK1,TNFRSF12A,AQP3,LIPA,PALLD,DOK4,JUB,BRD4,NRN1,EGFR,RRAS,GNAQ,RALBP1,INHBA,COL1A1,MIB1,SNAI2,CAT,IGFBP3,WASF2,CXCL2
Cellular Assembly and Organization	1E-02-2.36E-02	FHL1,CYTH2,LGALS3,RRAS,BDNF,GNAQ,S100A4,CSRP1,PDPK1,LMNA,CDH11,TNFRSF12A,PALLD,MT1E,DOK4,MIB1,JUB,CAT,WASF2,NUP98,EGFR
Connective Tissue Disorders	1E-02-2.36E-02	COL1A1,SREBF1,COL3A1
Dermatological Diseases and Conditions	1E-02-2.36E-02	COL1A1,COL14A1,NFKBIZ,CXCL2,EGFR,COL3A1
Endocrine System Development and Function	1E-02-1.19E-02	BDNF,TSPO,PDPK1,INHBA
Cell Signaling	1.01E-02-2.36E-02	JAK1,BDNF,RRAS,CDC42EP5,ZIC1,GNAQ,ITPR1,RALBP1,INHBA,JMJD6,HMOX1,DOK4,STC2,WASF2,RRAGC,EGFR,TACSTD2,COL3A1
Cardiovascular Disease	1.02E-02-2.14E-02	HMOX1,BDNF,INSIG1,CAT,GNAQ,PDPK1,LMNA,IGF2R
Amino Acid Metabolism	1.19E-02-2.36E-02	ASS1,CAT
Carbohydrate Metabolism	1.19E-02-2.36E-02	DPM3,CAT,TNFAIP6,TFPI,RALBP1
Cell-mediated Immune Response	1.19E-02-1.19E-02	RALBP1
DNA Replication, Recombination, and Repair	1.19E-02-2.36E-02	DNASE2,CAT,LMNA,NUP98
Drug Metabolism	1.19E-02-2.36E-02	CAT,TNFAIP6,CES1 (includes EG:1066),TFPI,RALBP1
Endocrine System Disorders	1.19E-02-1.19E-02	S100A4,INHBA
Hepatic System Disease	1.19E-02-2.36E-02	LGALS3,INSIG1,CAT,INHBA
Infection Mechanism	1.19E-02-1.19E-02	SMARCA2
Infectious Disease	1.19E-02-1.41E-02	CTSZ (includes EG:1522),EIF1AY,HIST1H1C,HIST1H2AC,IGF2R,HIST1H2BK
Inflammatory Disease	1.19E-02-1.19E-02	NFKBIZ
Lymphoid Tissue Structure and Development	1.19E-02-2.1E-02	CLEC11A,TFPI,EGFR
Ophthalmic Disease	1.19E-02-1.19E-02	BDNF
Organismal Functions	1.19E-02-1.19E-02	BDNF
Organismal Injury and Abnormalities	1.19E-02-2.36E-02	MT1E,BDNF,GNAQ,PDPK1,TNFAIP6,IGF2R,EGFR
Protein Trafficking	1.19E-02-1.19E-02	IGFBP3
Respiratory System Development and Function	1.19E-02-2.36E-02	HMOX1,HAPLN1,CXCL2
Visual System Development and Function	1.19E-02-1.19E-02	BDNF
Vitamin and Mineral Metabolism	1.19E-02-2.36E-02	BDNF,DPM3,GNAQ,ITPR1,EGFR
Organismal Survival	1.34E-02-1.88E-02	CRLF1,HIST1H1C,JAK1,LMO4,TBX3,ZIC1,SKI,GNAQ,PDPK1,IGF2R,MAFF,SPEN,HMOX1,HAPLN1,PALLD,MT1E,SREBF1,BRD4,WASF2,CXCL2
Dental Disease	1.69E-02-1.69E-02	MSX1,LMNA
Hepatic System Development and Function	1.69E-02-2.36E-02	MT1E,INHBA,TNFRSF12A
Immune Cell Trafficking	2.31E-02-2.36E-02	LGALS3,CXCL2
Free Radical Scavenging	2.36E-02-2.36E-02	HMOX1,CAT
Inflammatory Response	2.36E-02-2.36E-02	CXCL2
Post-Translational Modification	2.36E-02-2.36E-02	CAT

## Sheet: S1-C
Table S1-C. Functional Analysis of the upregulated genes in iPS-hNFib and hNFib
Category	P-value	Molecules
Cellular Growth and Proliferation	3.53E-14-5.72E-03	RAC2,PIK3R1,MSX1,NCK1,HOXA9,DYRK3,SKAP2,VEGFA,HOXB3,RB1,TBRG1 (includes EG:84897),FHL2,LUM,WNT5B,MAP3K2,ZFHX3,FOXP1,DCN,SSTR1,ANXA2,IGFBP5,ZEB1,MBD2,PITX2,SNAI2,CTSB,CFLAR,FOXF1,RXRA,FOXK1,HOXA1,CD99 (includes EG:4267),GADD45B,PTPN13,PHLDA2,LIG4,PDS5B,SLC1A3,ETFDH,IGFBP7,CDH11,USP3,ELF4,KLF9,CLEC11A,CD47,CCL2,GAS1,PDGFRA,NRD1,UBE2D3,CAV2,CASP8,CITED2,PLAT,IL11RA,SERTAD2,PLAGL1,HNRNPU,TNC,TBX3,CD5…
Cellular Movement	2.02E-11-4.85E-03	CDKN2A,HOXB2,RAC2,PIK3R1,ARPC5,NR2F2,MAP1B,S100A4,NCK1,PBK,HOXA9,PTEN,VEGFA,NR2F1,FHL2,DSTN,LGALS8,CXCL14,LAMB1,MYO10,WNT5B,S100A10,PAPPA,FST,PON2,DCN,IL6R,RGS4,IGFBP5,ANXA2,MBD2,BCAR3,PITX2,KLF4,RAP1A,PPIC,EFS,SDCBP,CXCR7,SNAI2,CD99L2,PAX3,CTSB,CAPN2,FOXF1,TFPI,CTTN,HOXA1,COL7A1,IL6ST,CD99 (includes EG:4267),ID2,LTBP2,RECK,SLC1A3,ADAM33,SLC16A4,CDH11,CD47,CLEC11A,CCL2,DKK3,TIMP1,ANXA1,NAV1,PDGFR…
Cancer	2.35E-11-5.62E-03	RAC2,ATXN1,ASS1,PIK3R1,ARPC5,MSX1,NCK1,HOXA9,DYRK3,VEGFA,HAPLN1,HOXB3,RB1,FHL2,LUM,LGALS8,EML1 (includes EG:2009),WNT5B,ZFHX3,FOXP1,DCN,SSTR1,ANXA2,IGFBP5,MBD2,ZEB1,PITX2,RAP1A,RAB31,MN1,SCP2,PPP2R3A (includes EG:5523),SNAI2,CTSB,CFLAR,FOXF1,RXRA,HOXA1,COL3A1,CD99 (includes EG:4267),LTBP2,GADD45B,FBXO7,NID2,PTPN13,PHLDA2,MXRA8,LIG4,PDS5B,SLC1A3,IGFBP7,GLIPR1,CDH11,KLF9,PLGLB2,CD47,CLEC11A,CCL2,GS…
Cell Death	5.12E-11-5.79E-03	RAC2,QKI,PIK3R1,ATXN1,MSX1,NCK1,HOXA9,DYRK3,VEGFA,RB1,FHL2,LGALS8,MAP3K2,NME5,FOXP1,DCN,IGFBP5,PPP2R3A (includes EG:5523),SCP2,SNAI2,CTSB,CFLAR,RXRA,HOXA1,AZI2,CD99 (includes EG:4267),GADD45B,PTPN13,PHLDA2,LIG4,SLC1A3,IGFBP7,GLIPR1,TANK,ELF4,CLEC11A,CD47,CCL2,ADK,GAS1,PDGFRA,ACSL4,FAIM,ALPK2,CASP8,RNF19A,CITED2,IL11RA,PLAT,PLAGL1,TNC,TBX3,REV3L,SOAT1,DLC1,F3,KITLG,LAMP2,ZEB2,CD44,PEA15,MAP3K8,CBX…
Gastrointestinal Disease	2.67E-09-5.62E-03	CDKN2A,PIK3R1,ARPC5,KLF6,S100A4,MSX1,PBK,HOXA9,PTEN,VEGFA,NR2F1,RB1,DSTN,LGALS8,S100A10,PAPPA,FST,IL6R,CDK6,SSTR1,RGS4,IGFBP5,ANXA2,MBD2,PITX2,KLF4,RAB31,TTC3,EFS,COL6A3,CXCR7,CTSB,FOXF1,TFPI,CTTN,COL3A1,ID2,SRPX,STMN2,FLRT2,ACTA2,IGFBP7,SLC16A4,C1ORF63,COL1A2,CCL2,TIMP1,ANXA1,GPR177,PDGFRA,GATA6,AKT3,HIST1H2BD,CASP8,PRNP,PLAT,SERTAD2,TNC,GLRX2,BGN,NQO1,OLFML3,REV3L,XPA,SERPINE2,KITLG,COL1A1,CRAB…
Cellular Development	6.52E-09-5.81E-03	HOXB2,CDKN2A,RAC2,QKI,BOC,IFI16,PIK3R1,MSX1,S100A4,NCK1,GATA2,HOXA9,DYRK3,PTEN,VEGFA,NR2F1,RB1,FHL2,LGALS8,WNT5B,ZFHX3,FST,FOXP1,NME5,EID1,DCN,IL6R,CDK6,RGS4,IGFBP5,ANXA2,MBD2,ZEB1,PITX2,RAP1A,KLF4,IFRD1,SNAI2,PAX3,CTSB,FOXF1,RXRA,SOCS5,CTTN,HOXA1,IL6ST,ID2,RAB1A,GADD45B,STMN2,NID2,LIG4,NUMB,SLC1A3,IGFBP7,CDKN2B,TCF12,ELF4,SOX9,CD47,CLEC11A,CCL2,TIMP1,ANXA1,GAS1,AKT3,GATA6,UBE2D3,CASP8,CITED2,MAG…
Developmental Disorder	7.33E-08-3.65E-03	PIK3R1,NR2F2,MAP1B,MSX1,SNX3,PTEN,VEGFA,RB1,FHL2,NUPR1,S100A10,RP2,FST,IL6R,RGS4,SSTR1,BACE1,PITX2,RAI1,SNAI2,PAX3,BBS7,CTSB,FOXF1,BACE2,RXRA,IL6ST,ID2,RAB1A,ARHGEF7,MAMLD1,RPS6KA3,COL1A2,SOX9,CCL2,TIMP1,GAS1,PDGFRA,ACSL4,GATA6,CITED2,TBX3,AP1S2,NQO1,SMAD6,REV3L,XPA,KITLG,COL1A1,ATP6AP2,NFIB,MAFB,WNT5A,GRIA3
Skeletal and Muscular System Development and Function	4.68E-07-5.81E-03	CDKN2A,RAC2,QKI,BOC,IFI16,PIK3R1,NR2F2,MSX1,HOXA9,PTEN,VEGFA,RB1,HOXB3,HAPLN1,FHL2,FOXP1,DCN,IL6R,CDK6,RGS4,IGFBP5,ZEB1,PITX2,KLF4,IFRD1,COL6A3,PAX3,CTSB,CAPN2,FOXF1,RXRA,FOXK1,IL6ST,ID2,RAB1A,IGFBP7,TCF12,SOX9,CCL2,ANXA1,GAS1,GATA6,CASP8,PLAT,TBX3,BGN,SMAD6,F3,KITLG,TRIO,CRABP2,CD44,MBNL1,DKK1,WNT5A,LGALS1
Cardiovascular System Development and Function	6.6E-07-5.75E-03	CDKN2A,QKI,PIK3R1,IFI16,NR2F2,MSX1,GATA2,PTEN,VEGFA,HOXB3,RB1,CXCL14,FOXP1,DCN,IFT57,RGS4,ANXA2,PITX2,PAX3,CTSB,CFLAR,FOXF1,RXRA,ELK3,COL3A1,ID2,RECK,COL1A2,COL5A1,SOX9,CD47,CCL2,TIMP1,GAS1,PDGFRA,GATA6,CASP8,CITED2,PLAT,TBX3,BGN,SMAD6,DLC1,F3,KITLG,COL1A1,CD44,SEMA3C,CASP7
Organ Development	6.6E-07-3.33E-03	CDKN2A,ID2,PHLDA2,MAP1B,NR2F2,SLC1A3,MSX1,MEIS2,NUMB,GATA2,HOXA9,PTEN,NR2F1,COL5A1,VEGFA,RB1,HOXB3,SOX9,CCL2,TIMP1,GAS1,PDGFRA,LAMB1,GATA6,CASP8,CITED2,WNT5B,IL11RA,FST,FOXP1,TBX3,DCN,IFT57,BCL3,IGFBP5,PITX2,DLC1,PAX3,SNAI2,NFIB,DKK1,CFLAR,FOXF1,SEMA3C,RXRA,CASP7,WNT5A,COL3A1
Cell Cycle	2.54E-06-5.81E-03	CDKN2A,ASXL1,IFI16,PIK3R1,KLF6,S100A4,GATA2,PTEN,VEGFA,RB1,TBRG1 (includes EG:84897),HOXB3,DSTN,POLK,ZFHX3,DCN,IL6R,CDK6,SSTR1,IGFBP5,ZEB1,PITX2,KLF4,SMARCA2,PPP2R3A (includes EG:5523),CAPN2,SPTAN1,RXRA,SOCS5,ID2,GADD45B,RPS6KA3,NUMB,IGFBP7,CDKN2B,ELF4,KLF9,SOX9,GAS1,PDGFRA,GATA6,NAMPT,UBE2D3,PRNP,RUNX3,PLAGL1,TNC,TBX3,BCL3,XPA,DEGS1,KITLG,COL1A1,CD44,PEA15,MAP3K8,A2M,LGALS1
Organismal Survival	2.97E-06-4.78E-03	CDKN2A,ATP2B1,IFI16,PIK3R1,NR2F2,PTEN,VEGFA,RB1,HAPLN1,FST,FOXP1,DCN,IL6R,CDK6,BACE1,IGFBP5,PITX2,PAX3,CTSB,CFLAR,BACE2,RXRA,ELK3,COL3A1,IL6ST,LTBP2,LIG4,RECK,SLC1A3,NUMB,UGCG,RNASEL,TCF12,COL5A1,KLF9,CLEC11A,CCL2,ANXA1,ADK,PDGFRA,AKT3,GATA6,CASP8,CITED2,PRNP,PLAT,IL11RA,TBX3,BGN,REV3L,KIFAP3,F3,FOLR1,KITLG,LAMP2,NFIA,CRABP2,PEA15,CD44,MAP3K8,DKK1
Cell Morphology	3E-06-5.72E-03	CDKN2A,RAC2,RIT1,PIK3R1,KLF6,NCK1,PBK,HOXA9,PTEN,VEGFA,NR2F1,RB1,DSTN,LUM,LGALS8,FST,DCN,IL6R,CDK6,RGS4,ANXA2,PITX2,RAP1A,KLF4,MN1,SDCBP,SMARCA2,SNAI2,PAX3,CAPN2,FOXF1,RXRA,CTTN,IL6ST,ID2,LTBP2,FBXO7,ARHGEF7,RECK,NUMB,IGFBP7,CDKN2B,COL1A2,COL5A1,SOX9,CD47,CCL2,DKK3,ANXA1,PDGFRA,AKT3,MLLT3,CASP8,CITED2,PLSCR1,PLAT,PLAGL1,TNC,TBX3,AP1S2,BCL3,KIFAP3,DLC1,KITLG,COL1A1,WIPF1,PMP22,TRIO,BNC1,CD44,YAF2,…
Tissue Development	3.5E-06-4.65E-03	CDKN2A,HOXB2,RAC2,IFI16,NR2F2,MAP1B,MSX1,PTEN,VEGFA,HOXB3,RB1,FHL2,LGALS8,LUM,LAMB1,MAP3K2,FST,FOXP1,DCN,IL6R,RGS4,BACE1,IGFBP5,ZEB1,PITX2,RAP1A,IFRD1,COL6A3,SNAI2,PAX3,CAPN2,CFLAR,FOXF1,TFPI,RXRA,HOXA1,COL7A1,IL6ST,CD99 (includes EG:4267),ID2,GADD45B,RECK,ARHGEF7,ACTA2,IGFBP7,TCF12,SOX9,CD47,CCL2,TIMP1,DKK3,ANXA1,GAS1,PDGFRA,GATA6,CASP8,CITED2,IL11RA,PLAT,RUNX3,TNC,TBX3,BGN,SMAD6,CD58,BCL3,REV3L…
Organismal Development	5.84E-06-4.33E-03	HOXB2,CDKN2A,QKI,PIK3R1,NR2F2,MSX1,HOXA9,PTEN,VEGFA,HOXB3,RB1,HAPLN1,FST,FOXP1,IL6R,CDK6,RGS4,IGFBP5,ZEB1,SNAI2,PAX3,CTSB,CAPN2,ELK3,FOXK1,HOXA1,IL6ST,ID2,LIG4,EVI5,SOX9,SLC30A7,CCL2,TIMP1,GAS1,GATA6,FAIM,CITED2,PRNP,TBX3,SMAD6,REV3L,F3,XPA,KITLG,ZEB2,CRABP2,DKK1,WNT5A
Connective Tissue Development and Function	6.24E-06-5.81E-03	CDKN2A,IL6ST,RAC2,GADD45B,LIG4,IFI16,PIK3R1,RPS6KA3,CDKN2B,HOXA9,PTEN,VEGFA,HOXB3,RB1,SOX9,FHL2,CCL2,TIMP1,LUM,GAS1,PDGFRA,NUPR1,CASP8,CITED2,WNT5B,BGN,DCN,IL6R,CDK6,SMAD6,IGFBP5,PITX2,F3,KITLG,SMARCA2,CD44,DKK1,WNT5A
Hematological System Development and Function	1.55E-05-5.81E-03	CDKN2A,RAC2,IFI16,PIK3R1,NCK1,GATA2,HOXA9,DYRK3,PTEN,VEGFA,HOXB3,RB1,LGALS8,MAP3K2,FST,DCN,IL6R,CDK6,ANXA2,MBD2,MALT1,KLF4,ITCH,EFS,SNAI2,CFLAR,RXRA,TFPI,SOCS5,IL6ST,ID2,LIG4,CDKN2B,TCF12,ELF4,KLF9,CLEC11A,CD47,CCL2,DKK3,TIMP1,DUSP10,CASP8,PRNP,PLSCR1,IL11RA,PLAT,RUNX3,NQO1,CD58,BCL3,SOAT1,F3,ISG15,KITLG,WIPF1,CD44,DKK1,MAFB,A2M,LGALS1
Gene Expression	1.63E-05-5.75E-03	CDKN2A,TCFL5,ATXN1,IFI16,NR2F2,KLF6,MSX1,GATA2,HOXA9,PTEN,NR2F1,VEGFA,RB1,FHL2,ZFHX3,FST,FOXP1,EID1,DCN,IL6R,IGFBP5,MALT1,ZEB1,MBD2,PITX2,RAP1A,KLF4,IFRD1,MN1,SMARCA2,PAX3,SNAI2,RAI1,AHCTF1,CFLAR,FOXF1,RXRA,ELK3,FOXK1,HOXA1,TAGLN2,IL6ST,AZI2,ID2,MEIS2,TCF12,TANK,KLF9,ELF4,SOX9,TIMP1,GATA6,TOX2,CASP8,BLZF1,CITED2,SLC20A1,RNF11,RUNX3,SERTAD2,PLAGL1,TBX3,SMAD6,BCL3,TMF1,COL1A1,NFIA,LRRFIP1,CRABP2,PE…
Immunological Disease	1.9E-05-5.2E-03	IL6ST,CDKN2A,CD99 (includes EG:4267),RAC2,GADD45B,PIK3R1,RNASEL,HOXA9,PTEN,VEGFA,CLEC11A,CD47,ANXA1,NAMPT,CASP8,MAP3K2,BGN,DCN,IL6R,NQO1,BCL3,KIFAP3,SOAT1,KITLG,CD44,CFLAR,CASP7,LGALS1
Reproductive System Disease	2.42E-05-3.88E-03	CDKN2A,IFI16,ASS1,S100A4,PBK,PTEN,VEGFA,RB1,FHL2,CXCL14,NUPR1,WNT5B,FST,DCN,CDK6,IGFBP5,ANXA2,BCAR3,MBD2,ZEB1,RASD1,PPIC,SDCBP,COL6A3,CXCR7,CTSB,CFLAR,RXRA,CTTN,HOXA1,COL7A1,ID2,PTPN13,PHLDA2,MXRA8,LIG4,PDS5B,UGCG,IGFBP7,RNASEL,GLIPR1,CDH11,CD47,CCL2,DKK3,TIMP1,ANXA1,PDGFRA,CASP8,PRNP,TNC,DST,NQO1,DLC1,XPA,KITLG,CRABP2,CD44,PEA15,CASP7,LGALS1
Hematological Disease	4.79E-05-5.38E-03	CDKN2A,RAC2,PIK3R1,NCK1,GATA2,HOXA9,PTEN,VEGFA,RB1,HOXB3,CXCL14,MAP3K2,DCN,IL6R,CDK6,ANXA2,SNAI2,CAPN2,CFLAR,RXRA,IL6ST,CD99 (includes EG:4267),GADD45B,TAX1BP1,STMN2,NID2,RNASEL,CDKN2B,CD47,CCL2,TIMP1,ANXA1,PDGFRA,AKT3,NAMPT,UBE2D3,MLLT3,CASP8,IL11RA,PLAT,NQO1,BCL3,KIFAP3,SOAT1,F3,KITLG,DLEU2,CD44,DKK1,CASP7,LGALS1
Connective Tissue Disorders	5.46E-05-4.85E-03	KIAA1618,QKI,PIK3R1,NCK1,C10ORF18,RB1,ANKRD28,LUM,ZBTB20,WNT5B,ZFHX3,DCN,PITX2,RAP1A,RAB31,MN1,SCP2,CTSB,CFLAR,COL3A1,GADD45B,FBXO7,ODF2L,IGFBP7,COL5A1,TANK,USP3,LHFP,CCL2,ADK,PDGFRA,CASP8,ALPK2,IL11RA,PLAT,CEP164,SERTAD2,HIST1H2AC,SDCCAG8,SMYD2,REV3L,DLC1,LAMP2,TRIO,ODZ4 (includes EG:26011),NFIA,CD44,MAP3K8,CASP7,CDKN2A,RIT1,IFI16,KLF6,PBK,PTEN,CXCL14,NUPR1,POLK,MYO10,COL27A1,ODZ2,S100A10,PAPPA,…
Hematopoiesis	5.63E-05-5.81E-03	IL6ST,CDKN2A,RAC2,ID2,PIK3R1,LIG4,GATA2,CDKN2B,HOXA9,DYRK3,PTEN,TCF12,VEGFA,HOXB3,RB1,ELF4,CLEC11A,CASP8,PLSCR1,IL11RA,PRNP,RUNX3,FST,IL6R,CDK6,BCL3,MBD2,KITLG,SNAI2,CD44,MAFB,DKK1,SOCS5
Lymphoid Tissue Structure and Development	5.63E-05-1.01E-03	IL6ST,KITLG,CLEC11A,FST,IL6R,CD44
Tissue Morphology	5.72E-05-5.75E-03	CDKN2A,RAC2,PIK3R1,NR2F2,NCK1,GATA2,HOXA9,PTEN,VEGFA,HAPLN1,HOXB3,RB1,LGALS8,S100A10,FST,DCN,IL6R,IGFBP5,PITX2,KLF4,CTSB,CFLAR,RXRA,CTTN,HOXA1,IL6ST,ID2,NUMB,UGCG,IGFBP7,TCF12,ELF4,SOX9,CD47,CLEC11A,CCL2,DKK3,ANXA1,GAS1,PDGFRA,GATA6,CASP8,CAV2,CITED2,PLSCR1,PRNP,PLAT,RUNX3,TNC,BGN,NQO1,SMAD6,SOAT1,XPA,ISG15,KITLG,NFIA,CD44,DKK1,MAFB
Dermatological Diseases and Conditions	6.34E-05-2.8E-03	COL1A2,VEGFA,COL5A1,COL1A1,COL6A3,COL13A1,ZEB2,COL27A1,COL7A1,COL3A1,FOLR1
Skeletal and Muscular Disorders	6.66E-05-4.85E-03	KIAA1618,ATXN1,CA12,MSX1,FAM69A,C10ORF18,VEGFA,RB1,ANKRD28,CSGALNACT2,FHL2,LUM,ZBTB20,EML1 (includes EG:2009),WNT5B,ZFHX3,FOXP1,RHOBTB3,IGFBP5,ANXA2,PITX2,RAP1A,RAB31,PPP2R3A (includes EG:5523),CTSB,FOXF1,CFLAR,RXRA,COL3A1,CD99 (includes EG:4267),FHL1,GADD45B,PTPN13,ARHGEF7,ODF2L,SLC1A3,IGFBP7,CDH11,COL5A1,TANK,USP3,LHFP,STOM,MYO1B,CCL2,GAS1,ADK,CASP8,ALPK2,IL11RA,PLAT,PLAGL1,CEP164,SERTAD2,HNRNP…
Neurological Disease	7.81E-05-5.19E-03	ABCB10,QKI,ATXN1,MSX1,CA12,FAM115A,FAM69A,VEGFA,HAPLN1,RB1,CSGALNACT2,FHL2,LGALS8,ZBTB20,EML1 (includes EG:2009),ZFHX3,FOXP1,RHOBTB3,DCN,SSTR1,ANXA2,IGFBP5,RAB31,MN1,MED13L,CTSB,BBS7,CFLAR,FOXF1,BACE2,RXRA,FOXK1,HOXA1,FHL1,LTBP2,PTPN13,LIG4,ARHGEF7,SLC1A3,IGFBP7,CDH11,TANK,SPON1,STOM,MYO1B,CCL2,NAV1,PDGFRA,ACSL4,CLIC3,FAIM,C9ORF150,CASP8,RNF19A,CITED2,PLAT,TNC,HNRNPU,DST,CD58,DLC1,F3,KITLG,LAMP2,…
Cell-To-Cell Signaling and Interaction	1.19E-04-5.81E-03	CDKN2A,IL6ST,CD99 (includes EG:4267),RAC2,ID2,PIK3R1,IFI16,ACTA2,IGFBP7,PTEN,VEGFA,SOX9,CD47,CCL2,DKK3,TIMP1,ANXA1,LGALS8,CASP8,MAP3K2,S100A10,TNC,FOXP1,BGN,DCN,IL6R,CD58,IGFBP5,ANXA2,ZEB1,PITX2,F3,RAP1A,KITLG,IFRD1,CD44,CAPN2,TFPI,COL7A1
Genetic Disorder	1.24E-04-2.23E-03	RAC2,KIAA1618,ABCB10,KIAA1462,IQCK,IDS,ASS1,PIK3R1,SNX3,FAM69A,C10ORF18,HAPLN1,RB1,ANKRD28,FHL2,LGALS8,GORAB,ZFHX3,RP2,ACAA1,FOXP1,RHOBTB3,C1GALT1C1,ANXA2,IGFBP5,ZEB1,PITX2,RAP1A,RNFT1,SCP2,MED13L,BBS7,CTSB,TMEM43,TBC1D5,CFLAR,RXRA,FHL1,LTBP2,GADD45B,LIG4,ODF2L,ETFDH,IGFBP7,SPON1,LHFP,CD47,CCL2,GSTA4,C9ORF150,UBE2D3,CASP8,HIST1H2BD,ALPK2,SERTAD2,HNRNPU,GLRX2,DST,HIST1H2AC,SMYD2,CSGALNACT1,ISG15,T…
Cellular Assembly and Organization	1.52E-04-5.65E-03	RAC2,ARHGEF7,PIK3R1,MAP1B,NUMB,NCK1,PTEN,VEGFA,COL1A2,COL5A1,CD47,ANXA1,LGALS8,LUM,LAMB1,CASP8,CAV2,MYO10,PRNP,RUNX3,TNC,DST,BACE1,ANXA2,DOCK7 (includes EG:85440),KITLG,COL1A1,WIPF1,PMP22,CHMP4A,NFIA,CD44,CAPN2,NFIB,CTTN,LGALS1,COL3A1
Metabolic Disease	1.6E-04-4.42E-04	IL6ST,RB1,CD47,LIG4,BGN,IGFBP5
Infectious Disease	1.91E-04-1.91E-04	CCL2,BGN,CALD1
Inflammatory Disease	1.91E-04-3.11E-03	KIAA1618,ATXN1,PIK3R1,CA12,SNX3,FAM69A,C10ORF18,VEGFA,RB1,ANKRD28,LUM,ZBTB20,GORAB,EML1 (includes EG:2009),WNT5B,ZFHX3,SSTR1,ZEB1,PITX2,RAP1A,RAB31,RNFT1,SCP2,CTSB,CFLAR,RXRA,GADD45B,ODF2L,SLC1A3,IGFBP7,CDH11,SPON1,USP3,COL5A1,LHFP,CCL2,ADK,PDGFRA,C9ORF150,ALPK2,CASP8,PLAT,IL11RA,SERTAD2,CEP164,TNC,DST,HIST1H2AC,SDCCAG8,SMYD2,CD58,CSGALNACT1,DLC1,F3,KITLG,ODZ4 (includes EG:26011),BNC1,NFIA,ZEB2,C…
Hypersensitivity Response	2.24E-04-4.33E-03	IL6ST,KITLG,RAC2,CLEC11A,PIK3R1,IL6R
Immune Cell Trafficking	2.24E-04-6.43E-04	KITLG,VEGFA,RAC2,CLEC11A,FHL2,PIK3R1,PDGFRA
Cellular Function and Maintenance	2.6E-04-5.79E-03	CDKN2A,ID2,IFI16,KLF6,IL6R,NQO1,ANXA2,PTEN,COL5A1,COL1A2,NR2F1,RB1,COL1A1,SMARCA2,TIMP1,ADK,CRABP2,GATA6,RSU1,RXRA,COL3A1
Embryonic Development	2.74E-04-4.33E-03	IL6ST,LIG4,PIK3R1,MSX1,NUMB,HOXA9,PTEN,VEGFA,RB1,GAS1,PDGFRA,GATA6,POLK,CITED2,FOXP1,TBX3,ZEB1,PITX2,KITLG,CRABP2,ZEB2,PEA15,CD44,DKK1,SEMA3C,RXRA,HOXA1,WNT5A
Respiratory Disease	2.93E-04-4.65E-03	CDKN2A,GADD45B,KLF6,NQO1,GLIPR1,RASD1,XPA,PTEN,VEGFA,RB1,LGALS8,CTSB,AKT3,CFLAR,CASP8
Tumor Morphology	6.43E-04-4.27E-03	CDKN2A,LIG4,RECK,S100A4,MBD2,F3,PTEN,COL1A2,VEGFA,RB1,COL1A1,CCL2,TIMP1,PEA15,CTSB,CD44,CTTN
Carbohydrate Metabolism	7.37E-04-2.07E-03	VEGFA,CSGALNACT2,CD47,TNC,LGALS8,CSGALNACT1,PRNP,LGALS1,PLSCR1
Hair and Skin Development and Function	7.37E-04-2.17E-03	COL5A1,DCN,LUM
Nervous System Development and Function	7.37E-04-3.54E-03	HOXB2,LIG4,NR2F2,MAP1B,SLC1A3,RPS6KA3,NUMB,MSX1,PTEN,NR2F1,VEGFA,RB1,NAV1,AKT3,FAIM,CITED2,ODZ2,PRNP,PLAT,IFT57,ZEB1,DLC1,KITLG,PMP22,PAX3,NFIA,ZEB2,NFIB,MAFB,DKK1,HOXA1
Renal and Urological Disease	7.37E-04-4.27E-03	RB1,SNAI2,LGALS8,PTEN
Small Molecule Biochemistry	7.37E-04-2.23E-03	IL6ST,TNC,IL6R,CSGALNACT1,VEGFA,KITLG,CD47,CLEC11A,SOX9,CSGALNACT2,LGALS8,PLSCR1,LGALS1,PRNP
Cell-mediated Immune Response	9.66E-04-2.15E-03	CDKN2A,IL6ST,RAC2,ID2,PIK3R1,NCK1,PTEN,TCF12,ELF4,CD47,DUSP10,CASP8,MAP3K2,IL11RA,RUNX3,CD58,MALT1,ITCH,KITLG,EFS,WIPF1,CD44,CFLAR,A2M,LGALS1
Lipid Metabolism	1.22E-03-1.22E-03	CD47,LGALS8,LGALS1,PLSCR1
Organ Morphology	1.95E-03-3.33E-03	COL5A1,VEGFA,FOXP1,TIMP1,TBX3,GAS1,IFT57,MSX1,PDGFRA,MEIS2,DLC1,PTEN
Drug Metabolism	2.07E-03-2.07E-03	VEGFA,TNC,PRNP
Amino Acid Metabolism	2.17E-03-2.17E-03	KITLG,SOX9
DNA Replication, Recombination, and Repair	2.17E-03-2.17E-03	REV3L,POLK
Humoral Immune Response	2.17E-03-2.17E-03	KLF9,KLF4
Cardiovascular Disease	2.23E-03-4.27E-03	VEGFA,STMN2,PDGFRA,F3,PLAT
Molecular Transport	2.23E-03-2.23E-03	IL6ST,KITLG,CLEC11A,IL6R
Infection Mechanism	3.16E-03-3.16E-03	CCL2,CD44,APOBEC3G,PRNP
Hepatic System Disease	4.12E-03-4.12E-03	IL6ST,RB1,GADD45B,TIMP1,PIK3R1,CTSB,UGCG,CASP8,CASP7
Visual System Development and Function	4.27E-03-4.27E-03	LUM,PITX2
Organismal Injury and Abnormalities	4.33E-03-4.33E-03	VEGFA,RB1,F3,XPA
Renal and Urological System Development and Function	4.85E-03-4.85E-03	CDKN2A,KLF6,CAV2,RXRA,PTEN

## Sheet: S1-D
Table S1-D. Functional Analysis of the upregulated genes in iPS-hKT and hKT
Category	P-value	Molecules
Genetic Disorder	7.03E-29-1.23E-02	AKAP8L,C18ORF25,PCLO,EIF1,NOM1,HIST2H2AA3,EXOC5,BTN3A1,KIAA1704,ECHDC1,DCP1A,TARSL2,AGA,ANXA2,LARP4,TMEM67,ZEB1,MAFF,EIF3C,THBS2,EYA3,ALCAM,RUNX1,THRB,KIAA1217,DFNB59,SH3RF2,LTBP2,ETFDH,C1ORF58,CDK10,FCHO2,RAB22A,UBE4A,AQP3,NAIP,NOTCH2,LNPEP,PROS1,TINAGL1,VPS13B,ATN1,MTMR3,SLC12A6,RUNDC2A,SLC12A8,ZFP57,DIP2A,RPS19,CSGALNACT1,LAMC2,CDS2,PDZD2,SVIL,BCL11A,WIPI1,CDKN2A,EML4,SMAD3,ZFP36L1,TOP3A,DNAJC…
Gastrointestinal Disease	1.28E-10-1.23E-02	IL13RA2,GPSM2,SLC38A6,SAMD12,EXOSC9,SC4MOL,ANXA2,ZEB1,RAD1,GART,TANC1,RNFT1,CTSB,ALCAM,RUNX1,CDK10,ANPEP,UBE4A,WDR66,AQP3,PALLD,LNPEP,MXD1,KIAA0427,PLOD2,SLC12A8,RPS19,CDCA7,CSGALNACT1,LAMC2,RNF6,TLK1,KIF23,CDKN2A,SMAD3,CSNK1A1,MAP4K4,PTEN,CARD8,FBXL2,FOSL2,SEC63,MTUS1,IL8,TIAM1,NUMA1,BACH1,DDX58,BAZ2B,TFPI,ETV5,ALG14,ZC3H7B,BMP2,IQGAP1,PHLDB2,EDN1,ZNF24 (includes EG:7572),MLLT3,STAT1,TIMP3,KDM4C…
Inflammatory Disease	1.28E-10-1.23E-02	IL13RA2,EIF1,FAM69A,NPAS2,SAMD12,SAFB,ZFHX3,SC4MOL,ZEB1,GART,ACER3,RNFT1,UQCRC2,THBS2,CTSB,ALCAM,RUNX1,KIAA1217,GADD45B,ANPEP,FCHO2,WDR66,PALLD,LNPEP,MXD1,KIAA0427,ZFP57,CSGALNACT1,VPS26A,LAMC2,FLT3LG,PDZD2,KIF23,CDKN2A,TAF1A,SMAD3,ZNF79,TOP3A,CX3CR1,SLC6A15,PTEN,CARD8,MPHOSPH9,FOSL2,EEF1E1,MTUS1,IL8,TIAM1,NUMA1,THBS1,PTPRM,BACH1,SPINK5,DDX58,AGBL3,GNRH1,TRPS1,BAZ2B,INSR,EREG,ETV5,ALG14,ZC3H7B,ER…
Cancer	1.8E-10-1.23E-02	AKAP8L,THOC2,EIF1,SLC38A6,JUB,HIST2H2AA3,EXOC5,SENP5 (includes EG:205564),ANXA2,ZEB1,THBS2,KCNK6,RUNX1,THRB,LTBP2,MCTS1,CDK10,SYNM,UBE4A,AQP3,NOTCH2,NAIP,CLDND1,TRIT1,SLC12A6,LSM14B,SLC12A8,RPS19,NOL7,SERPINB6,LAMC2,BUB1,BCL11A,CDKN2A,SMAD3,DNAJC15,CARD8,EEF1E1,ING2,TIAM1,ANGPTL1,HAS3,YPEL5,DDX58,GNRH1,TRPS1,PSME4,INSR,EREG,ETV5,PIAS1,MLLT3,TIMP3,TRPC1,MEF2A (includes EG:4205),FRMD4A,FOLH1,CXCL2,…
Reproductive System Disease	1.8E-10-5.9E-03	AKAP8L,THOC2,EIF1,SLC38A6,JUB,SENP5 (includes EG:205564),IFIT3,GRK4,ANXA2,ZEB1,GART,PDSS1,ZNF287,THBS2,CTSB,GTF2H1,MED8,ZBED5,CGRRF1,CDK10,NOTCH2,CLDND1,MXD1,SLC12A6,SCFD1,LSM14B,ABCG2,RPS19,NOL7,SERPINB6,FLT3LG,GALNT4,CDKN2A,DNAJC15,PTEN,EXOSC3,FOSL2,IL8,H19,THBS1,AURKAIP1,BCL2L10,CREG1,PTPRM,HAS3,TRPS1,GNRH1,INSR,EREG,ETV5,ALG14,BMP2,IQGAP1,NOG,EDN1,ERRFI1,STAT1,TIMP3,FLT1,MEF2A (includes EG:42…
Gene Expression	1.78E-09-1.23E-02	GTF3C3,IL13RA2,NPAS2,CIAO1,SAFB,PPM1A,ZFHX3,ZEB1,MAFF,ZNF287,EYA3,GTF2H1,RUNX1,THRB,SMARCA4,NOTCH2,MXD1,IBTK (includes EG:25998),ATN1,KHDRBS1,ZFP57,POLR1E,RNF6,MAZ,CDKN2A,TAF1A,SMAD3,POU2AF1,MAP4K4,PTEN,CHD2,ZNF808,FOSL2,ING2,IL8,TIAM1,TRIM8,CREG1,BACH1,BMPR1B,KDM1,BRWD1,DDX58,TRPS1,GNRH1,EREG,ETV5,RBM25 (includes EG:58517),EHF,BMP2,PIAS1,NR2E3,EIF2S1,IQGAP1,ZNF24 (includes EG:7572),STAT1,PRMT2,A…
Cardiovascular Disease	2.63E-09-6.76E-03	AKAP8L,DOCK4,NPAS2,SAMD12,CIAO1,HIST2H2AA3,GRK4,DCP1A,ANXA2,C20ORF12,OSBP,SCAPER,THRB,KIAA1217,SH3RF2,LTBP2,C1ORF58,SMARCA4,RAB22A,PROS1,TINAGL1,KIAA0427,MTMR3,RUNDC2A,DIP2A,CSGALNACT1,C4ORF42,FLT3LG,PDZD2,SVIL,BCL11A,TBC1D8,MPRIP,SMAD3,CX3CR1,PPFIBP1,PTEN,WTAP,EXOSC3,KLHL29,C21ORF7,ERLIN1,THBS1,CYP20A1,HEATR3,PTPRM,TTN,MARK3,BMPR1B,KDM1,TRPS1,PSME4,INSR,TFPI,EREG,UNC84A,ALG14,OSBPL6,NIPA1,KIAA00…
Endocrine System Disorders	4.88E-09-8.29E-06	PCLO,NOM1,MLLT4,GPR161,SAMD12,BTN3A1,KIAA1704,APPBP2,ZFHX3,NHEDC2,ZEB1,OSBP,CEP110,ARPC2,ALCAM,RUNX1,SETD2,THRB,KIAA1217,SH3RF2,SMARCA4,PALLD,NOTCH2,VPS13B,KIAA0427,ZFP57,CSGALNACT1,FLT3LG,LAMC2,PDZD2,SVIL,TLK1,SMAD3,RPGRIP1L,CX3CR1,PTEN,ANKRD50,CARD8,CHD2,FBXL2,KLHL29,C21ORF7,IL1RAP,MTUS1,IL8,TIAM1,IFT74,SPINK5,BRWD1,TRPS1,INSR,UNC84A,ALG14,OSBPL6,EXT1,ERC1,RBBP5,DDX59,CLIC4,IQGAP1,PHLDB2,ARL15,…
Metabolic Disease	4.88E-09-8.29E-06	PCLO,NOM1,MLLT4,GPR161,SAMD12,BTN3A1,KIAA1704,APPBP2,ZFHX3,NHEDC2,AGA,ZEB1,OSBP,CEP110,PDSS1,ARPC2,ALCAM,RUNX1,SETD2,THRB,KIAA1217,SH3RF2,LIG4,ETFDH,SMARCA4,PALLD,NOTCH2,VPS13B,KIAA0427,ZFP57,CSGALNACT1,LAMC2,PDZD2,SVIL,TLK1,MAZ,SMAD3,RPGRIP1L,CX3CR1,SC5DL,PTEN,ANKRD50,CARD8,CHD2,FBXL2,KLHL29,C21ORF7,IL1RAP,MTUS1,IL8,TIAM1,THBS1,IFT74,SPINK5,BRWD1,GNRH1,TRPS1,INSR,GNS,UNC84A,ALG14,OSBPL6,BMP2,EXT…
Organismal Development	4.03E-08-1.02E-02	PIAS2,IL13RA2,MLLT4,NPEPPS,KRAS,HOXC10,RB1,PLK4,GNPNAT1,GPD2,TRAF4,DLX6,DYNC2H1,FOXP1,PIGF,FGFR2,AGA,GGCX,ANXA2,ZEB1,MAFF,ATF2,MIB1,THBS2,CTSB,RUNX1,THRB,XRCC5,PGAP1,LIG4,COL4A3,SOX15,PROX1,JAK2,SMARCA4,NOTCH2,CCL2,MXD1,BRD4,DAB2,ASPH,NFE2L2,MMP1 (includes EG:4312),PRKDC,ATP1B1,NRP2,GNA12,HPSE,DDX3Y (includes EG:8653),SEMA3C,MAP3K3,PSEN1,CDKN2A,ICMT,ING5,LGALS3,SMAD3,TOP3A,ZFP36L1,PTHLH,MLL2,MEIS…
Neurological Disease	9.41E-08-7.07E-03	AKAP8L,C18ORF25,HIST2H2AA3,EXOC5,BTN3A1,ECHDC1,TARSL2,AGA,ANXA2,LARP4,TMEM67,MAFF,EIF3C,EYA3,ALCAM,RUNX1,THRB,DFNB59,PDCD2,LTBP2,CDK10,SYNM,UBE4A,NAIP,NOTCH2,PROS1,TINAGL1,VPS13B,ATN1,MTMR3,SLC12A6,SLC12A8,CDS2,PDZD2,SVIL,WIPI1,CDKN2A,EML4,ZFP36L1,CX3CR1,DNAJC15,TIAM1,GAS5,DDX58,TRPS1,GNRH1,INSR,UNC84A,ETV5,NR2E3,GALNT1,EIF2S1,ARL15,MLLT3,KDM4B,TIMP3,ZNF3,FRMD4A,FOLH1,CAMTA1 (includes EG:23261),C…
Molecular Transport	1.53E-06-1.23E-02	SLC7A11,KPNA6,TIMM23,ABCG1,RFFL,RHOB,FRAS1,ABCC1,DNAJA2,APPBP2,M6PR,KPNA4,SEC23IP,FGF9,IPO11,XPO7,TIMM17A (includes EG:10440),SEC23A,ABCC2,SEC22A,IL1RN,ABCC5,USE1,SNX1,UHMK1,PRICKLE1,ABCC4,ATP6V0E1,PDPN,ERGIC2,SLC46A1,PDIA3,NRG1,MCM3AP,NUP214,VAMP1,LGTN,CEP290,HINT1,LYST,SLC25A12,SLC19A1,LMAN2L,GOSR1,COG2,RPGR (includes EG:6103),BLZF1,ADRB2,RPAIN,SCFD1,PEX14,CALR,SLC25A13,ABCG2,KLHL2,AP4E1,RAB7A,…
Protein Trafficking	1.53E-06-8.37E-03	KPNA6,TIMM23,ABCG1,RFFL,RHOB,FRAS1,DNAJA2,APPBP2,M6PR,KPNA4,SEC23IP,FGF9,IPO11,XPO7,TIMM17A (includes EG:10440),SEC23A,SEC22A,USE1,SNX1,UHMK1,PRICKLE1,ATP6V0E1,ERGIC2,PDIA3,MCM3AP,NUP214,VAMP1,LGTN,CEP290,HINT1,LYST,LMAN2L,GOSR1,COG2,RPGR (includes EG:6103),BLZF1,ADRB2,RPAIN,SCFD1,PEX14,CALR,KLHL2,AP4E1,RAB7A,IPO7,UACA,SEC22B,KPNB1,TLK1,TMED10,SEC22C,KDELR2,STX7,AP1GBP1,RAB3GAP2,GOSR2,RAB6A,SIX3,…
Psychological Disorders	2.45E-06-2.45E-06	ABAT,AUTS2 (includes EG:26053),SCLT1,GANC,CREB5,ZNF385D,PRDM2,KIF13A,EXOC5,SRGAP2,BTN3A1,TSHZ2,FBXO9,OSBPL10,ALG9,ACER3,MED13L,EYA3,UQCRC2,C18ORF45,THRB,ESR2,PGM2,MTR,IGFBP7,ST7L,LAMP3,ALKBH8,C21ORF34,PALLD,CCL2,TAOK2 (includes EG:9344),OCIAD1,LY75,SLC12A6,MTMR3,HEATR5B,PRKDC,SLC12A8,OPTN,CDCA7,CDS2,PLEKHG1,ZNF284,PDZD2,ANO4,INADL,TAF1A,EML4,MLL2,MAP4K4,HSPA5,KIF16B,KIAA0562,NSUN6,STK4,ZNF490,ENT…
Cellular Growth and Proliferation	3.84E-06-1.21E-02	IL13RA2,EIF1,DOCK4,SKAP2,GNPNAT1,CIAO1,JUB,TRAF4,PPM1A,SAFB,ZFHX3,IFIT3,PIGF,ANXA2,ZEB1,MAFF,THBS2,KIDINS220,CTSB,ALCAM,RUNX1,THRB,MORC3,GADD45B,LIG4,CGRRF1,ETFDH,MCTS1,CDK10,SMARCA4,SYNM,NOTCH2,PELO,MXD1,BRD4,TRIT1,SLC12A6,KHDRBS1,EMP3,RPS19,CDCA7,FLT3LG,BUB1,TBC1D8,MAZ,CDKN2A,ING5,SMAD3,ZFP36L1,CSNK1A1,RPGRIP1L,MAP4K4,PTEN,CD164,WTAP,EEF1E1,FOSL2,ING2,MTUS1,IL8,TIAM1,H19,THBS1,CYP20A1,CREG1,ANG…
Immunological Disease	4.28E-06-1.23E-02	C18ORF25,PCLO,IL13RA2,EIF1,NPAS2,SAMD12,KIAA1704,BTN3A1,SAFB,APPBP2,ZFHX3,OSBP,GART,ACER3,ARPC2,UQCRC2,CTSB,ALCAM,RUNX1,THRB,KIAA1217,GADD45B,ANPEP,FCHO2,NOTCH2,PALLD,KIAA0427,ZFP57,SOAT1,FLT3LG,PDZD2,SVIL,TLK1,CDKN2A,SMAD3,ZNF79,TOP3A,RPGRIP1L,CX3CR1,SLC6A15,PTEN,CARD8,CHD2,FBXL2,KLHL29,EEF1E1,IL1RAP,MTUS1,IL8,TIAM1,THBS1,IFT74,PTPRM,SPINK5,AGBL3,GNRH1,BAZ2B,TRPS1,INSR,ETV5,ERC1,RBBP5,CLIC4,PHLD…
Cell Cycle	6.04E-06-1.23E-02	PIAS2,SYCP2,KRAS,TBRG1 (includes EG:84897),RB1,SOD2,JUB,SENP5 (includes EG:205564),PPM1A,MOBKL1B,ZFHX3,TYMS,AMACR,TP53INP1,TRIM21,FGFR2,ZEB1,RAD1,SKP2,ATF2,RUNX1,THRB,PTPRA,ESR2,XRCC5,MORC3,CLIP1,TRIM33,GADD45B,AKAP8,CDC42,PTPN2,GDF15,IGFBP7,JAK2,SMARCA4,ELF4,MAP4,NOTCH2,PROS1,MXD1,BRD4,UBE2D3,CDC5L,PAK2,KHDRBS1,GRB2,GNA12,FLT3LG,BUB1,CDKN1A,CDC27,PSEN1,KIF23,CDKN2A,ING5,LGALS3,SMAD3,TOP3A,PTHLH,…
Cell Morphology	1.11E-05-1.23E-02	SCLT1,DNAJC3,MLLT4,KRAS,NPEPPS,RB1,SOD2,JUB,LGALS8,EXOC5,GRK4,TNFRSF9,SEC23IP,TNFRSF10B,FGFR2,ANXA2,CLASP2,PLD1,SKP2,SEC23A,MN1,MIB1,THBS2,RUNX1,PTPRA,ESR2,LTBP2,FBXO7,CDC42,GDF15,EPHA4,PROX1,MCTS1,JAK2,IGFBP7,ANPEP,SMARCA4,SYNM,MAP4,PALLD,CD47,CCL2,MXD1,SOS1,TAOK2 (includes EG:9344),BRD4,DAB2,ASPH,NFE2L2,SLC12A6,PAK2,OPTN,GRB2,GNA12,VIM,CDCA7,FLT3LG,BCL11A,CDKN1A,MAZ,GATA3,CDKN2A,ICMT,LGALS3,MPR…
Skeletal and Muscular Disorders	1.16E-05-1.23E-02	C18ORF25,DOCK4,FAM69A,NPAS2,SAMD12,HIST2H2AA3,TRAF4,SAFB,BTN3A1,ZFHX3,ANXA2,TMEM67,MAFF,GART,ACER3,PDLIM7,THBS2,UQCRC2,CTSB,ALCAM,RUNX1,THRB,KIAA1217,EIF3K,GADD45B,FCHO2,NOTCH2,MXD1,TINAGL1,ATN1,KIAA0427,PLOD2,ABCG2,ZFP57,PDZD2,MXRA5,CDKN2A,TAF1A,SMAD3,ZNF79,TOP3A,RPGRIP1L,SLC6A15,CARD8,MPHOSPH9,EEF1E1,MTUS1,IL8,TIAM1,GAS5,THBS1,PTPRM,TTN,BMPR1B,AGBL3,BAZ2B,TRPS1,GNRH1,ETV5,KIAA0020,PIAS1,ERC1,YI…
Cell Death	1.19E-05-1.2E-02	AKAP8L,GNPNAT1,TRAF4,PPM1A,GRK4,THBS2,KIDINS220,CTSB,ALCAM,RUNX1,PDCD2,GADD45B,LIG4,MCTS1,ANPEP,SMARCA4,AQP3,NAIP,PALLD,NOTCH2,MXD1,BRD4,RNF19A,ATN1,KHDRBS1,EMP3,ABCG2,SOAT1,FLT3LG,UACA,BUB1,CDKN2A,ING5,MPRIP,POU2AF1,SMAD3,CSNK1A1,DNAJC15,CX3CR1,PTEN,KIAA0562,ZNF443,WTAP,CARD8,EEF1E1,FOSL2,ING2,IL8,TIAM1,THBS1,IFT74,RDX,AURKAIP1,BCL2L10,PTPRM,ANGPTL1,BMPR1B,DDX58,GNRH1,TRPS1,INSR,BMP2,PIAS1,ERC1,…
Embryonic Development	1.19E-05-1.23E-02	PIAS2,MLLT4,WBP4,HOXC10,RB1,MT2A,DLX6,DYNC2H1,FOXP1,FGFR2,ZEB1,INTS6,MAFF,TMEM127,MIB1,ATMIN,RUNX1,TRIM7,LIG4,PROX1,JAK2,SMARCA4,NOTCH2,MAP4,PALLD,BRD4,DAB2,ASPH,IRX3,NFE2L2,PLOD2,ATP1B1,KHDRBS1,RBM5,NRP2,GNA12,POLR1E,KPNB1,BCL11A,SEMA3C,GATA3,PSEN1,ICMT,PSMA3,SMAD3,EPB41L5,PTHLH,RPGRIP1L,MLL2,MAP4K4,AKIRIN2,PTEN,CD164,TPPP,UBE2B,HOXA10,FOSL2,SERPINB5,SMAD1,SNRPA1,TRIM8,PSMD6,APC,TTN,MLL,BMPR1B,K…
Connective Tissue Development and Function	1.25E-05-1.19E-02	HTR2B,NF2,F7,RBL1,EEF1D,RB1,GNPNAT1,BMI1,SOD2,ABCC1,EZR,TRAF4,LGALS8,NFKBIB,FRS2,ITGB5,AHR,ATM,TFDP1,MITF,DCN,TNFRSF10B,CNOT6L,ZNF675,L1CAM,GRK5,ZEB1,SKP2,MAX,PDLIM7,NRCAM,CD9,IRS1,THBS2,RTN4,THRB,NPR2,ESR2,PTPRA,MORC3,ENAH,LTBP2,GADD45B,FN1,CDC42,PTPN2,BTG3,LIG4,CUL1,BMPR2,TRPV1,FNTB,EIF4E,XRCC4,IDH1,SMURF1,ATP7A,PALLD,JUN,CCL2,SOS1,MXD1,BRD4,FGD4,PRKCE,LPP,CTNNB1,NFE2L2,IRF2,SLC12A6,KHDRBS1,SUZ…
Cellular Assembly and Organization	3.96E-05-1.23E-02	PIAS2,KRAS,RICTOR,LIFR,LPIN1,JUB,EZR,GRK4,ATG7,KALRN,SEC23IP,ITGA5,L1CAM,PLD1,SEC23A,AKAP13,TIAM2 (includes EG:26230),CAPN1,RTN4,PTPRA,NRP1,RALA,FN1,CDC42,PDIA3,ARHGEF7,TSGA10,EPHA4,BCL11B,DMD,EIF4E,ATP7A,CD47,EFNA5,FGD4,ROBO2,ARHGEF3,STX12,PTPRK,TNC,OPTN,NRP2,RAB5A,GRB2,DST,MAPK8,DLC1,AXL,RABGEF1,TRIO,CDC42BPA,KLF7,NFIA,STX7,CD44,VAMP4,PSEN1,CTNND1,CDKN2A,VTI1A,GAS2L1,MBP,RABEP1,TLN1,PVR,PTEN,PT…
Organismal Injury and Abnormalities	4.88E-05-1.23E-02	IL1A,PPARD,STK11,PTGS1,RBL1,APC,PTEN,PLA2G4A,RB1,PIK3R2,ASPH,PTGS2,STAT1,CTNNB1,NFE2L2,MMP1 (includes EG:4312),AHR
Cellular Development	6.98E-05-1.23E-02	SCLT1,IL13RA2,KRAS,RB1,SOD2,JUB,LGALS8,EXOC5,SAFB,TNFRSF10B,FGFR2,CLASP2,ZEB1,PLD1,PDLIM7,THBS2,CTSB,RUNX1,THRB,PTPRA,XRCC5,GADD45B,CDC42,PTPN2,LIG4,SOX15,EPHA4,PROX1,JAK2,BCL11B,ANPEP,SMARCA4,SYNM,ASB1,ELF4,PALLD,CD47,NOTCH2,CCL2,MXD1,SOS1,TAOK2 (includes EG:9344),BRD4,DAB2,NFE2L2,MMP1 (includes EG:4312),PRKDC,ATP1B1,KHDRBS1,OPTN,NRP2,GNA12,TAF8,IRAK3,EPHA3,FLT3LG,BCL11A,CDKN1A,RAD52,SHMT1,GATA3…
Tissue Development	8.6E-05-1.23E-02	MLLT4,HOXC10,PKN2,RB1,TPH1,GNPNAT1,FRAS1,FBLN1,TRAF4,LGALS8,MAP3K2,FOXP1,PIGF,FGFR2,ZEB1,DES,PLD1,THBS2,RUNX1,THRB,ESR2,PTPRA,GADD45B,LTBP2,CDC42,COL4A3,SOX15,EPHA4,PROX1,JAK2,IGFBP7,SMARCA4,OGT,PALLD,NOTCH2,CD47,CCL2,DAB2,IRX3,SLC12A6,NRP2,HPSE,LAMC2,PLA2G4A,SVIL,CDKN1A,SEMA3C,GATA3,MAP3K3,PSEN1,CDKN2A,ICMT,VAMP5,RPL22,LGALS3,CDCP1,EPB41L5,SMAD3,PTHLH,MAP4K4,RPGRIP1L,PTEN,RHOB,ADAM28,RUNX2,HOXA1…
Connective Tissue Disorders	1.17E-04-2.31E-03	NPAS2,GNPNAT1,SAMD12,SAFB,ZFHX3,GART,ACER3,UQCRC2,THBS2,CTSB,ALCAM,RUNX1,KIAA1217,GADD45B,FCHO2,MXD1,KIAA0427,PLOD2,ZFP57,ABCG2,CDCA7,PDZD2,BCL11A,CDKN2A,SMAD3,ZNF79,TOP3A,SLC6A15,PTEN,CARD8,EEF1E1,MTUS1,IL8,TIAM1,THBS1,PTPRM,AGBL3,BAZ2B,GNRH1,TRPS1,INSR,ERC1,GALNT1,CLIC4,NOG,PHLDB2,ERRFI1,MLLT3,STAT1,TIMP3,PRMT2,CCDC93,FLT1,FRMD4A,ESD,CADM1,CAMTA1 (includes EG:23261),CXCL2,SAMD9,QKI,CEP120,C22OR…
Cellular Compromise	1.27E-04-6.06E-03	THOC2,EXOSC10,NF2,F7,ZNF436,WBP4,PLEKHA3,SLC38A6,DNAL1,PKN2,INTS7,LNX2,GPD2,MT2A,ETF1,SENP5 (includes EG:205564),UAP1,CRIM1,ATG7,PGRMC2,DIMT1L,ITGA5,USP6,SSR1,INTS6,TMEM127,AKAP13,ETV3,PDSS1,TIAM2 (includes EG:26230),IQCA1,TGDS,CTSB,AHCTF1,ATMIN,MED31,GTF2H1,ST3GAL5,SPTBN1,TRIM7,RREB1,MED8,FN1,EVI1,NUP160,PDIA3,PPP2R2A,HEATR1,LIG4,ZBED5,VPS53,CD55,NUP214,FLJ35785,EP300,IDH1,COL5A1,ALKBH8,LRRC8E,C…
Infectious Disease	1.27E-04-1.09E-02	EIF1AY,C18ORF25,THOC2,SLC38A6,PLEKHA3,WBP4,HIST1H2BK,PKN2,IFIH1,TPH1,LNX2,MT2A,GPD2,HIST2H2AA3,ETF1,DYNC2H1,SENP5 (includes EG:205564),C20ORF26,TYMS,TNFRSF9,PGRMC2,ANXA2,USP6,IFNAR2,INTS6,TMEM127,ETV3,PDSS1,TIAM2 (includes EG:26230),CTSB,ATMIN,GTF2H1,ESR2,XRCC5,TRIM7,MED8,LTBP2,NUP160,ZBED5,HS2ST1,GDF15,ANPEP,SLC39A11,ALKBH8,MAP4,CD47,CCL2,PROS1,CLDND1,MXD1,HIST1H2BD,SCFD1,LSM14B,SLC9A6,PLOD2,HNR…
Skeletal and Muscular System Development and Function	1.31E-04-1.23E-02	HTR2B,RBL1,HOXC10,RB1,BMI1,TRAF4,DLX6,DYNC2H1,SHOX2,NAB1,FOXP1,ZNF675,FGFR2,ANXA2,ZEB1,PLD1,ATF2,MN1,PDLIM7,RUNX1,THRB,ESR2,PTPRA,NPR2,EVI1,FN1,GADD45B,SOX15,TWIST1,BMPR2,DMD,CDH11,SMARCA4,EP300,SMURF1,ATP7A,NOTCH2,JUN,TFAP2A,RARB,ASPH,CTNNB1,TBX3,COL12A1,GNA12,GNAQ,MAPK8,KIF3A,PLA2G4A,SVIL,TRIO,LUC7L,SOX6,MBNL1,ACVR2A,PSEN1,FBN2 (includes EG:2201),CDKN2A,MATN3,FOXP2,VAMP5,OSTF1,LGALS3,IFI16,SMAD…
Developmental Disorder	1.79E-04-1.02E-02	HTR2B,OFD1,NF2,DNAJC3,KRAS,IFT80,RBL1,EEF1D,BBS10,RB1,FRAS1,FBLN1,TRAF4,SULT1E1,HS3ST1,TXN,HIPK1,FRS2,AHR,ATM,CALCRL,NAB1,ATG7,MITF,FGFR2,SLC17A5,TMEM67,DES,SKP2,SEC23A,OPHN1,SNAI2,CTSB,BBS7,BBS9,MAP2K3,THRB,NPR2,ESR2,BBS12,AKAP8,LEPR,PGAP1,ARHGEF7,CUL1,MID1,FKBP1A,JAK2,MTR,DMD,EP300,LBR,ATP7A,NOTCH2,JUN,INSIG2,ADRB1,NCOA2,CCL2,MYBL1,CCL28,SOS1,RARB,DIP2B,PRKCE,VPS13B,FABP3,ASPH,CTNNB1,MMP1 (incl…
Hepatic System Disease	2.53E-04-8.13E-03	EPS15,LGALS3,INSIG1,SMAD3,MLLT4,MEIS1,CIRH1A,ABCG1,PDE4D,PTEN,ATP8B1,SOD2,CYP2E1,ABCC1,IRS2,SEC63,MYO10,AHR,PHACTR3,IL8,CALCRL,TNFRSF9,MLLT10,BLVRA,ITGA5,SLC17A5,CNTN6,FGFR2,THRA,IFNGR1,MUT,PPP3CC,IFNAR2,MLL,CBLB,TANC1,ABCC2,TUBE1,IRS1,MAK16,BAZ2B,RAG1,GPM6A,INSR,JAG1,ESR2,KDSR,SLC35A1,RELA,PDE7A,SEMA6A,TUFT1,AFF4,GK,IQGAP1,PDGFC,FAS,SLC39A11,LIPA,NOTCH2,INSIG2,ADRB1,EFNA5,MLLT3,AMY2B (includes E…
DNA Replication, Recombination, and Repair	3.37E-04-7.16E-03	CDKN2A,MCM6,PLRG1,ATXN3,CBX3,KPNA1,RBL1,SYCP1,RECQL,RB1,SOD2,WRN (includes EG:7486),UBE2B,RAD51C,ATM,RECQL5,TYMS,MBD2,MLL,ATF2,RAD1,ERCC1,DCLRE1C,H2AFX,RAG1,GTF2H1,LEF1,XRCC5,LIG4,POLI,ASF1A,FAS,XRCC4,MCM4,RAD51,JUN,HUS1,CDC5L,RAD23B,DNASE1,RPAIN,PRKDC,ATRX,PSMC3IP,RAD51L1,REV3L,TSN,RPS27L (includes EG:51065),HMGA2,NBN,REV1,ATF7IP,CDKN1A,RAD52,MSH6,IL1B,SETMAR,ERCC5,ATR (includes EG:545),POLH
Cellular Movement	3.67E-04-1.19E-02	PEX13,NEXN,SOD2,JUB,FBLN1,PIGF,ANXA2,TFPI2,PLD1,SKP2,TIAM2 (includes EG:26230),THBS2,CTSB,ALCAM,PTPRA,ESR2,LTBP2,CDC42,PTPN2,COL4A3,GDF15,MYLK3,PROX1,JAK2,ANPEP,SYNM,PALLD,CD47,C5AR1,CCL2,SOS1,MXD1,PIK3R2,NFE2L2,MMP1 (includes EG:4312),SLC12A6,NRP2,GNA12,RPS19,VIM,HPSE,LAMC2,FLT3LG,CDKN1A,SEMA3C,GATA3,PSEN1,REPS2,CDKN2A,LGALS3,SMAD3,GNB2L1,PTHLH,MAP4K4,PDE4D,AIMP1,PVR,SHC4,PTEN,RHOB,RUNX2,ENTPD5,…
Infection Mechanism	3.91E-04-3.77E-03	RELA,PRMT2,CDC42,SMAD3,KLF6,RAC1,SNW1,MDFIC,MSX2,NCOA3,SMARCA4,EP300,AKAP13,MN1,TGFB1I1,WRN (includes EG:7486),JUN,CTNNB1,THRB,ESR2,IL11
Post-Translational Modification	3.99E-04-7.9E-03	PIAS2,MIB2,UBR2,TOR1A,NF2,WWP1,RICTOR,LRPAP1,AFAP1L2,RFFL,AADACL1,FKBP9,BMI1,SOD2,PTPRO,DYNC2H1,PPM1A,SMG1,TXN,BAG5,AHR,ATM,ATG7,FCRL4,MYST4,PGGT1B,AGA,GGCX,ALG9,PDSS1,CD9,CAPN1,ERO1LB,SENP1,EYA3,DUSP4,PTPRA,SPTBN1,LMTK2,CRKRS,ADAM17,FN1,PTPN2,GALNT5,RPN2,PTPN13,PPP2R2A,PDIA3,PTPN9,CUL1,CD55,FKBP1A,JAK2,FNTB,UBE4A,SMURF1,EP300,OGT,LIPA,CD47,HHAT,PRKCE,UBE2D3,TBCD,OTUD7B,PFDN4,MMP1 (includes EG:43…
Hematopoiesis	4.14E-04-6.11E-03	IL13RA2,MAF,WWP1,KRAS,JMJD6,RB1,BMI1,SOD2,PRDM1,BST1,ATM,MCL1,CDC2L5,MBD2,CD9,IRS1,SNAI2,THBS2,RUNX1,XRCC5,ADAM17,FN1,EVI1,PTPN2,LIG4,EPHA4,JAK2,RTKN2,SMARCA4,XRCC4,EIF4E,EP300,ATP7A,ELF4,NOTCH2,JUN,RARB,LAMP1,SLC19A1,CTNNB1,IRF2,PRKDC,GRB2,MAPK8,EPHA3,FLT3LG,FUS,LTBP1,SOX6,BCL11A,TNFSF13,RAD52,CD44,PTGS2,GATA3,TIRAP,PTPN22,CDKN2A,TNFRSF4,MBP,POU2AF1,MEIS1,MYH11,DICER1,BCL6,CTBP1,RORA,RUNX2,EZH2,…
Renal and Urological Disease	4.14E-04-2.6E-03	PSMA3,EPS15,EXOSC10,WBP4,SFXN3,CD164,TPPP,UBE2B,MT2A,AMMECR1,SNRPA1,MED7 (includes EG:9443),ZNF594,TRIM8,PSMD6,SNW1,MYOF,INTS6,TTC3,TMEM127,COL4A5,AKAP13,ERCC1,IQCA1,USE1,AHCTF1,ATMIN,CTSB,RELA,TRIM7,ZC3H7B,RREB1,RBM25 (includes EG:58517),COL4A6,OSBPL6,COL4A3,ETS2,NUP214,CHORDC1,EP300,IDH1,COL5A1,LRRC8E,MAP4,OTUD1,PTDSS1,DCP2,HMGCS1,TCF20,PLOD2,ZNF292,KHDRBS1,RBM5,MRPS12,POLR1E,CDC42EP3,CCAR1,MED…
Respiratory Disease	4.29E-04-1.2E-02	REPS2,CDKN2A,LGALS3,GADD45B,SLC7A11,MTBP,CDCP1,PIAS1,TFAP2B,NRG1,KLF6,GLIPR1,SMARCA4,FAS,RFFL,EP300,RB1,NOTCH2,SOD2,RHOB,PTPRO,TRAF4,LGALS8,RABGGTB,AKT3,PRKCE,TRIT1,ATM,MCL1,TNFRSF10B,MAPK8,RAC1,CCAR1,MDC1,DLC1,CADM1,SKP2,MDM4,SMARCA2,CASP2,CDKN1A,CFLAR,PTGS2,LRDD,ATR (includes EG:545),PMEPA1,POLH
Cardiovascular System Development and Function	4.94E-04-1.23E-02	HTR2B,QKI,TGFBR3,IL13RA2,JMJD6,SOD2,DDAH1,SHOX2,ITGB5,AHR,ATM,CALCRL,FOXP1,PIGF,ERAP1,FGFR2,ANXA2,MIB1,THBS2,CTSB,RTN4,RUNX1,CFLAR,ESR2,ANG,NRP1,COL3A1,SPTBN1,ADAM17,FN1,LEPR,COL4A3,FKBP1A,SMARCA4,EP300,COL5A1,ATP7A,JUN,CCL2,PRKCE,HEXIM1,CTNNB1,MMP1 (includes EG:4312),GLMN,PRKDC,PDZK1,NRP2,TBX3,GNAQ,HPSE,DLC1,F3,F11R,PTGS2,SEMA3C,MAP3K3,PSEN1,CDKN2A,LGALS3,PTHLH,NR2F2,ZFP36L1,FBXW7,MEIS1,DICER1,M…
Dermatological Diseases and Conditions	5.4E-04-1.23E-02	CDKN2A,PSMA3,EXOSC10,WBP4,SFXN3,CD164,TPPP,CCL27,UBE2B,MT2A,SNRPA1,MED7 (includes EG:9443),TIAM1,TRIM8,ZNF594,PSMD6,VEGFC,SNW1,MYOF,IL24,INTS6,RCAN1,ATF2,TTC3,TMEM127,AKAP13,ERCC1,IQCA1,IL1RN,USE1,AHCTF1,ATMIN,RELA,TRIM7,ZC3H7B,RREB1,RBM25 (includes EG:58517),FN1,OSBPL6,ETS2,NUP214,CHORDC1,IDH1,EP300,COL5A1,LRRC8E,MAP4,MCAM,OTUD1,PTDSS1,STAT1,CTNNB1,DCP2,HMGCS1,TCF20,PLOD2,ZNF292,KHDRBS1,RBM5,POL…
Organismal Functions	5.54E-04-6.59E-03	DCBLD2,FN1,PDGFA,NRG1,FNTB,NOG,SERPINB2,COL5A1,NOTCH2,MT2A,JUB,POU2F3,PPARD,FLT1,MAP3K1,PTGS1,HPSE,IL24,B4GALT1,NF1,IL1RN,IRS1,PTGS2,EREG,COL3A1
Cell-To-Cell Signaling and Interaction	6.16E-04-1.23E-02	MLLT4,F7,KRAS,LRPAP1,SERPINB2,PKN2,LIFR,TPH1,GNPNAT1,BMI1,LGALS8,TXN,NFKBIB,ITGB5,MAP3K2,FOXP1,DCN,ZNF675,ITGA5,L1CAM,ANXA2,ZEB1,THBD,PLD1,CD9,IRS1,THBS2,NRP1,ADAM17,FN1,CDC42,COL4A3,CD55,FKBP1A,EPHA4,JAK2,IGFBP7,OGT,PALLD,CD47,CCL2,CCL28,DAB2,PRKCE,LIPG,CTNNB1,SLC12A6,TNC,TGFBI,HPSE,CD58,IRAK3,AXL,F3,LAMC2,F11R,CD44,PAFAH1B1,NEDD9,PSEN1,CDKN2A,LGALS3,TNFRSF4,CDCP1,SMAD3,KLF6,CDK5R1,PTK2,RHOB,ADA…
Tumor Morphology	6.16E-04-1.2E-02	CDKN2A,SMAD3,NF2,F7,KRAS,RBL1,BCL6,PTEN,PTK2,RB1,RUNX2,SERPINB5,ITGB5,ATM,THBS1,DCN,ITGA5,FGFR2,VEGFC,IL24,ANGPTL1,SKP2,IL1RN,SNAI2,THBS2,CTSB,RAG1,INSR,TFPI,ESR2,CTTN,NRP1,RELA,IL1A,ADAM17,FN1,LIG4,COL4A3,RECK,NRG1,FKBP1A,PDGFC,FAS,CD47,JUN,MCAM,ERBB4,PRKCE,CTNNB1,MMP1 (includes EG:4312),SDC1,FLT1,MAPK8,HPSE,VIM,F3,RAD52,CD44,IL1B,PSEN1
Organismal Survival	6.32E-04-1.69E-03	PIAS2,RB1,GNPNAT1,SOD2,FBLN1,TRAF4,HS3ST1,TNFRSF9,FOXP1,FGFR2,AGA,MAFF,CTSB,CFLAR,ESR2,XRCC5,LTBP2,PTPN2,LIG4,MTR,JAK2,PALLD,NOTCH2,C5AR1,BRD4,ASPH,NFE2L2,ATN1,PRKDC,NRP2,GNA12,PTGS1,RPS19,FLT3LG,LY96,CDKN1A,GATA3,MAP3K3,PSEN1,CDKN2A,ICMT,ATP2B1,SMAD3,PTHLH,MAP4K4,CX3CR1,CEBPG,PTEN,RUNX2,EEF1E1,SERPINB5,SMAD1,UBE4B,VEGFC,BACE1,UBA6,THRA,APC,CBLB,MDM4,TFAM,SPINK5,ADAM12,DDX58,RAG1,INSR,IL6ST,RELA,…
Nervous System Development and Function	6.61E-04-1.23E-02	PIAS2,NPAS2,RBL1,LIFR,BMI1,DYNC2H1,IRS2,FRS2,ATM,ATG7,KALRN,FGFR2,L1CAM,ZEB1,ATF2,TIAM2 (includes EG:26230),NRCAM,CD9,MIB1,THBS2,RTN4,GRLF1,B3GNT5,RUNX1,ESR2,NRP1,SPTBN1,EVI1,CDC42,PDIA3,LIG4,ARHGEF7,SLC1A3,EPHA4,BCL11B,DMD,ABLIM1,XRCC4,SMARCA4,ATP7A,PTS,EFNA5,ROBO2,CTNNB1,IRX3,ATN1,CELSR1,PRKDC,PTPRK,OPTN,NRP2,SH3GL3,ZFP57,DST,MAPK8,DLC1,KLF7,JRKL,NFIA,ZEB2,CD44,GATA3,PAFAH1B1,SIX3,PSEN1,CDKN2A,…
Digestive System Development and Function	7.64E-04-7.64E-04	SPTBN1,RELA,ICMT,ATG7,TGFBR3,SMAD3,ACOX1,RPGRIP1L,KRAS,CADM1,CIAPIN1,RB1,MDM4,SOD2,SP3,NF1,MKL2,RUNX1,AHR
Hepatic System Development and Function	7.64E-04-7.64E-04	SPTBN1,RELA,ICMT,ATG7,TGFBR3,SMAD3,ACOX1,RPGRIP1L,KRAS,CADM1,CIAPIN1,RB1,MDM4,SOD2,SP3,NF1,MKL2,RUNX1,AHR
Organ Development	7.64E-04-1.16E-02	HTR2B,TGFBR3,KRAS,RBL1,RB1,JMJD6,BMI1,SOD2,FBLN1,DYNC2H1,IRS2,SHOX2,FRS2,AHR,ATM,CALCRL,ATG7,FOXP1,MITF,FGFR2,ITGA5,MAN1A2,MIB1,THBS2,GRLF1,RUNX1,CFLAR,ESR2,NRP1,COL3A1,SPTBN1,FN1,EVI1,SLC1A3,FKBP1A,BMPR2,SMARCA4,ASB1,EP300,COL5A1,ATP7A,EFNA5,RARB,HEXIM1,CTNNB1,IRX3,PRKDC,NRP2,TBX3,ACOX1,GNAQ,MAPK8,DLC1,SEMA3C,PAFAH1B1,SIX3,PSEN1,CDKN2A,FOXP2,ICMT,SMAD3,NR2F2,PTHLH,RPGRIP1L,MSX2,CDK5R1,PTEN,CTBP1…
Protein Folding	9.08E-04-9.08E-04	PPID,CALR,MKKS,TOR1A,SGTB,FKBP1A,CCT6A,CLPX,HSPD1,HSPA5,BAG2,LRPAP1,FKBP9,ERP44,ERO1LB,DNAJC1,TCP1,DNAJA2,NFYC,TXN,TBCD,BAG5,PFDN4
Cellular Function and Maintenance	1.06E-03-1.2E-02	CDKN2A,REPS2,EPS15,RABEP1,KRAS,TLN1,RICTOR,LRPAP1,LPIN1,CCL27,RHOB,EZR,MYO6,M6PR,GRK4,IL8,TIAM1,ARHGAP27,KALRN,RAC1,RDX,ITGA5,CLCN5,AKAP13,CBL,PDLIM7,LRRN3,SNX1,CTTN,PTPRA,CYTH2,FN1,RALA,CDC42,PDGFA,EPHA4,REPS1,PTPRF,FAS,RAB22A,RABEPK,CCDC88A,CD47,EDN1,EFNA5,DAB2,STAM2,LY75,MARCKS (includes EG:4082),ARHGEF3,CAV2,ADRB2,TNC,RAB5A,ATP2C1,GRB2,RAB7A,AXL,DLC1,KIF3A,SNAP25,CDC42BPA,TRIO,SYNJ1,NF1,TPM3,…
Renal and Urological System Development and Function	1.07E-03-4.18E-03	CDKN2A,FN1,PIAS1,KLF6,NF2,FAS,TMEFF2,PTEN,SOD2,JUN,EFNA5,ERBB4,EXOC5,CAV2,CTNNB1,OXTR,SDC1,TFDP1,THBS1,TNFRSF10B,PTP4A1,APC,S1PR3,KLF5,GNRH1,PTGS2
Cell Signaling	1.22E-03-1.13E-02	MIB2,TFG,TGFBR3,SOCS6,KLF6,MARK1,NF2,MAP4K4,KRAS,EEF1D,TMED4,LIFR,PTK2,FGFR3,STK4,TRIM13,CARD8,SNIP1,PPM1A,IL1RAP,SMAD1,MAP3K13,ZNF675,SH2D3A,MALT1,IFNAR2,STAMBP,APC,MAP2K3,DUSP4,EREG,SOCS5,IL6ST,AZI2,RELA,IL1A,TIFA,GADD45B,LEPR,PIAS1,NRG1,FKBP1A,JAK2,PTPRF,CCL2,EDN1,DOK4,STK17A,TNIP2,DUSP10,MKNK1,TAOK2 (includes EG:9344),ZDHHC13,FAIM,STAT1,CTNNB1,OTUD7B,TMEM9B,ADRB2,SLC20A1,ATP2C1,GRB2,GNA12,FLT…
Cell-mediated Immune Response	1.44E-03-6.11E-03	CDKN2A,TNFRSF4,MBP,IL13RA2,MAF,WWP1,DICER1,BCL6,JMJD6,BMI1,RORA,ATM,SOX4,FOXP1,MLLT10,MBD2,APC,SPINK5,RAG1,LEF1,RUNX1,XRCC5,PKNOX1,LIG4,EPHA4,BCL11B,SMARCA4,NOG,XRCC4,TCF12,ATP7A,SP3,LAMP1,CTNNB1,STAT1,IRF2,PRKDC,APAF1,MAPK8,IL1R1,HSPD1,LTBP1,HIVEP2,RC3H1,BCL11A,IL1B,PTGS2,GATA3,PTPN22
Drug Metabolism	1.44E-03-1.23E-02	PDPN,IL1A,SLC46A1,ABCG2,NRG1,ABCC2,ABCC5,IL1RN,ABCC1,SLC19A1,IL1B,PTGS2,ABCC4
Humoral Immune Response	1.44E-03-8.63E-03	PRKDC,FOXP1,LIG4,POU2AF1,BCL11B,BCL6,XRCC4,NBN,ERCC1,TNFSF13,MSH6,RAG1,PRDM1,TNFSF13B
RNA Damage and Repair	2.31E-03-2.31E-03	GSPT1,ZHX2,ZFP36L1,SMG7,HNRNPD,SMG1,ZFP36L2
Amino Acid Metabolism	2.76E-03-6.06E-03	PDPN,SLC25A13,SLC7A11,SLC46A1,PGGT1B,FNTB,CHM,ABCC5,SLC25A12,ABCC1,RABGGTB,SLC19A1,ABCC4
Small Molecule Biochemistry	2.76E-03-1.23E-02	PDPN,NAPEPLD,IL1A,SLC7A11,GALNT5,SLC46A1,NRG1,MTMR1,EXT1,FNTB,PTEN,CHM,MTMR6,SLC25A12,CYP2E1,ABCC1,TGFB2,RABGGTB,MTM1,CHPT1,CHST11,SLC19A1,PI4K2B,PTX3,IL8,NADPH,SLC25A13,PIK3C2A,RAB5A,XYLT1,FLT1,PGGT1B,PTGS1,FAR1,CSGALNACT1,GLCE,HAS3,ELOVL6,PLA2G4A,INPP4A,XYLT2,LPCAT2,IL1RN,ABCC5,IL1B,PTGS2,HMGCR,ABCC4
Vitamin and Mineral Metabolism	2.76E-03-2.76E-03	PDPN,SLC46A1,ABCC5,ABCC1,SLC19A1,ABCC4
Endocrine System Development and Function	3.46E-03-3.46E-03	IL1B,ERC1,PLD1
Hematological System Development and Function	3.46E-03-1.04E-02	IL13RA2,MAF,WWP1,KRAS,F7,JMJD6,RB1,TPH1,BMI1,SOD2,PRDM1,BST1,MCL1,ATM,CDC2L5,GGCX,ANXA2,MBD2,THBD,CD9,IRS1,SNAI2,THBS2,RUNX1,XRCC5,ADAM17,FN1,EVI1,PTPN2,LIG4,EPHA4,RTKN2,JAK2,SMARCA4,EIF4E,XRCC4,EP300,ELF4,ATP7A,NOTCH2,JUN,PROS1,RARB,LAMP1,SLC19A1,CTNNB1,MMP1 (includes EG:4312),IRF2,PRKDC,GRB2,GNA12,GNAQ,MAPK8,EPHA3,FLT3LG,F3,FUS,LTBP1,SOX6,BCL11A,TNFSF13,RAD52,CD44,PTGS2,TIRAP,GATA3,PTPN22,PSEN1…
Lipid Metabolism	3.46E-03-1.23E-02	IL1A,NAPEPLD,NRG1,MTMR1,PTEN,MTMR6,CYP2E1,MTM1,CHPT1,PI4K2B,PTX3,NADPH,IL8,PIK3C2A,RAB5A,FLT1,PTGS1,FAR1,ELOVL6,INPP4A,PLA2G4A,LPCAT2,IL1RN,IL1B,PTGS2,HMGCR
Protein Synthesis	3.46E-03-1.02E-02	RELA,FBXO7,UBR2,EIF1,UBR1,ABCG1,EIF2S1,RBL1,FBXL4,EIF4E,PDCD4,UBE4A,UHRF2,LNPEP,UBE2B,PPP1R2,PAIP1,MKNK1,EIF5,PDSS2,UBE2D3,EIF4B,RPS6KB1,ATG7,UBE4B,EIF4G3,FBXO8,UBE3A,USP33,APC,RNF6,UBR3,SKP2,KIAA0368,ARIH1,ITCH,UBE2G2,CBLB,MDM4,PDSS1,DDX6,USE1,IRS1,SMURF2,EIF2AK2,INSR,DERL2,PSEN1
Carbohydrate Metabolism	4.44E-03-1.19E-02	IL1A,GALNT5,HS2ST1,MTMR1,EXT1,LRPAP1,PTEN,MTMR6,B3GALT2,ALG2,GNPNAT1,GNPTAB,CEPT1,TGFB2,MTM1,CHPT1,CHST11,PRKCE,SMG1,FABP3,COG2,UAP1,PI4K2B,GNE,PTX3,IL8,PIK3C2A,RAB5A,FLT1,XYLT1,DPAGT1,GLCE,CSGALNACT1,ALG9,HAS3,PCYT1A,PLA2G4A,INPP4A,XYLT2,LPCAT2,SYNJ1,B4GALT1,IL1RN,GALK1,IL1B,PTGS2
Protein Degradation	4.61E-03-4.61E-03	RELA,FBXO7,UBR2,UBR1,ABCG1,FBXL4,UBE4A,UHRF2,LNPEP,UBE2B,UBE2D3,ATG7,UBE4B,FBXO8,USP33,UBE3A,RNF6,APC,SKP2,UBR3,CBLB,UBE2G2,ITCH,ARIH1,KIAA0368,MDM4,USE1,SMURF2,DERL2,PSEN1
Organ Morphology	5.58E-03-1.16E-02	FOXP2,RPGRIP1L,MSX2,PTEN,PTK2,POSTN,TXN,AHR,GLA,NAB1,BLOC1S3,FOXP1,MITF,IFT57,RAC1,ITGA5,FGFR2,DES,RCAN1,TTN,BMPR1B,MIB1,GRLF1,MAP2K3,INSR,NPR2,LGR4,ANGPT2,PKNOX1,FN1,LEPR,MEIS2,FKBP1A,PDGFC,NOG,ASB1,COL5A1,EDN1,RARB,TGFB2,MKL2,PRKCE,FABP3,CTNNB1,ADRB2,COL5A2,MKKS,GRB2,PPARD,TBX3,MAP3K1,GNAQ,MAPK8,DLC1,NF1,ISL1,KLF5,CDKN1A,PAFAH1B1,SIX3,PSEN1
Reproductive System Development and Function	5.82E-03-1.23E-02	IL6ST,LEPR,PDGFA,SMAD3,NF2,NPEPPS,PDE4D,STYX,PTK2,KLF9,UBE2B,NCOA2,ERBB4,HOXA10,TGFB2,SULT1E1,ASPH,SMAD1,NFE2L2,LHX9,FST,SLC12A2,FLT1,PTGS1,ZFX,TIAL1,FGFR2,THRA,AXL,UBE3A,CADM1,ZNF148,DDX3Y (includes EG:8653),PLA2G4A,GHR,IL1RN,CD44,INSR,PTGS2,THRB,ESR2,ACVR2A
Respiratory System Development and Function	6.17E-03-6.17E-03	PDPN,FGFR3,ATP7A,FOXP2,PDGFA,PTHLH,FBLN1,BMPR2,MAN1A2
Hematological Disease	6.76E-03-1.08E-02	KRAS,RB1,TPH1,SOD2,TXN,AHR,ITGB5,ATM,MCL1,TNFRSF9,DCN,TNFRSF10B,PGGT1B,SC4MOL,FGFR2,CHRNA10,THBD,IFNAR2,CAPN1,SNAI2,MAP2K3,RUNX1,CDC2L6,CFLAR,EVI1,PDE7A,LEPR,NUP214,JAK2,FNTB,CDK10,ANPEP,CD47,JUN,PROS1,RARB,SLC19A1,LPP,CTNNB1,IRF2,TUBB1,DCK,PTGS1,MAPK8,AXL,SOAT1,F3,PLA2G4A,DLEU2,CDKN1A,PTGS2,CDKN2A,LGALS3,RABEP1,CXCL1,FBXW7,MEIS1,MYH11,ABCG1,BCL6,PDE4D,PTEN,CDK8,RUNX2,IL8,HDAC4,MLLT10,HDAC8,THBS1…
Tissue Morphology	7.83E-03-1.02E-02	IL6ST,ZNF148,PTHLH,BRD4,TGFB2,ZFX,ITGA5,TIAL1,RPGRIP1L,IRX3,SMAD1
Visual System Development and Function	1.23E-02-1.23E-02	ROCK1,MAP3K1,MAPK8
