# Supplementary material for: Persistent Donor Cell Gene Expression among Human Induced Pluripotent Stem Cells Contributes to Differences with Human Embryonic Stem Cells
Source: PLoS One. 2010 Feb 1;5(2):e8975. doi: 10.1371/journal.pone.0008975 (PMC2813859; doi:10.1371/journal.pone.0008975)
Supplement: Table S2 — Functional analysis of the downregulated genes in (A) iPS-hFFib and hFFib; (B) iPS-hASC and hASC; (C) iPS-hNFib and hNFib and (D) iPS-hKT and hKT (0.17 MB XLS) [file pone.0008975.s006.xls]

## Sheet: S2-A
Table S2-A. Functional Analysis of the downregulated genes in iPS-hFFib and hFFib
Category	P-value	Molecules
Cell Death	1.47E-03-4.95E-02	DLL1,BMP2,IGF1R,PCBP2
Skeletal and Muscular System Development and Function	1.84E-03-4.31E-02	DLL1,BMP2,IGF1R,DSC2
Cancer	3.38E-03-4.95E-02	DLL1,ARID1A,BMP2,MYH14,IGF1R,RBBP6 (includes EG:5930),RNF160,BAT2D1,NPTX1,DCX,FUS
Cell Cycle	3.38E-03-4.92E-02	RSF1,ARID1A,ASPM,MYH14,BMP2,IGF1R,SKIL,DCX
Cell Morphology	3.38E-03-3.66E-02	BMP2,MYLIP,IGF1R,NPTX1,DCX
Cell-To-Cell Signaling and Interaction	3.38E-03-3.98E-02	ARID1A,BMP2,IGF1R,NPTX1
Cellular Assembly and Organization	3.38E-03-4.82E-02	RSF1,ARID1A,MYH14,BMP2,SLITRK4,MYLIP,SEMA6A,IGF1R,NPTX1,DCX
Cellular Development	3.38E-03-4.63E-02	EIF2AK4,DLL1,BMP2,IGF1R,SKIL
Connective Tissue Development and Function	3.38E-03-4.31E-02	BMP2,IGF1R,SKIL
Embryonic Development	3.38E-03-4.63E-02	DLL1,ASPM,BMP2,LEFTY1,IGF1R,SKIL
Gene Expression	3.38E-03-4.31E-02	SPEN,RSF1,DLL1,ARID1A,BCOR,JMJD1C,MGA,BMP2,RBBP6 (includes EG:5930),SKIL,DCX,FUS
Genetic Disorder	3.38E-03-3.33E-02	SNRPN,BMP2,IGF1R,DSC2,DCX
Nervous System Development and Function	3.38E-03-4.82E-02	ASPM,BMP2,SLITRK4,MYLIP,IGF1R,NPTX1,DCX
Neurological Disease	3.38E-03-4.95E-02	DLL1,ARID1A,GRIN2D,IGF1R,DCX,NPTX1
Organ Development	3.38E-03-1.01E-02	BMP2,DSC2
Organismal Development	3.38E-03-4.95E-02	DLL1,BMP2,IGF1R,SKIL
Renal and Urological System Development and Function	3.38E-03-1.01E-02	BMP2,IGF1R
Respiratory Disease	3.38E-03-3.98E-02	BMP2,MYH14,GRIN2D,IGF1R
Tissue Development	3.38E-03-4.63E-02	DLL1,BMP2
Tissue Morphology	3.38E-03-3.98E-02	BMP2,IGF1R
Carbohydrate Metabolism	6.75E-03-3.33E-02	GRPR,BMP2,PLA2G4C
Cell Signaling	6.75E-03-3.66E-02	GRPR,IGF1R
Cellular Function and Maintenance	6.75E-03-4.31E-02	BMP2,MYH14,SEMA6A,IGF1R,DSC2
Cellular Growth and Proliferation	6.75E-03-4.95E-02	DLL1,BMP2,IGF1R
Connective Tissue Disorders	6.75E-03-4.31E-02	BMP2,IGF1R
Developmental Disorder	6.75E-03-3.98E-02	SNRPN,IGF1R,DCX
Lipid Metabolism	6.75E-03-3.98E-02	PLA2G4C
Molecular Transport	6.75E-03-2.67E-02	GRPR,BMP2,PLA2G4C
Nucleic Acid Metabolism	6.75E-03-3.13E-02	GRPR,BMP2,IGF1R
Reproductive System Disease	6.75E-03-4.63E-02	BMP2,IGF1R,RBBP6 (includes EG:5930),RNF160,BAT2D1,NPTX1,DCX
Skeletal and Muscular Disorders	6.75E-03-4.63E-02	BMP2,IGF1R
Small Molecule Biochemistry	6.75E-03-3.98E-02	GRPR,BMP2,IGF1R,PLA2G4C
Endocrine System Development and Function	1.01E-02-1.35E-02	IGF1R
Hematological System Development and Function	1.01E-02-4.63E-02	EIF2AK4,DLL1,BMP2,IGF1R
Hematopoiesis	1.01E-02-3.66E-02	EIF2AK4,DLL1,BMP2,IGF1R
Organ Morphology	1.01E-02-3.98E-02	IGF1R,DSC2
Reproductive System Development and Function	1.01E-02-3E-02	IGF1R,DSC2
Digestive System Development and Function	1.19E-02-1.19E-02	BCOR,BMP2
Cardiovascular System Development and Function	1.35E-02-1.35E-02	BMP2
Cell-mediated Immune Response	1.35E-02-4.31E-02	EIF2AK4,DLL1,IGF1R
Gastrointestinal Disease	1.35E-02-3.98E-02	BMP2,FUS
Immunological Disease	1.35E-02-3E-02	IGF1R,PCBP2,FUS
Tumor Morphology	1.35E-02-1.35E-02	IGF1R,FUS
DNA Replication, Recombination, and Repair	1.68E-02-3.98E-02	RSF1,BMP2,IGF1R,FUS
Humoral Immune Response	1.68E-02-1.68E-02	DLL1
Hematological Disease	2.34E-02-2.34E-02	PCBP2
Hepatic System Disease	2.34E-02-4.95E-02	IGF1R
Cardiovascular Disease	2.67E-02-2.67E-02	DSC2
Endocrine System Disorders	3E-02-3E-02	IGF1R
Lymphoid Tissue Structure and Development	3E-02-3E-02	DLL1
Metabolic Disease	3E-02-3E-02	BMP2,IGF1R
Organismal Injury and Abnormalities	3E-02-3E-02	GRIN2D
Cellular Compromise	3.33E-02-3.66E-02	ARID1A,BMP2
Cellular Movement	3.33E-02-4.95E-02	IGF1R,DCX
Infectious Disease	3.33E-02-3.33E-02	GRIN2D
Renal and Urological Disease	3.33E-02-3.33E-02	GRIN2D
RNA Damage and Repair	3.66E-02-3.66E-02	BMP2
RNA Post-Transcriptional Modification	3.66E-02-3.66E-02	BMP2
Auditory Disease	3.71E-02-3.71E-02	MYH14,GRIN2D
Hair and Skin Development and Function	4.95E-02-4.95E-02	IGF1R

## Sheet: S2-B
Table S2-B. Functional Analysis of the downregulated genes in iPS-hASC and hASC
Category	P-value	Molecules
RNA Post-Transcriptional Modification	1.09E-06-3.58E-02	HNRNPH1,SRPK1,CDC42,SFRS4,SFPQ,EIF4A2,TRA2A,SFRS1,SNRPN,SFRS15,PRPF4B,CDC40,HNRNPC,ZNF638,RNGTT,GRSF1,TP53,BICD1,PNN,SFRS11,HNRNPD,PTBP1,BAT1,EIF4A1,U2AF1
Endocrine System Disorders	5.86E-05-3.58E-02	TGFBR1,SFPQ,MLLT4,C2ORF67,KRAS,SAMD12,ITPKB,GPD2,PTPRO,FRAS1,SMARCB1,HTR7,DMXL2,DIAPH2,GNA13,TP53,KIAA1324L,PTPRG,CTTNBP2NL,SPG7,CLASP2,RAD51L3,SPAST,SKP2,FAM126A,MED13L,FANCA,SPTBN1,BAT2,C10ORF28,CDC42,GNA14,MRPL30,LRRC58,UCHL1,SFRS15,RIF1,NCOA2,MYSM1,IGF1R,NAALAD2,UBE2D3,DHX9,PACSIN2,PRIM2,DST,HIP1,INPP5D,YLPM1,SVIL,B4GALT6,EDIL3,LDLR,BAT1,GUSBL2,CTDSPL2,IGF2BP2,FUT9,SMEK1,USP25,VPS13A,PBX1,ETV…
Cell Death	8.84E-05-3.58E-02	PHLDA1,PLP1,TGFBR1,PBX1,KRAS,MDH1,XRCC3 (includes EG:7517),RARG,XRCC2,IKBKB,ZNF124,WTAP,ITPKB,PTPRO,SMARCB1,CSNK2A1,CBFB,NSMAF,MCL1,TP53,PTPRG,EWSR1,CLC,FGFR1,TNFRSF10B,NFKB2,RAD51L3,SKP2,GSR,INPP4A,BCL2L1,MDM4,CDH1,RAPGEF2,PTPN11,SENP1,TRPS1,BAP1,PPAT,FANCA,CDK2,EPHX1,CDC42,DUSP6,MTMR1,DDX3X,UGCG,ACVR2B,INPP5A,OGT,SHC1,SERPINB9,BANF1,NCOA2,F2RL1,MTA1,IGF1R,SMAD4,FKBP8,DPPA4,FKBP5,PCBP2,MFN2,DHX9…
Connective Tissue Disorders	8.84E-05-3.58E-02	SPRED1,CDC42,TPR,PBX1,DDX3X,KRAS,EIF4G1,CHRM3,SHC1,XRCC2,IKBKB,MTA1,SMARCB1,IGF1R,CBFB,GNA13,NSMAF,MCL1,TP53,EWSR1,TAF15,FGFR1,EGR1,TNFRSF10B,NFKB2,RAD51L3,FUS,SKP2,BUB1,FAF1,BCL2L1,MDM4,CDH1,PTPN11,BCL11A,HELLS,SENP1,TRPS1,PIK3CB,SKIL,TRRAP,BCL2L11,EPHX1
Cell Morphology	1.01E-04-3.58E-02	PHLDA1,PBX1,MLLT4,MLL2,KRAS,CD46,STYX,IKBKB,SHROOM3,PEG10,GPD2,EZR,HTR7,CSNK2A1,EXOC5,ARHGEF11,CBFB,GNA13,ECT2,MCL1,PAPOLA,TP53,DLG1,CCNE2,EWSR1,MLLT10,FGFR1,TNFRSF10B,RDX,CLASP2,NFKB2,SKP2,IRF6,BCL2L1,CDH1,MDM4,PIP5K1A,PTPN11,TRRAP,CDK2,PVRL2,CDC42,TPR,CTNNA1,EIF4G1,PTPN12,CHRM3,SHC1,CCDC88A,F2RL1,MTA1,IGF1R,SMAD4,MFN2,NCKAP1,PXN,TAF15,PACSIN2,EGR1,GNAQ,TNKS2,HIP1,EDIL3,NF1,BCL11A,PIK3CB,CDC42SE…
Connective Tissue Development and Function	1.01E-04-3.58E-02	CDC42,ARHGEF7,GTF2I,TPR,DDX3X,KRAS,PTPN12,XRCC2,IKBKB,PEG10,HTR7,SMARCB1,CSNK2A1,IGF1R,ARHGEF11,GNA13,TFE3,TP53,EWSR1,TNFRSF10B,HIP1,INPP5D,SKP2,CDH1,MDM4,PTPN11,CDC42SE2,SKIL,PPAT,FANCA,CDK2
Cell Cycle	1.54E-04-3.58E-02	SRPK1,CUL4A,CSNK1A1,KRAS,MKI67,GPSM2,XRCC3 (includes EG:7517),RARG,SMC1A,SOX2,XRCC2,IKBKB,PTPRO,L3MBTL,SMARCB1,MPHOSPH9,CSNK2A1,DIAPH2,GNA13,ECT2,TFE3,NUCKS1,TP53,DLG1,CCNE2,EWSR1,YWHAE,FGFR1,PNN,SH3BP2,RAD51L3,SKP2,BCL2L1,MDM4,CDH1,NASP,ZFR,PTPN11,HELLS,BAP1,TFRC,SPTAN1,TMPO,TRRAP,CDK2,FANCA,ARID1A,CDC42,GTF2I,TPR,DDX3X,CHRM3,TGIF1,SHC1,ASPM,CIT,IGF1R,SMAD4,UBE2D3,MFN2,CALR,EGR1,ATRX,PRDM5,PLK1,…
Cancer	1.59E-04-3.58E-02	ST6GAL1,TGFBR1,TWF1,RAB2A,NUP133,MLLT4,KRAS,XRCC2,GPD2,PTPRO,EZR,SMARCB1,CSNK2A1,EXOC5,CDC40,CBFB,GNA13,MCL1,TP53,PTPRG,CCNE2,WAPAL,NKTR,TNFRSF10B,NFKB2,TRAPPC1,SPAST,GART,SKP2,CDH1,PATZ1,TFRC,TRRAP,FANCA,SPTBN1,ANAPC2,CDC42,CTNNA1,ACVR2B,EIF4G1,PTPN12,LEFTY1,IGF1R,FKBP8,UBE2D3,FKBP5,ALDH5A1,HNRNPU,FGD6,PRIM2,EGR1,TRIM28,GNAQ,PLK1,HIP1,INPP5D,CDC2,FUS,BUB1,LDLR,DLEU2,BCL11A,PELI1,EIF4A1,FAM76B,SM…
Dermatological Diseases and Conditions	1.59E-04-5.98E-03	TP53,PHLDA1,IKBKB,CDH1,PTPN11,CDC42,MTA1,TNFRSF10B,PBX1,IGF1R
Cellular Assembly and Organization	1.77E-04-3.58E-02	TGFBR1,SRPK1,NUP133,KRAS,GPSM2,SMC1A,XRCC2,SHROOM3,EZR,HTR7,DIAPH2,GNA13,ECT2,MCL1,TP53,DLG1,LCP1,TUBGCP3,TNFRSF10B,RDX,RAD51L3,SKP2,BCL2L1,CDH1,PTPN11,HELLS,TRRAP,CDC42,TRIP10,CTNNA1,RANBP2,INPP5A,PTPN12,MCM4,SHC1,CCDC88A,F2RL1,UTRN,NCKAP1,PPP1R9A,CALR,PXN,PPIA (includes EG:5478),PACSIN2,DST,ATRX,PLK1,HIP1,TUBGCP2,CEP350,NF1,AKAP9,BCL2L11,ARHGAP8
Organismal Injury and Abnormalities	1.78E-04-3.54E-02	TP53,IKBKB,SHC1,CEL,SPRED1,LDLR,MTA1,EGR1,SMAD4,KRAS
Organismal Development	2.81E-04-3.58E-02	TGFBR1,PBX1,TLE1,MLLT4,KRAS,MLL2,RARG,AKIRIN2,STYX,FDFT1,XRCC2,SFRS1,PLK4,GPD2,SMARCB1,CBFB,GNA13,TFE3,MCL1,TP53,TJP2,CLC,FGFR1,APLP2,GCNT2,XAB2,BCL2L1,NASP,MDM4,ZFR,PTPN11,HELLS,PGAP1,CTNNA1,LIMD1,LEFTY2,CHRM3,TGIF1,NCOA2,CIT,IGF1R,SMAD4,FKBP8,HNRNPC,DHX9,NCKAP1,CALR,TRIM28,GNAQ,CSDA,HIP1,PSME3,CLPTM1,PIK3CB,CHD7,BCL2L11
Gene Expression	4.2E-04-3.58E-02	TGFBR1,JMJD1C,CUL4A,PBX1,TLE1,ETV1,SFPQ,EIF4A2,KRAS,NFATC2IP,RARG,AKIRIN2,SOX2,IKBKB,SMARCB1,MATR3,XPO1,CBFB,ZNF254,ARHGEF11,TFE3,BRIP1,ECT2,CREBZF,TP53,EWSR1,BCOR,FGFR1,TNFRSF10B,NFKB2,XAB2,BCL2L1,MDM4,CDH1,PATZ1,SSBP1,PTPN11,SUPT16H,SENP1,TRPS1,TMPO,RBM39,TRRAP,CDK2,RBAK,SNAPC3,ARID1A,GTF2I,MCM3AP,LIMD1,ACVR2B,CHRM3,ZMYND11,TGIF1,OGT,SHC1,TARBP1 (includes EG:6894),AP1G2,NCOA2,NFYA,MTA1,POLR3G,S…
Hematological Disease	4.33E-04-3.58E-02	SPRED1,PBX1,KRAS,RARG,IKBKB,FDFT1,HSP90B1,SMAD4,UBE2D3,CBFB,RBM15,BRIP1,PCBP2,MCL1,TP53,MLLT10,FGFR1,EGR1,PRIM2,PDE4B,INPP5D,CDC2,BCL2L1,DLEU2,PTPN11,NF1,FANCA,PPAT,BCL2L11,CDK2
Cellular Function and Maintenance	4.98E-04-3.11E-02	TGFBR1,CDC42,TRIP10,CTNNA1,KRAS,INPP5A,SHC1,CCDC88A,F2RL1,EZR,DIAPH2,GNA13,MCL1,TP53,DLG1,LCP1,PXN,PPIA (includes EG:5478),PACSIN2,EGR1,RDX,HIP1,PSME3,PTPN11,NF1,BAP1
Infectious Disease	5.56E-04-2.39E-02	ANAPC2,YTHDC2,SPTBN1,HNRNPH1,TWF1,ARID1A,AFG3L1,RAB2A,NUP133,RANBP2,DDX3X,CD46,RNF26,TMEM63A,LARS,AP1G2,GPD2,LEFTY1,XPO1,CDC40,ZNF254,TFE3,NCKAP1,FBXW11,HNRNPU,MDN1 (includes EG:23195),FGD6,GM2A,CEP68,SLC4A7,SPG7,PLK1,MED6,XAB2,TRAPPC1,SPAST,HTATSF1,LDLR,PCGF1,BCL11A,PELI1,TFRC,SPTAN1,FAM76B,RAB6A
Reproductive System Disease	5.56E-04-3.58E-02	TWF1,RAB2A,AFG3L1,NUP133,PBX1,MLL2,KRAS,CD46,RNF26,SMC1A,SOX2,LARS,GPD2,EZR,XPO1,CDC40,ECT2,TFE3,TP53,FBXW11,PTPRG,EWSR1,MDN1 (includes EG:23195),GM2A,TNFRSF10B,SLC4A7,TRAPPC1,SPAST,SKP2,IRF6,BCL2L1,CDH1,NASP,PCGF1,TFRC,SPTAN1,TRRAP,CDK2,SPTBN1,YTHDC2,ANAPC2,CDC42,RANBP2,UGCG,DDX3X,SHC1,NCOA2,MTA1,LEFTY1,IGF1R,SMAD4,CALR,HNRNPU,FGD6,TRIM28,EGR1,PRDM5,PLK1,HIP1,MED6,CDC2,HTATSF1,LDLR,NF1,PELI1,FAM…
Neurological Disease	8.14E-04-3.58E-02	GABRA5,PLP1,C18ORF25,PBX1,KRAS,EIF4A2,MDH1,RARG,DHX35,ZNF652,XRCC2,IKBKB,SHROOM3,MATR3,USP10,MPHOSPH9,DIAPH2,GNA13,LARP1B,RNGTT,COL27A1,NSMAF,SSBP3,MCL1,TP53,PGK1,CUL4B,EWSR1,APLP2,TNFRSF10B,GCNT2,ENOSF1,SPG7,PDE4B,SPAST,WWP2,FAM126A,BCL2L1,PIP5K1A,RPS6KA6,RAPGEF2,FGD5,PCGF3,TRPS1,BAT2,TRMT2B,GALC,CDC42,ARHGEF7,DDX3X,UGCG,GPC4,GNA14,PTPN12,CHRM3,TGIF1,UCHL1,OGT,F2RL1,BRWD3,SOX3,MKLN1,IGF1R,NAALAD…
Carbohydrate Metabolism	8.42E-04-2.39E-02	INPP4A,PIK3C2A,MTMR1,PIK3CB,INPP5D
Immunological Disease	8.42E-04-3.48E-02	ST6GAL1,GABRA5,TGFBR1,RAB2A,SFPQ,KRAS,XRCC2,SAMD12,ITPKB,PTPRO,GPD2,FRAS1,SMARCB1,GNA13,MCL1,TP53,LCP1,TNFRSF10B,SPG7,NFKB2,RAD51L3,FAM126A,GART,CDH1,MED13L,TFRC,TRRAP,FANCA,BAT2,GNA14,MRPL30,LRRC58,MPPED2 (includes EG:744),NCOA2,MYSM1,F2RL1,IGF1R,NAALAD2,PCBP2,FKBP5,ALDH5A1,DHX9,CD276,EGR1,PACSIN2,PRIM2,LRSAM1,HIP1,INPP5D,SVIL,EDIL3,BAT1,GUSBL2,FUT9,PLP1,C12ORF35,PBX1,EXOC6,SFRS1,IKBKB,SNRPN,SDA…
Lipid Metabolism	8.42E-04-3.58E-02	PIK3C2A,CYP26A1,GM2A,GNAQ,MTMR1,UGCG,RARG,INPP5D,INPP4A,CEL,PIP5K1A,B4GALT6,LDLR,PTPN11,PIK3CB,NSMAF,ALDH5A1,CYP2S1
Respiratory Disease	8.42E-04-3.31E-02	TP53,TNRC6B,PPIA (includes EG:5478),YWHAE,KRAS,PLK1,RARG,CDC2,GART,FDFT1,HSP90B1,MDM4,PTPN11,PTPRO,EIF4A1,BAP1,SMEK1
Small Molecule Biochemistry	8.42E-04-3.58E-02	GRPR,CDC42,CYP26A1,RANBP2,MTMR1,UGCG,KRAS,GPSM2,RARG,CHRM3,CEL,NAALAD2,GNA13,NSMAF,ALDH5A1,CALR,PIK3C2A,GM2A,PMCH,GNAQ,CDC2,INPP5D,INPP4A,PIP5K1A,B4GALT6,LDLR,PTPN11,NF1,PIK3CB,CYP2S1
Reproductive System Development and Function	8.98E-04-3.11E-02	DLG1,EWSR1,PBX1,MLLT4,KRAS,CHRM3,XRCC3 (includes EG:7517),CDH1,PLK4,PEG10,HELLS,SMARCB1,CSNK2A1,DSC2,CHD7,CDK2,MCL1
Tumor Morphology	9.18E-04-3.11E-02	TP53,PGK1,MLLT10,EGR1,TPR,PBX1,KRAS,HIP1,NFKB2,FUS,SKP2,BUB1,BCL2L1,XRCC2,MDM4,CDH1,NF1,SMARCB1,SMAD4,EXOC5,SKIL,CDK2,MCL1
Cellular Movement	1.03E-03-2.39E-02	TP53,ST6GAL1,PXN,CDC42,APLP2,FGFR1,PLK1,PTPN12,PKN1,CCDC88A,NF1,PTPN11,L3MBTL,CIT,SMARCB1,DIAPH2,ECT2,TRRAP,AKAP9
Cell Signaling	1.28E-03-2.39E-02	TP53,CALR,PXN,TGFBR1,GRPR,CDC42,PMCH,GNAQ,RANBP2,KRAS,CASK,TUBGCP2,GPSM2,CHRM3,CDC2,EPRS,FAF1,MDM4,NF1,GNA13,FANCA
Cell-To-Cell Signaling and Interaction	1.28E-03-3.58E-02	TP53,DLG1,CDC42,CTNNA1,MLLT4,KRAS,PTPN12,RAMP2,OGT,BCL2L1,CDH1,HSP90B1,IGF1R,GNA13,PVRL2
Molecular Transport	1.28E-03-2.89E-02	AP2A1,GRPR,RAB2A,TPR,MCM3AP,NUP133,RANBP2,KRAS,AP1G2,FRAS1,XPO1,RPAIN,CALR,KPNA4,AGFG1 (includes EG:3267),XPO7,GNAQ,HNRNPD,CASK,HIP1,LMAN1,INPP5D,INPP4A,PIP5K1A,PTPN11,BAT1,RAB6A
Nucleic Acid Metabolism	1.28E-03-2.39E-02	CALR,GRPR,NF1,CDC42,RANBP2,GNAQ,PMCH,KRAS,GNA13,GPSM2,CHRM3,CDC2
Skeletal and Muscular Disorders	1.28E-03-3.58E-02	TP53,EWSR1,DUSP6,PRIM2,TNFRSF10B,GNAQ,MDH1,RAMP2,RARG,CDC2,GART,BCL2L1,FDFT1,XRCC2,SHC1,LDLR,WTAP,IGF1R,BCL2L11,MFN2,CDK2,MCL1
Tissue Development	1.28E-03-3.58E-02	TP53,DLG1,ARHGEF7,CYP26A1,SH3BP2,ACVR2B,HIP1,TGIF1,SHC1,IKBKB,FDFT1,BCL2L1,HSP90B1,CDH1,SHROOM3,F2RL1,NF1,HECTD1,NCKAP1
Cellular Growth and Proliferation	1.49E-03-3.11E-02	PHLDA1,PLP1,TGFBR1,MLL2,KRAS,RARG,XRCC3 (includes EG:7517),AKIRIN2,SOX2,IKBKB,SFRS1,XRCC2,PLK4,PEG10,PTPRO,EZR,SMARCB1,CSNK2A1,CBFB,TFE3,MCL1,TP53,PGK1,FBXW11,LCP1,PTPRG,EWSR1,METTL3,FGFR1,PNN,USP9X,CNOT6L,NFKB2,HNRNPM,PKN1,SKP2,TAF9B,BCL2L1,INPP4A,MDM4,CDH1,FLOT2,PATZ1,PTPN11,SENP1,TFRC,BAT2D1,TRRAP,PPAT,FANCA,CDK2,CDC42,GTF2I,DUSP6,TPR,SEMA6A,DDX3X,EIF4G1,CHRM3,TGIF1,PRKCSH,TRA2A,SHC1,HSP90B1,F…
Hepatic System Disease	1.52E-03-2.89E-02	TP53,EWSR1,TNFRSF10B,PRDM5,ACVR2B,INPP5D,FDFT1,LDLR,IGF1R,CSNK2A1,SMAD4,BCL2L11,ZFYVE16,MCL1
Cellular Compromise	1.94E-03-2.39E-02	ANAPC2,YTHDC2,SPTBN1,HNRNPH1,TWF1,ARID1A,AFG3L1,RAB2A,NUP133,RANBP2,DDX3X,CD46,RNF26,PTPN12,TMEM63A,LARS,AP1G2,GPD2,LEFTY1,XPO1,CDC40,ZNF254,TFE3,NCKAP1,FBXW11,PXN,HNRNPU,MDN1 (includes EG:23195),FGD6,GM2A,CEP68,SLC4A7,SPG7,PLK1,MED6,XAB2,TRAPPC1,SPAST,HTATSF1,LDLR,PCGF1,BCL11A,PELI1,TFRC,SPTAN1,FAM76B,RAB6A
DNA Replication, Recombination, and Repair	2.24E-03-3.58E-02	SRPK1,CDC42,MCM3AP,POLQ,RANBP2,ASF1A,KPNA1,GPSM2,XRCC3 (includes EG:7517),MCM4,SMC1A,XRCC2,CCDC88A,BANF1,NCOA2,SMARCB1,IGF1R,ECT2,RPAIN,TP53,CALR,CCNE2,EWSR1,PRIM2,ATRX,GNAQ,PLK1,RAD51L3,XAB2,FUS,CDC2,SKP2,BUB1,BCL2L1,NASP,CDH1,MDM4,NF1,HELLS,TMPO,N4BP2,TRRAP,CDK2,FANCA
Protein Trafficking	2.67E-03-1.24E-02	CALR,KPNA4,AP2A1,YWHAE,RAB2A,MCM3AP,TPR,RANBP2,XPO7,KRAS,HIP1,CASK,GPHN,LMAN1,PIP5K1A,AP1G2,PTPN11,FRAS1,XPO1,RAB6A,MFN2,ZFYVE16,RPAIN
Gastrointestinal Disease	2.79E-03-3.58E-02	TP53,ST6GAL1,PXN,SRPK1,YWHAE,PTPN12,MCM4,IKBKB,CCDC88A,PTPN11,NF1,TFRC,UBA1
Developmental Disorder	3.75E-03-3.26E-02	GABRA5,RAB2A,GTF2I,CYP26A1,PGAP1,ARHGEF7,PBX1,KRAS,PTPN12,TGIF1,SMC1A,SOX2,FDFT1,SNRPN,IKBKB,BRWD3,NCOA2,SOX3,FRAS1,IGF1R,UTRN,SMAD4,NIPBL,GNA13,EHMT1,TFE3,TP53,DLG1,CUL4B,PXN,YWHAE,BCOR,APLP2,FGFR1,ATRX,GNAQ,SH3BP2,NFKB2,HIP1,PSME3,INPP5D,SKP2,IRF6,PTPN11
Embryonic Development	3.75E-03-3.58E-02	TGFBR1,CYP26A1,PBX1,CTNNA1,MLL2,ACVR2B,RARG,TGIF1,AKIRIN2,FDFT1,IKBKB,XRCC2,SFRS1,SHROOM3,SMARCB1,IGF1R,SMAD4,FKBP8,DPPA4,GNA13,MCL1,NCKAP1,TP53,TJP2,PNN,CER1,FGFR1,APLP2,GNAQ,CSDA,PLK1,XAB2,BCL2L1,CDH1,NASP,NF1,HECTD1,PIK3CB,CHD7,BCL2L11
Genetic Disorder	3.75E-03-3.58E-02	ST6GAL1,GABRA5,RAB2A,SFPQ,KRAS,SAMD12,ITPKB,PTPRO,GPD2,FRAS1,SMARCB1,AMMECR1,CBFB,GNA13,MCL1,TP53,LCP1,TNFRSF10B,SPG7,NFKB2,RAD51L3,SPAST,FAM126A,GART,CDH1,MED13L,TFRC,TRRAP,FANCA,BAT2,ARHGEF7,GNA14,MRPL30,LRRC58,MPPED2 (includes EG:744),BRWD3,MYSM1,F2RL1,NCOA2,IGF1R,NAALAD2,FKBP5,ALDH5A1,DHX9,CD276,PACSIN2,PRIM2,LRSAM1,GDAP1,HIP1,INPP5D,SVIL,LDLR,EDIL3,GUSBL2,BAT1,FUT9,PLP1,C12ORF35,PBX1,EXOC6,R…
Hematological System Development and Function	3.75E-03-3.58E-02	TGFBR1,PLP1,CUL4A,PBX1,KRAS,RARG,SHC1,IKBKB,HSP90B1,ITPKB,F2RL1,NFYA,IGF1R,CBFB,RBM15,GNA13,MCL1,TP53,EWSR1,MLLT10,EGR1,GNAQ,SH3BP2,NFKB2,LMAN1,INPP5D,FUS,BCL2L1,MDM4,LDLR,PATZ1,PTPN11,BCL11A,HELLS,PIK3CB,CHD7,FANCA,BCL2L11
Hematopoiesis	3.75E-03-3.58E-02	TP53,CUL4A,PBX1,SH3BP2,RARG,INPP5D,SHC1,BCL2L1,NFYA,IGF1R,CBFB,FANCA,BCL2L11
Organ Development	3.75E-03-3.11E-02	TP53,DLG1,TGFBR1,CYP26A1,FGFR1,PBX1,ACVR2B,NFKB2,MDM4,CDH1,NF1,SMAD4,CBFB,DSC2,CHD7,BCL2L11
Organ Morphology	3.75E-03-3.75E-03	CDH1,DSC2
Renal and Urological Disease	3.75E-03-3.58E-02	COL4A5,FGFR1,SMARCB1,AMMECR1
Tissue Morphology	3.75E-03-3.11E-02	TP53,PBX1,NFKB2,RARG,TGIF1,SHC1,IKBKB,SHROOM3,LDLR,HECTD1,FKBP8,GNA13,BCL2L11,FANCA,NCKAP1
Nervous System Development and Function	4.11E-03-3.11E-02	TP53,GSR,NF1,F2RL1,ARHGEF7,HIP1,PSME3
Humoral Immune Response	4.54E-03-3.58E-02	TP53,IKBKB,SH3BP2,NFKB2,GNA13,BCL2L11,INPP5D
Cellular Development	5.02E-03-3.14E-02	CUL4A,PBX1,MLL2,KRAS,RARG,IKBKB,XRCC2,SHROOM3,EZR,HTR7,SMARCB1,EXOC5,ARHGEF11,CBFB,GNA13,TFE3,ECT2,MCL1,TP53,DLG1,FGFR1,TNFRSF10B,RDX,NFKB2,CLASP2,SKP2,BCL2L1,INPP4A,MDM4,CDH1,PIP5K1A,PTPN11,HELLS,CDK2,PPAT,FANCA,PVRL2,SPRED1,CDC42,TPR,CTNNA1,PTPN12,SHC1,CCDC88A,NFYA,IGF1R,SMAD4,RBM15,DPPA4,NCKAP1,PXN,GNAQ,INPP5D,EDIL3,NF1,CDC42SE2,BCL2L11
Digestive System Development and Function	5.99E-03-2.39E-02	MDM4,TGFBR1,BCOR,CBFB,ACVR2B,CHD7
Endocrine System Development and Function	7.32E-03-7.32E-03	BCL2L1,IGF1R
Hair and Skin Development and Function	7.32E-03-3.11E-02	PNN,PLK1,TFE3,AKAP9,CDK2
Metabolic Disease	7.32E-03-3.48E-02	TGFBR1,SFPQ,MLLT4,C2ORF67,SAMD12,ITPKB,GPD2,PTPRO,FRAS1,SMARCB1,HTR7,DMXL2,GNA13,TP53,KIAA1324L,PTPRG,CTTNBP2NL,SPG7,CLASP2,RAD51L3,FAM126A,MED13L,FANCA,SPTBN1,BAT2,C10ORF28,CDC42,GNA14,MRPL30,LRRC58,UCHL1,SFRS15,RIF1,NCOA2,MYSM1,NAALAD2,UBE2D3,DHX9,PRIM2,PACSIN2,DST,HIP1,INPP5D,YLPM1,SVIL,B4GALT6,LDLR,EDIL3,BAT1,GUSBL2,CTDSPL2,IGF2BP2,FUT9,SMEK1,USP25,VPS13A,ETV1,SNRPN,CEL,SDAD1,ARHGEF11,DSC2,BR…
Nutritional Disease	7.32E-03-7.32E-03	TP53,LDLR
Ophthalmic Disease	7.32E-03-7.32E-03	SOX2,FRAS1
Cardiovascular Disease	1.19E-02-2.93E-02	TP53,SHC1,IKBKB,MDM4,LDLR,PTPN11,GNAQ,IGF1R,MFN2
Organismal Functions	1.19E-02-1.19E-02	SHC1,LDLR
Renal and Urological System Development and Function	1.22E-02-1.22E-02	TP53,DLG1,TGFBR1,NF1,FGFR1,CYP26A1,SMAD4,ACVR2B,BCL2L11
Post-Translational Modification	1.3E-02-3.58E-02	TP53,FAF1,MDM4,SHROOM3,TGFBR1,CDC42,CASK,TUBGCP2,FANCA,EPRS
Protein Synthesis	1.3E-02-1.3E-02	TP53,FAF1,MDM4,TGFBR1,CDC42,CASK,TUBGCP2,FANCA,EPRS
Behavior	1.71E-02-1.71E-02	UCHL1,GABRA5,GRPR,PLP1,NF1,AAAS,EGR1,GM2A,PMCH,KRAS,VDAC3,CHD7
Antigen Presentation	1.75E-02-1.75E-02	SHC1,LDLR
Inflammatory Response	1.75E-02-1.75E-02	SHC1,LDLR
RNA Trafficking	1.75E-02-2.89E-02	AGFG1 (includes EG:3267),BAT1,EIF4A1,NUP133,EIF4A2
Skeletal and Muscular System Development and Function	1.75E-02-3.58E-02	TP53,TGFBR1,FGFR1,ARHGEF7,TNFRSF10B,HIP1,INPP5D,SKP2,IKBKB,HSP90B1,F2RL1,NCOA2,IGF1R,MFN2
Infection Mechanism	1.86E-02-2.99E-02	TP53,SFRS1,NCOA2,CDC42,SMARCB1,NFKB2,GNA13,RARG
Drug Metabolism	2.14E-02-2.14E-02	CYP26A1,RARG,CYP2S1
Vitamin and Mineral Metabolism	2.14E-02-2.14E-02	CYP26A1,RARG,CYP2S1
Lymphoid Tissue Structure and Development	2.38E-02-2.38E-02	TGFBR1,PBX1,NFKB2,BCL2L11
Hepatic System Development and Function	2.39E-02-2.39E-02	MDM4,CBFB
Organismal Survival	2.85E-02-2.85E-02	TP53,XRCC2,CYP26A1,KRAS,RARG,FUS
Cell-mediated Immune Response	3.11E-02-3.11E-02	TP53,BCL2L11
RNA Damage and Repair	3.11E-02-3.11E-02	RBM8A,HNRNPD
Antimicrobial Response	3.58E-02-3.58E-02	LDLR
Cardiovascular System Development and Function	3.58E-02-3.58E-02	F2RL1
Immune Cell Trafficking	3.58E-02-3.58E-02	SH3BP2
Inflammatory Disease	3.58E-02-3.58E-02	IKBKB

## Sheet: S2-C
Table S2-C. Functional Analysis of the downregulated genes in iPS-hNFib and hNFib
Category	P-value	Molecules
Gene Expression	1.27E-05-2.3E-02	SOCS1,GTF3C2,SFPQ,FOXK2,POLRMT,EEF1D,CHAF1A,LCK,PAK1,PEG10,CRYM,THRAP3,SMARCB1,MYB (includes EG:4602),TGIF2,ZNF254,SAFB,TBL1XR1,MYBBP1A,PKIA,TEAD2,CR2,TP53,NFE2L3,SMAD2,PRKCQ,MYST2,BCOR,FOXH1,HIRA,ITGA6,FUBP1,KLF13,TCF3,OTX2,BRD7,CDH1,CCND2,PATZ1,SYK,SUPT16H,HTT,SFRP1,PPP5C,TRRAP,PBX2,PNKP,LIMD1,IKZF1,ACVR2B,SMARCA4,NARG1,TRERF1,YY1,TRIM27,TOP2A,POLR3G,CTNNB1,LIG3,PRKDC,GTF3C1,ZNF398,TNFSF11,RSF1…
Nervous System Development and Function	2.32E-05-1.93E-02	PRKACB,KCND2,MYH10,SERPINI1,DPYSL4,SH3GL2,GRIA4,NPTX1,SOX2,CTNNA2,GRIK5,CASP9,STRN4,RORA,KIF1A,HTR7,DLG4,CALB1,RTN4R,TP53,SOX4,MYO6,SLC1A6,NOVA1,YWHAE,HESX1,ITGA6,VLDLR,NPY5R,OTX2,NRXN1,EIF2AK4,SMARCA1,MDM4,CDH1,CCND2,CSPG5,CCNF,HTT,DTNA,PCDHB5,INSR,SYT1,SNCA,GJC1,DLGAP1,SPTBN1,JPH3,NLGN1,GRIN2D,PCDHB3,BCR,IKZF1,HMX2,PTPN5,PTPRF,SMARCA4,LLGL1,SOX3,CIT,SMO,NHLH2,CACNB2,BPTF,CTNNB1,ZIC5,NCKAP1,PRKD…
Endocrine System Disorders	3.95E-05-1.69E-02	HLA-DOA,MLLT4,CCDC88C,KIF13A,FRAS1,SMARCB1,C20ORF94,EXOC2,AIF1,CALB1,TP53,SORL1,ATP8A2,NRXN1,SYK,ST6GAL2,CYCS (includes EG:54205),FANCA,DLGAP1,ANK3,SCG3,TMEM132D,CD74,SMARCA4,LOC342892,ZNF649,PTPRJ,TRIM27,RMST (includes EG:196475),CDH3,PHF17,MOBKL2B,PRKDC,TNFSF11,MEGF10,WDR36 (includes EG:134430),UCP2,UTP20,TJP1,DST,TPK1,MLF1,HIP1,WDR59,INO80D,LAMC2,INPP5D,HS3ST4 (includes EG:9951),PDZD2,IGSF21,M…
Metabolic Disease	3.95E-05-2.3E-02	HLA-DOA,RRM2B,MLLT4,CCDC88C,KIF13A,FRAS1,SMARCB1,C20ORF94,EXOC2,AIF1,CALB1,CLN6,TP53,SORL1,TCF3,VLDLR,ATP8A2,NRXN1,SYK,ST6GAL2,FANCA,DLGAP1,ANK3,SCG3,TMEM132D,CD74,SMARCA4,LOC342892,ZNF649,PTPRJ,TRIM27,RMST (includes EG:196475),PHF17,MOBKL2B,ATP7B,PRKDC,TNFSF11,MEGF10,WDR36 (includes EG:134430),UCP2,TJP1,UTP20,DST,TPK1,MLF1,HIP1,WDR59,INO80D,LAMC2,INPP5D,HS3ST4 (includes EG:9951),PDZD2,IGSF21,MAG…
Cancer	4.82E-05-2.3E-02	ST6GAL1,HNRNPH1,MYH10,HLA-DOA,RRM2B,MLLT4,TUBB4,NPTX1,LCK,BOP1,TRAF4,SMARCB1,EXOC2,MYB (includes EG:4602),TNFRSF10C,ZNF254,MYBBP1A,CALB1,ALDOC,TP53,SMAD2,LCP1,PRKCQ,TNNC2,ITGA6,FUBP1,TCF3,CDH1,SYT13,SYK,NUP43,CYCS (includes EG:54205),TRRAP,PPP5C,FANCA,ANK3,EIF2S3,PNKP,LIMD1,CD74,SMARCA4,CCT4,PTPN4,PTPRJ,CDH3,INPP5B,PRDM14,PRKD2,KLK10,ATP7B,PRKDC,TNFSF11,UCP2,TJP1,CHGA,DST,TPK1,GDAP1,MLF1,HIP1,VDA…
DNA Replication, Recombination, and Repair	8.24E-05-2.3E-02	LIG1,DDX25,DNMT3A,RRM2B,TDP1,CBX5,C16ORF5,CHAF1A,TOP1,CASP9,ABCC1,SMARCB1,MYB (includes EG:4602),PMAIP1,TOP3B,MYO6,TP53,ASF1B,MTA2,AURKA,XAB2,SMARCA1,UBR5,SYK,H2AFX,HTT,SNCA,FANCA,BUB3,PNKP,SUV39H2,HDAC9 (includes EG:9734),BCR,RAD9A,ASF1A,IKZF1,SMARCA4,MCM4,CSNK1E,YY1,BANF1,FANCD2,CIT,TOP2A,KIT,RERE,BPTF,RPAIN,LIG3,ATP7B,NAP1L4,PRKDC,RSF1,ATRX,PLK1,BAX,NCAPD2,CDC2,TAF6L,TLK1,ATF7IP,BRCA2,SMARCC1,…
Cell Cycle	1.35E-04-2.3E-02	SOCS1,RRM2B,CHAF1A,PAK1,LCK,CCNA1,SMARCB1,CSNK2A1,MYB (includes EG:4602),MAP1S,AIF1,MATK,TP53,ASF1B,PRKCQ,HIRA,FUBP1,PTOV1,TCF3,SMARCA1,CDH1,CCND2,CCNF,SYK,HTT,CHKA,PPP5C,TRRAP,FANCA,CDT1,SUV39H2,IKZF1,ASF1A,SMARCA4,YY1,TOP2A,RERE,CTNNB1,NAP1L4,RSF1,EGR1,MAPK8,PLK1,MLF1,NCAPD2,CDC2,INPP5D,BUB1,DGKZ,TLK1,BMP7,JAK3,ID4,PRKCB,LIG1,JMY,VPRBP,BIRC5,POLE,SOX2,TOP1,MAP2K2,NEDD4L,CDC25A,SPP1,YWHAE,WEE1,M…
Cardiovascular Disease	1.64E-04-2.1E-02	MYH10,ADAMTS8,GTPBP1,RRM2B,TUBB4,SLC39A8,RNF182,LCK,KIF13A,FRAS1,EXOC2,TNFRSF10C,PRKCQ,C3ORF37,ITGA6,MUC19 (includes EG:283463),VLDLR,ATP8A2,NRXN1,SYK,ST6GAL2,ANK3,TMEM132D,SMARCA4,MPPED2 (includes EG:744),CGNL1,RERE,MOBKL2B,ZNF398,UTP20,DST,MLF1,TPK1,HIP1,GIT2,PDZD2,IGSF21,MGAT4A,MAGI1,DDX18,BMP7,CDCP1,UBE3B,PIP5K1B,TDP1,SNRPN,CTNNA2,CYFIP2 (includes EG:26999),MAP2K2,EXOSC3,METT10D,LSR,LPL,PHF20…
Genetic Disorder	1.64E-04-2.3E-02	ST6GAL1,ADAMTS8,MLLT4,POLRMT,SLC39A8,LCK,SMARCB1,TRAF4,EXOC2,SAFB,TNFRSF10C,AIF1,SART3,SORL1,ITGA6,TCF3,OTX2,NRXN1,GSTCD,TRRAP,FANCA,DLGAP1,EIF2S3,CHST6,JPH3,CTTNBP2,SMARCA4,TNFSF11,ZNF398,UCP2,ATXN7L1,UTP20,LAMC2,HS3ST4 (includes EG:9951),GIT2,PDZD2,MAGI1,EDIL3,TLK1,CBS,SEPHS1,PRKACB,LIG1,HYAL2,ETV1,IGSF5,TDP1,SLC6A15,DHX35,SOX2,CYFIP2 (includes EG:26999),STRN4,EXOSC3,FGFR4,CHD2,MATR3,EEF1E1,ACT…
Organ Development	2.69E-04-1.7E-02	TAF4B,MYH10,DNMT3A,RRM2B,SOX2,CTNNA2,PEG10,CASP9,RORA,LSR,FRAS1,FGFR4,FABP7,DSC2,TP53,SOX4,SMAD2,OVOL2,COL9A1,YWHAE,PKP2,BCOR,PCSK5,HIRA,HESX1,ITGA6,OTX2,IRF6,SMARCA1,MDM4,BMPR1B,CDH1,CCND2,PDLIM3,CCNF,ETV4,SYK,HTT,RLN2,FZD5,INSR,GJC1,FANCA,ETV5,PDPN,SPTBN1,PDGFA,BCR,HDAC9 (includes EG:9734),IKZF1,ACVR2B,FOXD3,HMX2,IGF2BP1,SMARCA4,DHCR7,YY1,SP1,PTPRJ,LLGL1,MTA1,SOX3,SMO,SMAD4,BPTF,CTNNB1,ZIC5,PRK…
Organ Morphology	2.69E-04-1.5E-02	TP53,SOCS1,PDGFA,DNMT3A,CSDA,STAMBP,INPP5D,IGFBP2,CDH1,FGFR4,SATB1,CYP27B1,HTT,SMAD4,KIF5C,INSR,CTNNB1,JAK3,CALB1,DSC2,DSG2
Reproductive System Development and Function	2.69E-04-8.95E-03	CUGBP1,DDX25,DNMT3A,PDGFA,TYRO3,MLLT4,LIMK2,DAZL,SMARCA4,STYX,CCNA1,PCYT1B,FANCD2,TRIM27,PIWIL2,SMARCB1,CIT,KIT,FABP7,DSC2,HOOK1,MCL1,LIG3,TNFSF11,MAP7,CSDA,NR2C2,UGT8,BAX,TNFRSF11A,GSR,GPR64,CDH1,H2AFX,HTT,BRCA2,INSR,DSG2,PVRL2
Skeletal and Muscular Disorders	2.9E-04-2.3E-02	SERPINI1,VPRBP,DIAPH3,PCDH7,CDK9,TUBB4,AQP4,BIRC5,POLE,SCNN1A,SOX2,BCL7A,LCK,TOP1,CYFIP2 (includes EG:26999),CASP9,CRYM,STRN4,FGFR4,SMARCB1,LPL,CSNK2A1,FABP7,PKIA,CALB1,ITGB5,RASGRP2,PGK1,TP53,SLC1A6,SPP1,SLC25A1,CHGB,ICA1,TNNC2,AIG1,LRRN1,ZBTB44,SCNN1G,ZNF385B,ETV4,HTT,ANKRD11,C2ORF40,CYCS (includes EG:54205),IDO1,DTNA,CA11,MDK,SFRP1,GNAL,ETV5,NOS1,SFRP2,PDGFA,JPH3,SRD5A1,HDAC9 (includes EG:9734…
Cellular Assembly and Organization	3.28E-04-2.3E-02	RAB3IP,DBN1,CLN8,DIAPH3,CHAF1A,PAK1,TOP1,EPS8L1,EZR,HTR7,NEO1,AIF1,CALB1,TP53,ASF1B,SYT4,LCP1,PRKCQ,ITGA6,MTA2,AURKA,RAC3,SMARCA1,CDH1,STMN3,H2AFX,SYK,HTT,SYT1,SNCA,BUB3,PDGFA,SUV39H2,MARK2,ASF1A,IKZF1,CASD1,SMARCA4,TIMM50,CCDC88A,CIT,FGD4,OPA1,RERE,BPTF,ACTC1,VASP,NCKAP1,PPP1R9A,NAP1L4,RSF1,TNFSF11,PAK6,DST,MAPK8,PLK1,BAX,NCAPD2,INPP5D,TAF6L,MYH2,TLK1,VAV3,PLXNB1,BRCA2,SMARCC1,DDX11
Reproductive System Disease	3.68E-04-2.3E-02	MYH10,SOCS1,DDX25,CMTM4,TYRO3,RRM2B,TUBB4,OCLN,PAK1,LCK,FGFR1OP2,POMZP3,EZR,CSNK2A1,HS6ST3 (includes EG:266722),FABP7,PKIA,FAM124A,ITGB5,MATK,MCL1,TP53,SMAD2,LCP1,CAPN6,PRKCQ,ITGA6,AIG1,SPAST,CDH1,SYK,H2AFX,HTT,CHKA,CYCS (includes EG:54205),DTNA,GPM6A,SFRP1,STX3,EIF2S3,ANK3,PDE7A,SRD5A1,DUSP6,PNKP,ACVR2B,CXCL5,CD74,PROM1,PTPN5,AKAP7,SMARCA4,MPPED2 (includes EG:744),CDH3,INPP5B,TOP2A,PRDM14,PRKD2,…
Cell Death	3.87E-04-2.3E-02	ST6GAL1,RRM2B,NPTX1,C16ORF5,LCK,KIF1A,SMARCB1,TRAF4,EXOC2,MYB (includes EG:4602),DLG4,TNFRSF10C,AIF1,CALB1,ALDOC,TP53,SMAD2,PRKCQ,ITGA6,FUBP1,TCF3,KLF13,OTX2,CDH1,SYK,CYCS (includes EG:54205),GJC1,PPP5C,FANCA,PNKP,CD74,SMARCA4,CCT4,TRIM27,INPP5B,PRDM14,PHF17,PRKD2,LIG3,ATP7B,PRKDC,TNFSF11,UCP2,TPK1,HIP1,INPP5D,HPN,BUB1,CBS,BMP7,ID4,AKAP1,PRKACB,LIG1,JMY,CDCP1,RTN1,CBX5,CDK9,CASP9,CYFIP2 (includes…
Neurological Disease	3.87E-04-1.71E-02	MYH10,HLA-DOA,RRM2B,VAC14,CCDC88C,TUBB4,POLRMT,NPTX1,LCK,CRYM,KIF13A,KIF1A,TRAF4,EXOC2,DLG4,SAFB,CALB1,TP53,PRKCQ,SORL1,TNNC2,OSBPL10,VLDLR,NPY5R,KLF13,OTX2,ATP8A2,NRXN1,GSTCD,ZNF551,GIPC2,SYK,ST6GAL2,CYCS (includes EG:54205),ANK3,JPH3,TMEM132D,LIMD1,CD74,CTTNBP2,CGNL1,TRERF1,TRIM27,BRWD3,MAL2,RYR1 (includes EG:6261),RERE,FHDC1,PHF17,SNRNP40,MOBKL2B,PRKDC,MEGF10,HNRNPU,ATXN7L1,UCP2,CHGA,DST,NLGN4…
Cell-mediated Immune Response	5.31E-04-2.29E-02	LIG1,SOCS1,CHD4,CD74,SMARCA4,BIRC5,LCK,RORA,MYB (includes EG:4602),KIT,CTNNB1,LIG3,TP53,PRKDC,PRKCQ,FLT1,EGR1,EPHA1,MAPK8,BAX,TCF3,SYK,VAV3,KDR,SATB1,JAK3,TOX
Cellular Development	5.31E-04-1.63E-02	SOCS1,MYH10,HLA-DOA,DDX25,RRM2B,TYRO3,PAK1,LCK,CCNA1,EZR,HTR7,SMARCB1,MYB (includes EG:4602),SAFB,HOOK1,ITGB5,MATK,CR2,MCL1,TP53,PRKCQ,ITGA6,TCF3,CDH1,PATZ1,CCND2,CD72,H2AFX,SYK,HTT,TSPAN7,IKZF1,CD74,SMARCA4,YY1,TRIM27,LLGL1,FGD4,CTNNB1,LIG3,PRKDC,TNFSF11,CHGA,EGR1,MAP7,MAPK8,INPP5D,GPR64,EDIL3,CDC42SE2,BMP7,JAK3,TAF4B,CUGBP1,DNMT3A,LIMK2,PARD6A,STYX,BIRC5,SOX2,CASP9,PCYT1B,MAP2K2,RORA,PIWIL2,SOX…
Hematological System Development and Function	5.31E-04-2.29E-02	SOCS1,CHD4,BCR,IKZF1,CD74,SMARCA4,BIRC5,LCK,CCNA1,NFYA,MAP2K2,RORA,SMO,MYB (includes EG:4602),KIT,CTNNB1,CR2,TP53,TNFSF11,SPP1,PRKCQ,FLT1,EGR1,EPHA1,MAPK8,BAX,TCF3,INPP5D,VAV3,SYK,KDR,SATB1,JAK3,TOX,FANCA
Hematopoiesis	5.31E-04-1.48E-02	SOCS1,CHD4,BCR,IKZF1,CD74,SMARCA4,BIRC5,LCK,CCNA1,MAP2K2,NFYA,RORA,SMO,MYB (includes EG:4602),KIT,CTNNB1,CR2,TP53,TNFSF11,SPP1,PRKCQ,FLT1,EGR1,EPHA1,MAPK8,BAX,TCF3,INPP5D,VAV3,SYK,KDR,SATB1,JAK3,TOX,FANCA
Cell Morphology	6.9E-04-2.29E-02	MYH10,DBN1,SOCS1,TYRO3,MLLT4,AQP4,EEF1D,PAK1,EPS8L1,LCK,PEG10,EZR,HTR7,CSNK2A1,MYB (includes EG:4602),AIF1,ITGB5,MATK,TP53,SMAD2,ITGA6,TCF3,CDH1,CCND2,SYK,HTT,SFRP1,TRRAP,MCRS1,PBX2,TSPAN7,IKZF1,EIF4G1,SMARCA4,YY1,LLGL1,FGD4,CTNNB1,TNFSF11,PPM1E,CHGA,EGR1,MAPK8,MAP7,HIP1,SIN3A,HPN,EDIL3,MAZ,BMP7,CDC42SE2,RAB3IP,PRKACB,TAF4B,HYAL2,CDCP1,PARD6A,LMNB1,STYX,BIRC5,TOP1,CASP9,MAP2K2,FGFR4,LPL,PMAIP1,RA…
Gastrointestinal Disease	7.92E-04-2.3E-02	PRKACB,SOCS1,HNRNPH1,CUGBP1,RRM2B,CDK9,TUBB4,POLE,BIRC5,CHAF1A,PAK1,TOP1,LCK,MAP2K2,ITGB5,CDC25A,PGK1,TP53,NME4,SPP1,YWHAE,C20ORF27,WEE1,AURKA,CDH1,UBR5,ACY1,TEAD4,PDPN,SQLE,SFRP2,PA2G4,RAD9A,BCR,HDAC9 (includes EG:9734),CD74,MCM4,HSP90B1,TOP2A,PRDM14,KIT,SMAD4,CTNNB1,FLT1,MAPK8,PLK1,BAX,CDC2,PRKCI,C10ORF46,TLK1,KDR,NUP62,AKAP1,PRKCB
Organismal Development	9.4E-04-2.02E-02	MYH10,SOCS1,RRM2B,TYRO3,MLLT4,NPTX1,STYX,AKIRIN2,OCLN,BIRC5,SPRY4,SCNN1A,FGFR4,LSR,SMARCB1,MYB (includes EG:4602),AIF1,CALB1,MCL1,TP53,SMAD2,OVOL2,CLC,G2E3,ITPR2,PCSK5,FOXH1,TKT,HIRA,NR2C2,DLL3,XAB2,STAMBP,OTX2,NASP,BMPR1B,MDM4,CCND2,INTS1,HTT,SFRP1,INSR,HMGB3,BUB3,TEAD4,NSD1,TPM1,PBX2,SFRP2,SRD5A1,PDGFA,LIMD1,HDAC9 (includes EG:9734),IKZF1,SLC2A3,IGF2BP1,SMARCA4,YY1,SP1,CIT,SMO,KIT,SMAD4,CTNNB1,…
Dermatological Diseases and Conditions	1.03E-03-1.7E-02	LIG1,SOCS1,RRM2B,BCR,HDAC9 (includes EG:9734),TAOK1,CDK9,TUBB4,BIRC5,HSP90B1,LCK,TOP1,CASP9,MAP2K2,MTA1,TOP2A,SMO,SMAD4,KIT,PMAIP1,CTNNB1,ITGB5,MCL1,TP53,SILV,SLC1A6,SPP1,FLT1,ITGA6,MAPK8,PLK1,BAX,CDC2,CDH1,KDR,BRCA2,PRKCH,CLDN3
Respiratory Disease	1.03E-03-1.31E-02	LIG1,TNRC6B,RRM2B,XPO5,BCR,HDAC9 (includes EG:9734),TAOK1,TUBB4,CDK9,CBLC,SMARCA4,BIRC5,POLE,SCNN1A,LCK,TOP1,HSP90B1,CASP9,MAP2K2,FANCD2,TOP2A,KIT,CTNNB1,ITGB5,ALDOC,TP53,PAH,SPP1,EDNRB,YWHAE,EPB41L4B,FLT1,PGGT1B,MAPK8,PLK1,ERBB3,AURKA,CDC2,CDH1,SCNN1G,KDR,FOXA3,SMEK1,CLDN3,VHL,PRKCB
Cell-To-Cell Signaling and Interaction	1.17E-03-2.18E-02	PRKACB,KCND2,TAF4B,MLLT4,GRIA4,NPTX1,BIRC5,LCK,PAK1,GRIK5,STRN4,HTR7,DLG4,SAFB,RTN4R,RASGRP2,CR2,MYO6,TP53,SMAD2,SLC1A6,NOVA1,SPP1,ITGA6,NPY5R,NRXN1,CDH1,BMPR1B,CSPG5,SYK,HTT,RLN2,DTNA,PCDHB5,SYT1,INSR,SNCA,GJC1,VHL,DLGAP1,NLGN1,GRIN2D,PCDHB3,PTPRF,CDH3,KIT,CACNB2,CTNNB1,TNFSF11,EGR1,PMCH,VDAC3,INPP5D,KCNQ2,PRKAR2B,BMP7,SYN2
Cellular Function and Maintenance	1.17E-03-2.3E-02	SOCS1,MYH10,LMNB1,PARD6A,BIRC5,LCK,PAK1,ABCC1,KIF1A,CSNK2A1,SAFB,FABP7,CALB1,DSC2,CR2,TP53,MYO6,SMAD2,SYT4,MYH14,XAB2,STAMBP,CDH1,BMPR1B,HTT,SYT1,SNCA,TRRAP,BCR,RAD9A,CASD1,SMARCA4,SMAD4,KIT,CTNNB1,ACTC1,PRKDC,TNFSF11,SYNE2,EGR1,FLT1,DST,BAX,PRKAR2B,CBS,KDR,BRCA2,BMP7,JAK3,DSG2,PRKCB
Renal and Urological System Development and Function	1.37E-03-1.2E-02	HSP90B1,NFAT5,TJP1,FLT1,KDR,CSDA,BAX,HIP1,BIRC5
Embryonic Development	1.68E-03-2.3E-02	MYH10,ADAMTS8,AKIRIN2,SPRY4,BIRC5,SOX2,LSR,SMARCB1,MYB (includes EG:4602),MCL1,MATK,TP53,SMAD2,OVOL2,G2E3,PCSK5,FOXH1,HIRA,DLL3,XAB2,OTX2,CDH1,BMPR1B,NASP,INTS1,CCNF,HTT,USF1,FZD5,SFRP1,INSR,VHL,TEAD4,NSD1,TPM1,PBX2,SFRP2,PDGFA,IKZF1,ACVR2B,FOXD3,SLC2A3,SMARCA4,HSP90B1,YY1,SP1,SMO,SMAD4,CTNNB1,NCKAP1,TNFSF11,TJP1,FLT1,TAF8,CSDA,TCF7L1,GNAS,EDIL3,FOXO1,KDR,LMBR1,BRCA2,NR5A2,BMP7,SKIL,PNPLA6
Cellular Compromise	2.05E-03-1.7E-02	TP53,PRKCQ,PLK1,GDAP1,HIP1,PISD,BAX,SLC18A2,CDC2,HTT,BRCA2,OPA1,NUP62,CALB1,SNCA
Tissue Development	2.15E-03-2.3E-02	ADAMTS8,SFRP2,PDGFA,IKZF1,ACVR2B,HSP90B1,TRAF4,SMO,CALB1,CTNNB1,NCKAP1,MATK,SMAD2,TNFSF11,FOXH1,FLT1,DLL3,TCF7L1,GNAS,CDH1,EDIL3,FOXO1,CCNF,KDR,HTT,BMP7,FZD5,SFRP1,VHL
Cellular Movement	2.36E-03-2.3E-02	MYH10,ETV1,CBX5,MAP2K2,EZR,GRB7,CSNK2A1,NEDD4L,ITGB5,MATK,TP53,LCP1,SPP1,MYH14,STK38L (includes EG:23012),ITGA6,AURKA,TCF3,RAC3,IGFBP2,PIP5K1A,CDH1,SYK,ETV4,SFRP1,ST14,TRRAP,VHL,TPM1,SFRP2,UNC5A,MMP15,BCR,IGF2BP1,YY1,NFAT5,SP1,CDH3,MTA1,CIT,TOP2A,SMAD4,SH3GLB2 (includes EG:56904),CTNNB1,VASP,CCKBR,TNFSF11,CHGA,TJP1,DST,FLT1,MAPK8,PLK1,ERBB3,CDC2,HPN,PRKCI,VAV3,BMP7,CLDN3,PRKCB
Renal and Urological Disease	2.44E-03-2.3E-02	EDNRB,FLT1,RRM2B,HDAC9 (includes EG:9734),TUBB4,CDK9,CDC2,APRT,TOP1,CDH1,KDR,SMARCB1,TOP2A,KIT,HSD11B2,BMP7,MDK,CTNNB1,VHL
Protein Synthesis	2.48E-03-7.72E-03	TP53,KCND2,TNFSF11,LNX1,GCHFR,AASS,P2RX5,CCDC88C,BAX,GPHN,AQP4,BAG4,GPX3,CDH1,INSR,SYT1,IVD,CTNNB1,MED24,PPP5C,VHL
RNA Post-Transcriptional Modification	2.58E-03-2.21E-02	HNRNPH1,DDX25,CUGBP1,SYNCRIP,SFPQ,SFRS6,RBPMS,SNRPN,CPSF6,CSTF2T,HNRNPA0,SAFB,DCP2,GRSF1,SNRNP40,YTHDC1,IGF2BP3,BICD1,DDX54,NOVA1,PPIG,PNN,PAPOLG,SFRS2IP,PTBP1,HTT,PABPN1,SF3A2,PTBP2,SFRS8
Cellular Growth and Proliferation	2.68E-03-2.29E-02	SOCS1,DBN1,GTPBP1,AQP4,EEF1D,SPRY4,OCLN,PAK1,BOP1,CCNA1,PEG10,KIF13A,EZR,SMARCB1,MYB (includes EG:4602),CSNK2A1,PRUNE,SAFB,AIF1,MYBBP1A,ITGB5,MCL1,CR2,SART3,MATK,TP53,SMAD2,LCP1,CLC,CNOT6L,ITGA6,ZBED1,TCF3,OTX2,CDH1,ASGR1,CCND2,PATZ1,CD72,CCNF,SYK,CHKA,RLN2,CYP2B6,SFRP1,TRRAP,PPP5C,SNCA,FANCA,GRB14,UNC5A,CDT1,DUSP6,SEMA6A,IKZF1,SYMPK,EIF4G1,SMARCA4,YY1,HK2,PTPRJ,HNRNPA0,PRDM14,EPS15L1,CTNNB1,CCKB…
Hematological Disease	2.68E-03-2.3E-02	NSD1,TYRO3,RRM2B,MLLT4,HDAC9 (includes EG:9734),BCR,IKZF1,CD74,POLE,BIRC5,TOP1,PAK1,LCK,CASP9,ABCC1,TOP2A,MYB (includes EG:4602),SMAD4,KIT,CTNNB1,ITGB5,RASGRP2,TP53,PRKDC,SPP1,EGR1,FLT1,PGGT1B,ITGA6,MAPK8,MLF1,BAX,KLF13,TCF3,GNAS,CDH1,SYK,KDR,SATB1,CHKA,RLN2,SMARCC1,VHL,PRKCB
Amino Acid Metabolism	4.18E-03-2.3E-02	PRKACB,NOS1,PDGFA,MARK2,TYRO3,BCR,LIMK2,TAOK1,ACVR2B,CDK9,CBLC,CSNK1E,TRIB1,PAK1,LCK,MAP2K2,CSNK2A1,KIT,GATM,MATK,PRKCQ,FLT1,SLC6A6,STK38L (includes EG:23012),MAPK8,ERBB3,MKNK2,AURKA,CDC2,EIF2AK4,BMPR1B,PRKAR2B,PRKCI,TLK1,SBK1,SYK,HTT,IDO1,PRKCH,INSR,JAK3,IVD,PRKCB,MCCC2
Drug Metabolism	4.18E-03-2.3E-02	SYT4,ABCC1,TOP2A,SYT1
Hair and Skin Development and Function	4.18E-03-2.3E-02	SOCS1,CDH1,CDH3,SMAD4
Immunological Disease	4.18E-03-1.65E-02	ST6GAL1,HLA-DOA,GTPBP1,CCDC88C,TUBB4,LCK,KIF13A,FRAS1,SMARCB1,MYB (includes EG:4602),SAFB,TNFRSF10C,AIF1,CLN6,TP53,LCP1,PRKCQ,SORL1,RUNDC3B,OSBPL10,KLF13,ATP8A2,NRXN1,CDH1,SYK,TRRAP,DLGAP1,ANK3,SCG3,TMEM132D,CD74,LOC342892,MPPED2 (includes EG:744),PTPRJ,TRIM27,PHF17,MOBKL2B,PRKDC,TNFSF11,UCP2,UTP20,TJP1,SLC6A6,HIP1,INO80D,INPP5D,HS3ST4 (includes EG:9951),PDZD2,MAGI1,EDIL3,KLHL14,TLK1,CHMP4C,C12OR…
Lymphoid Tissue Structure and Development	4.18E-03-2.29E-02	FLT1,KDR,BAX,JAK3,CR2
Molecular Transport	4.18E-03-2.3E-02	TPR,VAC14,PIP5K1B,SCNN1A,CEL,CASP9,LSR,INPP5B,LPL,SMO,DNAJA2,RPAIN,SYT4,UCP2,PRKCQ,SLC6A6,IPO7,BAX,VLDLR,NUTF2,INPP5D,DGKZ,PIP5K1A,CBS,SLC16A1,HTT,SYT1,INSR,PRICKLE1,SNCA
Organismal Injury and Abnormalities	4.18E-03-4.18E-03	TP53,MTA1
Protein Trafficking	4.18E-03-5.64E-03	PRKCQ,LSR,HTT,TPR,LPL,SMO,IPO7,DNAJA2,PRICKLE1,NUTF2,RPAIN
Skeletal and Muscular System Development and Function	4.18E-03-1.93E-02	NOS1,TNFSF11,SPP1,PDGFA,FLT1,LIMD1,TNFRSF11A,INPP5D,GNAS,NLK,MYH2,CCND2,KDR,CYP27B1,TRAF4,PLXNB1,MYB (includes EG:4602),CALB1,DSC2,JAK3,DSG2,ACTC1
Small Molecule Biochemistry	4.18E-03-2.3E-02	PRKACB,CHST4,DDX25,TYRO3,VAC14,LIMK2,PIP5K1B,CBLC,CDK9,PLA2G7,SCNN1A,CEL,LCK,PAK1,CASP9,MAP2K2,LSR,ABCC1,SMARCB1,LPL,CSNK2A1,MATK,SYT4,ACAP1,PRKCQ,CPT1A,TKT,STK38L (includes EG:23012),AURKA,VLDLR,EIF2AK4,BMPR1B,SORD,PIP5K1A,SYK,HTT,SLC37A4,USF1,IDO1,PRKCH,INSR,SYT1,SNCA,MCCC2,NOS1,CHST6,GRPR,PDGFA,MARK2,BCR,ACVR2B,TAOK1,SMARCA4,CSNK1E,TRIB1,HK2,INPP5B,TOP2A,KIT,RENBP,GATM,CCKBR,ATP7B,SLC25A13,NPY…
Tissue Morphology	4.18E-03-2.2E-02	NOS1,MYH10,MARK2,LIMD1,BCR,MLLT4,IKZF1,ACVR2B,BIRC5,NLK,CIT,LPL,SMO,MYB (includes EG:4602),CALB1,TP53,TNFSF11,SPP1,EDNRB,NPY1R,TKT,FLT1,HIRA,PMCH,BAX,TCF3,TNFRSF11A,NPY5R,INPP5D,OTX2,GRB10,GNAS,PRKCI,CBS,FOXO1,CYP27B1,HTT,KDR,RLN2,INSR,JAK3,FANCA
Tumor Morphology	4.18E-03-2.3E-02	TP53,HSPA4,HYOU1,PLK1,NR2F6,BAX,CTNNB1,BIRC5
Carbohydrate Metabolism	4.65E-03-2.29E-02	CHST6,HYAL2,CHST4,GRPR,GMDS,VAC14,GYG2,PIP5K1B,PLA2G7,HK2,PCYT1B,LPL,SMARCB1,RENBP,CLN6,CCKBR,PGK1,ACAP1,SLC25A13,CPT1A,KHK,NPY1R,TKT,MAPK8,PMCH,ETNK1,CHST8,SORD,PIP5K1A,PRKAR2B,PYGM,ST6GAL2,SLC37A4,HTT,USF1,CHKA,FBP1,FUT9,INSR,PNPLA6
Lipid Metabolism	4.65E-03-2.3E-02	VAC14,BAX,PIP5K1B,VLDLR,PLA2G7,INPP5D,SCNN1A,CEL,DGKZ,PIP5K1A,CASP9,CBS,INPP5B,LSR,HTT,LPL,NR5A2,INSR,SNCA,PNPLA6
Connective Tissue Disorders	6.06E-03-1.18E-02	TP53,SOCS1,RRM2B,TYRO3,TPR,BCR,ERBB3,AURKA,GRB10,SCNN1A,GNAS,MDM4,LCK,CCND2,SCNN1G,SMARCB1,USF1,SAFB,SKIL,TRRAP,MCRS1
Cardiovascular System Development and Function	6.42E-03-2.3E-02	TP53,SPP1,EDNRB,PDGFA,FLT1,SMARCA4,PTPRJ,KDR,SMO,FZD5,INSR,GJC1,PNPLA6,VHL
Visual System Development and Function	7.66E-03-7.66E-03	TP53,PDGFA,FLT1,KDR,INSR
Antimicrobial Response	7.74E-03-7.74E-03	TP53,HESX1,SMARCA4
Post-Translational Modification	7.74E-03-2.3E-02	PRKACB,NOS1,PDGFA,MARK2,TYRO3,BCR,LIMK2,ACVR2B,TAOK1,CBLC,CDK9,CSNK1E,TRIB1,PAK1,LCK,MAP2K2,CSNK2A1,KIT,GATM,MATK,PRKCQ,FLT1,MAPK8,STK38L (includes EG:23012),ERBB3,MKNK2,AURKA,CDC2,EIF2AK4,BMPR1B,PRKAR2B,PRKCI,TLK1,SBK1,SYK,IDO1,PRKCH,INSR,JAK3,PRKCB
Connective Tissue Development and Function	8.61E-03-2.15E-02	NOS1,PA2G4,TSPAN7,PDGFA,LIMD1,YY1,NLK,FANCD2,LPAR2,TRAF4,HTR7,FGD4,AIF1,CTNNB1,PMAIP1,TP53,TNFSF11,SPP1,FLT1,ITGA6,MAPK8,BAX,TNFRSF11A,INPP5D,SIN3A,GNAS,MDM4,CCND2,VAV3,CCNF,CYP27B1,RLN2,BRCA2,CDC42SE1,CDC42SE2,SKIL,INSR,TNIK,FANCA
Developmental Disorder	1.17E-02-2.3E-02	TP53,SOX2,FANCD2,BCOR,FRAS1,VHL,OTX2,BIRC5
Ophthalmic Disease	1.17E-02-2.3E-02	SOX2,TP53,CASP9,FANCD2,BCOR,FRAS1,OTX2
Auditory and Vestibular System Development and Function	1.2E-02-1.2E-02	HMX2,OTX2
Endocrine System Development and Function	1.2E-02-1.2E-02	CYP27B1,INSR,CTNNB1,CALB1
Hepatic System Disease	1.2E-02-2.3E-02	TP53,ATP7B,PEG10,HPN
Respiratory System Development and Function	1.2E-02-1.2E-02	PCSK5,TRAF4
Organismal Functions	1.39E-02-1.39E-02	NOS1,SPP1,HOMER2,NPY1R,PMCH,SLC18A2,FOXO1,BCHE,HTT,ADCY1,DLG4,PNPLA6,SNCA,GNAL,CCKBR
Hepatic System Development and Function	1.69E-02-1.69E-02	TP53,CBS,CIT
Energy Production	2.04E-02-2.04E-02	ATP7B,DDX25,ABCC1,TOP2A,SMARCA4,CDC2
Nucleic Acid Metabolism	2.04E-02-2.04E-02	ATP7B,DDX25,ABCC1,TOP2A,SMARCA4,CDC2
Behavior	2.29E-02-2.3E-02	LPAR2,NPY1R,HTT,RLN2,GNAL
Digestive System Development and Function	2.29E-02-2.29E-02	LPAR2,RLN2,GNAL
Humoral Immune Response	2.29E-02-2.29E-02	LIG1,PRKDC,LIG3
Infection Mechanism	2.3E-02-2.3E-02	TP53,PAK1,BANF1,NR2C2
Nutritional Disease	2.3E-02-2.3E-02	TP53,ATP7B
Vitamin and Mineral Metabolism	2.3E-02-2.3E-02	CEL,LPL

## Sheet: S2-D
Table S2-D. Functional Analysis of the downregulated genes in iPS-hKT and hKT
Category	P-value	Molecules
Gene Expression	3.44E-15-3.13E-03	AXIN1,MAP3K7IP2,TLE1,POLRMT,GNB1,LCK,FPGS,PQBP1,TSC2,WWOX,SAFB,PPM1A,GNA13,DMAP1,ZNF45,NSBP1,AMHR2,SART3,ETS1,CRKL,RANBP3,NFKB2,TCF3,OTX2,DAXX,FOXN3,TCEA2,TRRAP,PPP5C,HNRNPAB,KLF15,ECSIT,ILK,RBBP7,SMARCA4,BAZ2A,ARRB1,NCOR1,GTF3C1,TNFSF11,ZNF398,UCP2,KHDRBS1,TAL1,KAT5,ID3,AFF3,CSF1,ENO1,MAZ,LYN,NR4A1,RAPGEF1,SOCS3,YWHAH,SMAD3,RGL3,ZFPM1 (includes EG:161882),ETV1,SP7,CBX5,PYY,GATA2,SOX2,CHD2,JUND,E…
Cell Death	3.36E-13-4.23E-03	AKAP8L,ST6GAL1,AXIN1,MAP3K7IP2,FANCF,GSK3A,LIMS1,POR,GNB1,GIMAP5,LCK,GDF5,FPGS,PQBP1,WWOX,TRAF4,TSC2,VAMP3,PPM1A,GNA13,CLNS1A,ETS1,PTGIS,AKT2,LAIR1,NFKB2,TCF3,CACNA1A,OTX2,DAXX,PPP5C,GJC1,EPHX1,UBE2C,USP18,IL1RL1,BAT3,ILK,FIP1L1,FNTA,SMARCA4,IQGAP2,ARRB1,CLDN4,BRD4,PRKD2,IL27RA,CD27,TNFSF11,EP400,UCP2,AGAP2,KHDRBS1,TAL1,KAT5,ID3,BAK1,MAD2L1,CBS,MSH2,ENO1,CSF1,NR4A1,LYN,RAPGEF1,LIG1,SOCS3,MPRIP,ER…
Cell Cycle	1.44E-11-4.3E-03	MAGED1,GLI2,NOLC1,KRAS,SPDEF,CCND1,TBRG1 (includes EG:84897),RB1,LCK,MADD,GAL,MAD2L2,GORASP2,NEK6,WWOX,TSC2,PPM1A,GNA13,HIPK2,TYMS,TP53,ESPL1,PRKCQ,CDCA8,LAIR1,NPAT,HMGA1,FGFR2,STAT3,PTOV1,TCF3,RAD1,DCTN2,SKP2,HSPA8,DAXX,CDH1,RUNX1T1,HELLS,CCNF,FOXN3,BTG2,ANAPC5,PPP5C,TRRAP,XRCC5,UBE2C,KIF20A,APOE,CD320,RAB35,ILK,PRPF4,SMARCA4,ARRB1,CARD10,MOV10L1,BRD4,RPS6KA2,KIF2C,CDC5L,RAD21,PLA2G16,EP400,KHDR…
Cancer	9.28E-11-4.23E-03	ST6GAL1,AKAP8L,LIMS1,GNB1,POR,GIMAP5,GORASP2,WWOX,TSC2,EXOC5,GNA13,FGF19 (includes EG:9965),ETS1,CRKL,GPRIN1,NFKB2,MYL9 (includes EG:10398),HTR3A,DOK1,TRRAP,CDK10,C9ORF86,ARRB1,CLDN4,BEX4,AGAP2,ID3,MAD2L1,PEX5,CBS,ENO1,FBXO2,NR4A1,RAPGEF1,HYAL2,SMAD3,ETV1,CBX5,DAK,LIMK1,TUBA1C,JUND,TEK,RASGRP2,EGR4,CDKN2D,CDK3,MAPK12,HAS3,BCL2L1,CALB2,PSME4,ETV5,NOS1,SUMO3,TPM1,TFEB,RAB23,PTCRA,PHKA2,COL6A1,YBX1,…
Genetic Disorder	5.96E-10-3.21E-03	F12,HLA-DOA,MAGED1,CCNB2,KRAS,CCND1,ATP2A2,POR,RB1,LCK,GAL,MVK,WWOX,NEK6,HIPK2,CYSLTR2,TMEM97,TARBP2,ALDOC,TYMS,TP53,PTGIS,ALDH1B1,AKT2,CDCA8,FGFR2,STAT3,TCF3,GLRX3,RAD1,GART,HSPA8,CDH1,RUNX1T1,FSCN1,UBE2C,APOE,GNA11,CD74,FNTA,CDK10,GINS2,C9ORF86,CLDN4,HSP90AB1,CD27,CASP8,TUBB2C,MAPRE1,PTGS1,MCM3,MAD2L1,LACTB2,PEX5,CD80,NTRK3,ENO1,EIF4A1,LYN,SLC6A4,BMP7,NLE1,ARHGDIA,MAP3K3,PSEN1,LIG1,TRAPPC2L,KLF…
Respiratory Disease	5.96E-10-1.29E-03	MAGED1,FTL,AXIN1,TRAP1,CCNB2,KRAS,POR,RB1,LCK,GAL,RARA,NEK6,WWOX,HIPK2,CHRNA3,DNMT1,TARBP2,MCL1,ALDOC,PTGIS,KCNJ12,TP53,TYMS,ALDH1B1,AKT2,CDCA8,HSF1,HMGA1,FGFR2,ACHE,STAT3,CHRNA10,GART,SKP2,CHRNG,CDH1,CCND3,E2F1,TTF1,ALDOA,UBE2C,EPO,CACNA2D2,GPX1,TPI1,FNTB,FNTA,CDK10,SMARCA4,CLDN4,HSP90AB1,TUBA8,BBC3,RARB,IGF1R,TOP2A,PRKCE,RASSF5,RXRB,CASP8,CTNNB1,SERBP1,AIFM1,TUBB2C,EPB41L4B,PTGS1,CDC6,PLK1,KAT5…
Dermatological Diseases and Conditions	6.89E-10-4.86E-04	HNRNPH1,UBE2H (includes EG:7328),GLI2,TMEM132A,FAM59A,CCND1,PTCH2,POR,SNRPA,LCK,GATAD2A,FPGS,NEK6,DAZAP2 (includes EG:9802),HIPK2,DNM2,TP53,TYMS,STAT3,RAP1A,CDH1,BTG2,HTR3A,ZYX,UBE2C,ERI3,RNF10,CCBP2,ILK,FNTA,CDK10,NECAB3,CLDN4,HSP90AB1,TRIM29,CD27,TNPO3,RAD21,RBM17,KHDRBS1,TUBB2C,SLC35A2,MPP2,KPNB1,RNF216,FOS,CD80,LYN,AFG3L2,MAP3K3,PSEN1,LIG1,SF3B2,NLRP1,CDK9,RARG,LIMK1,PER3,HDAC6,MAP2K2,HDAC11,…
Infectious Disease	6.89E-10-6.38E-05	F12,ST6GAL1,HNRNPH1,HLA-DOA,GABRA5,TWF1,UBE2H (includes EG:7328),RAB2A,CA5B,NUP133,CTSG,TMEM132A,FAM59A,STXBP2,POR,SNRPA,LCK,GATAD2A,FPGS,VAMP3,ARPC1A,DAZAP2 (includes EG:9802),CYSLTR2,DNM2,CASQ2,TYMS,CLNS1A,MAP3K9,ACACB,NDUFS7,CNR1,ACAN,SEMA5A,GYPC,NFKB2,STAT3,NRBP1,CA7,NCR1,BTG2,HTR3A,NDUFB7,ZYX,CYCS (includes EG:54205),XRCC5,HS3ST5,UBE2C,ERI3,APOE,RNF10,ICAM1,RAB28,BAT3,ZBED5,GAPDH (includes E…
Cell Morphology	7.78E-10-3.36E-03	AXIN1,MLLT4,LIMS1,LCK,BCAN,TSC2,EXOC5,GNA13,ETS1,AKT2,CRKL,FERMT2,GPRIN1,SEC13,NFKB2,TCF3,CNTN2,WASF2,ELMO2,TRRAP,HNRNPAB,GNA11,ILK,RBBP7,FIP1L1,SMARCA4,LLGL1,BRD4,IL27RA,CD27,TNFSF11,UCP2,BAK1,MARCKSL1,MAD2L1,EDIL3,CSF1,MAZ,LYN,NR4A1,RAPGEF1,RYK,HYAL2,MPRIP,ERAF,LIMK1,FGFR4,JUND,GPX4,E2F2,TEK,RASGRP2,EWSR1,RDX,MAPK12,SMPD2,HAS3,IGFBP2,ADRA2A,BCL2L1,CNPY2,PEBP1,LOX,TPM1,TFEB,RND1,PIK3R5,RAD9A,INP…
Embryonic Development	8.56E-10-2.5E-03	HNRNPH1,ATP6V0C,UBE2H (includes EG:7328),F2R,UBE2L3,FAM59A,TMEM132A,CHAF1A,RB1,MPDZ,SNRPA,GATAD2A,FPGS,KARS,DAZAP2 (includes EG:9802),DNM2,TP53,FOXH1,MT1X,PRDM10,FGFR2,L1CAM,SPG7,AKAP13,BTG2,MYO1F,ZYX,FXR1,DVL2 (includes EG:1856),SFRP1,TRRAP,UBE2C,ECSIT,ERI3,RNF10,GFRA3,PRPF8,CTNNA1,POLR2J,NUP214,PFKL,NEUROD4,KSR1,ID1,NECAB3,TCOF1,REPIN1,CTNNB1,TRIM29,TNPO3,RPL18,RAD21,MYCN,RBM17,TNFSF11,KHDRBS1,…
Renal and Urological Disease	9.21E-10-2.9E-03	HNRNPH1,ATP6V0C,UBE2H (includes EG:7328),UBE2L3,FAM59A,TMEM132A,KRAS,CHAF1A,POR,MPDZ,RB1,SNRPA,GATAD2A,RARA,FPGS,TSC2,KARS,DAZAP2 (includes EG:9802),CHRNA3,DNM2,TP53,TYMS,MT1X,PRDM10,FGFR2,SPG7,CHRNA10,CHRNG,AKAP13,TIMP4,CDH1,BTG2,MYO1F,ZYX,FXR1,CTDSPL,FH,UBE2C,ERI3,RNF10,PRPF8,POLR2J,NUP214,PFKL,FNTA,FNTB,CDK10,NECAB3,RASAL1,HSP90AB1,CLDN4,TUBA8,RARB,REPIN1,TOP2A,CTNNB1,TRIM29,RPL18,TNPO3,RAD21,…
Cellular Compromise	2.47E-09-3.55E-03	HNRNPH1,HLA-DOA,TWF1,UBE2H (includes EG:7328),RAB2A,NUP133,FAM59A,TMEM132A,SNRPA,GATAD2A,FPGS,ARPC1A,DAZAP2 (includes EG:9802),DNM2,TP53,CLNS1A,MAP3K9,AKT2,ACACB,NDUFS7,NRBP1,BTG2,NDUFB7,CYCS (includes EG:54205),ZYX,HS3ST5,UBE2C,ERI3,RNF10,RAB28,BAT3,ZBED5,GPSN2,FNTA,MUC5B,ALKBH8,GPR182,NECAB3,CRIPAK,PRDM14,RBM19,TRIM29,TNPO3,FBXO21,RAD21,RBM17,TNFSF11,HNRNPU,AGAP2,KHDRBS1,MED20,ZNF12,SLC35A2,LZT…
Cellular Growth and Proliferation	1.69E-08-3.73E-03	ST6GAL1,DUSP8,GNB1,POR,TSC2,PPM1A,FGF19 (includes EG:9965),SART3,ETS1,EGLN2,NFKB2,MYL9 (includes EG:10398),DOK1,TRRAP,HNRNPAB,ECSIT,CDK10,CLDN4,MOV10L1,HNRNPA0,ID3,MARCKSL1,MAD2L1,ENO1,FBXO2,NR4A1,RAPGEF1,SMAD3,RGL3,SLC7A4,LIMK1,PLCD3,HS6ST1,WTAP,JUND,CD84,TEK,RASGRP2,EGR4,CDKN2D,CDK3,MAPK12,HAS3,BCL2L1,NOS1,SUMO3,TPM1,PTCRA,COL6A1,YBX1,NFS1,CD24,TACC3,KLK4,PPM1G,ING1,HSF4,PEMT,AGPS,SKAP1,HIPK1,D…
Hematological Disease	4.24E-08-2.33E-03	F12,KRAS,CCND1,POR,RB1,SRPK2,LCK,MVK,FBLN1,TSC2,ETS1,TP53,AKT2,PRKCQ,NPAT,CNR1,GYPC,FGFR2,RANBP3,NFKB2,STAT3,TCF3,KLF13,RUNX1T1,HTR3A,PIK3CD,DOK1,HNRNPAB,APOE,ICAM1,ADAMTS13,IL1RL1,GAPDH (includes EG:2597),KCNQ1,CD74,FNTA,CDK10,KSR1,TGM2,HSP90AB1,CTBP2,TMPRSS6,PIK3R2,CD27,CASP8,AVPR1B,PRKDC,TNFSF11,TUBB2C,CHGA,CUL7 (includes EG:9820),PTGS1,TAL1,CNTFR,ID3,BAK1,FOS,CBS,MSH2,ENO1,NTRK3,LYN,NR4A1,SLC…
Cellular Assembly and Organization	5.51E-08-4.37E-03	EVL,GPR6,NUP133,LIMS1,KRAS,NPTX1,STXBP2,CABIN1,GNB1,RB1,GAL,BCAN,TSC2,EXOC5,ARPC1A,GNA13,TP53,SCAMP1,ATG5 (includes EG:9474),PRKCQ,ACAN,SEMA5A,CNR1,GPRIN1,STAT3,CACNA1A,CNTN2,ARHGDIB,SYT13,HELLS,MIB1,FSCN1,WASF2,ELMO2,GJC1,KIF20A,APOE,FHL1,AP2A1,ICAM1,SPTBN4,GNA11,SOCS2,RBBP7,PRKG1,SMARCA4,KLHL20,KSR1,TGM2,ARF6,LLGL1,ARFGAP1,TAOK2 (includes EG:9344),KIF2C,MECP2,AP1M2,TUBGCP6,GRB2,DISC1,GNA12,MAPR…
Neurological Disease	5.93E-08-4.23E-03	MAGED1,GLI2,AXIN1,XDH,TMEM132A,KRAS,GSK3A,NPTX1,PTCH2,RB1,GAD2,LCK,GDF5,MADD,GAL,CYBA,NEK6,GNA13,HIPK2,TP53,TYMS,ATG5 (includes EG:9474),AKT2,CNR1,HSF1,STAT3,CACNA1A,GART,HSPA8,DAXX,HTR3A,BTG2,CYCS (includes EG:54205),AATK,SQSTM1,DEAF1,XRCC5,PRDX2,UBE2C,APOE,IL1RL1,GFRA3,GAPDH (includes EG:2597),BECN1,FNTA,CDK10,KSR1,TGM2,HSP90AB1,BBC3,CASP8,UCP2,AGAP2,MECP2,TUBB2C,GNA12,CNTFR,PTGS1,HIP1,BAK1,FOS…
Hematological System Development and Function	2.97E-07-3.95E-03	F12,HLA-DOA,CTSG,KRAS,CCND1,RB1,LCK,TSC2,GNA13,HS1BP3,ETS1,TP53,AKT2,PRKCQ,LAIR1,ADD2,HMGA1,STAT3,NFKB2,TCF3,RUNX1T1,HELLS,BTG2,PIK3CD,WASF2,XRCC5,HS3ST5,PRDX2,APOE,ICAM1,IL1RL1,P2RX1,CD74,HRH3,SMARCA4,TMPRSS6,IL27RA,CASP8,CD27,RNF112,PRKDC,TNFSF11,GRB2,GNA12,TAL1,ID3,FOS,CD80,MSH2,CSF1,LYN,PSEN1,SOCS3,JAK1,BAD,ERAF,PDPK1,ZFPM1 (includes EG:161882),GATA2,RARG,B4GALNT1,MAP2K2,MYBL2,IL23A,TEK,KLF11…
Hematopoiesis	2.97E-07-3.95E-03	MZF1,SOCS1,HLA-DOA,KRAS,CCND1,POLM,RB1,LCK,HBB (includes EG:3043),RARA,TSC2,TAPBP,HS1BP3,MCL1,ATM,TP53,ETS1,STAT5A,AKT2,CD19,PRKCQ,ADD2,LAIR1,HMGA1,ACHE,RPA1,NFKB2,STAT3,CSF3,TCF3,RUNX1T1,CCND3,PATZ1,BSG,HELLS,HTT,E2F1,PIK3CD,XRCC5,PRDX2,EPO,TCF4,ICAM1,IL1RL1,IKZF1,IGHG1,CD74,HRH3,SMARCA4,ID1,YY1,PRKX,MYST1,RARB,IGF1R,LAMP1,SLC19A1,IL27RA,CD27,CASP8,CTNNB1,RNF112,IL11RA,MYCN,PRKDC,TNFSF11,GRB2,EG…
Connective Tissue Disorders	4.25E-07-3.73E-05	AXIN1,KRAS,CCND1,RB1,LCK,TSC2,WWOX,GNA13,ETS1,TP53,ATG5 (includes EG:9474),AKT2,HSF1,HMGA1,NFKB2,STAT3,RAP1A,SKP2,DAXX,PLEKHG2,CDH1,BTG2,CYCS (includes EG:54205),PIK3CD,TRRAP,EPHX1,CYP2C9,USF2,ILK,BECN1,FNTA,KSR1,TGM2,BBC3,CTBP2,CASP8,CD27,PRKDC,MAPKAP1,EP400,GRB2,GNA12,CUL7 (includes EG:9820),LZTS2,BAK1,SERPINB4,PES1,FOS,MSH2,CD80,ENO1,NTRK3,CSF1,NR4A1,LYN,TPP1,UBTF,MAP3K3,RAPGEF1,PSEN1,ZNF384,B…
DNA Replication, Recombination, and Repair	7.92E-07-3.1E-03	AKAP8L,GLI2,CTSG,CCND1,TBRG1 (includes EG:84897),RB1,GATAD2A,MAD2L2,TSC2,RUVBL2,DMAP1,HIPK2,TP53,TYMS,HMGA1,RAD1,SKP2,CDH1,ERCC8,HELLS,BTG2,CYCS (includes EG:54205),NEIL1,MBD1,PIK3CD,TRRAP,XRCC5,APOE,ERCC4,PRPF4,CDK10,KSR1,BAZ2A,ARRB1,BBC3,KIF2C,CASP8,CDC5L,TNPO3,RAD21,LIG3,PRKDC,TNFSF11,AGAP2,MECP2,GRB2,DHX36,POLG,DEDD,INHBC,XIST,KAT5,SLC29A1,ID3,BAK1,KPNB1,MCM3,MAD2L1,FOS,IGHMBP2,LDLR,MSH2,NTRK…
Inflammatory Disease	3.13E-06-3.13E-06	SIGIRR,USP11,IGHG1,CDK9,TCF7,IKBKB,SIPA1,IGHM,CD27,IL23A,MC2R,IL11RA,IGHD,TP53,PPFIA1,MCM5,RUNX3,PHB2,STAT3,UBE2G2,GNAI2,CCND3,CD80,FOXO1,LYN,NUP62,CDK2AP2,MAP3K3,MAP2K5,PRKCB
Skeletal and Muscular Disorders	3.13E-06-4E-03	PLD2,AXIN1,TNNT2,CTSG,LIMS1,GSK3A,RB1,LCK,RARA,WWOX,TRAF4,HADHA,MC2R,MCL1,TYMS,TP53,ETS1,FGFR2,STAT3,CSF3,GART,UBE2G2,ZNF423,CDH1,CCND3,HTR3A,E2F1,PSMB1,ALDOA,ZYX,CDK2AP2,EPO,SIGIRR,BAT3,DUSP6,GPX1,HSPB8,IGHG1,FNTA,FNTB,CDK10,RARB,TOP2A,LAMP1,IGF1R,CASP8,CD27,IL11RA,PPFIA1,PPIF,PRIM2,GNAQ,POLD1,RRM1 (includes EG:6240),FOS,CD80,LYN,BMP7,MAP3K3,PRKCB,SOCS3,MAPK1,TP73,PDPK1,CDK9,BCL6,RARG,TCF7,POLE,…
Gastrointestinal Disease	3.54E-06-2.57E-03	HNRNPH1,ST6GAL1,F12,HLA-DOA,GLI2,AXIN1,CCNB2,LIMS1,KRAS,CCND1,ATP2A2,POR,MAML1,RB1,LCK,NR1I2,MVK,WWOX,NEK6,HIPK2,CYSLTR2,TMEM97,TYMS,TP53,ETS1,AKT2,CDCA8,PPP1R1B,CNR1,HSF1,HMGA1,FGFR2,GLRX3,PIGR,GART,RAD1,HSPA8,DAXX,CDH1,FSCN1,HTR3A,NUP43,CYCS (includes EG:54205),XRCC5,UBE2C,KIF20A,APOE,ICAM1,GNA11,CD74,BECN1,FNTA,CDK10,TGM2,GINS2,IQGAP2,C9ORF86,HSP90AB1,CLDN4,BBC3,BEX4,CTBP2,PRDM14,PRKD2,CASP8,R…
Molecular Transport	4.02E-06-3.15E-03	ERGIC1,ASPSCR1,YWHAH,RAB2A,NOLC1,XPO5,KRAS,PIP5K1B,AP2A2,RFFL,ROCK2,ZW10,CASP9,PEX16,RHOB,FRAS1,TSC2,DNAJA2,ARFIP1,NAPA,PRKCQ,CFL1,TIMM44,AP3S2,SEC23IP,CNR1,XPO7,LMAN1,NRBP1,PIP5K1A,ARF5,PTPN11,ARF3,RHOA,HTT,TRPC4AP,TMX1,EIF5A,KLC2,KDELR1,XPO6,AP2A1,RAB4A,MAPT,MCM3AP,DNAJA4,NUP214,KCNIP3,CD74,CHRM3,BCL2,RANGAP1,USO1,IPO9,ARF6,F2RL1,CDK5,GLI3,PEX10,ARFGAP1,VCP,SMO,GOSR1,RAB15,HGS,GRIN1,AP2M1,AP4M1…
Protein Trafficking	4.02E-06-2.88E-03	ERGIC1,ASPSCR1,YWHAH,RAB2A,NOLC1,XPO5,KRAS,HOMER3,AP2A2,RFFL,ZW10,CASP9,PEX16,PEX19,RHOB,FRAS1,TSC2,DNAJA2,NAPA,ARFIP1,CDC37,PRKCQ,YWHAE,TIMM44,CFL1,YWHAB,SEC23IP,AP3S2,XPO7,YWHAZ,LMAN1,NRBP1,PIP5K1A,TOMM22,ARF5,PTPN11,SYNJ2BP,ARF3,TMX1,TRPC4AP,HTT,TOMM34,EIF5A,KLC2,KDELR1,XPO6,AP2A1,RAB4A,MCM3AP,MAPT,DNAJA4,NUP214,KCNIP3,CD74,GPHN,TIMM17B,RANGAP1,USO1,ARF6,IPO9,GLI3,CDK5,PEX10,ARFGAP1,VCP,SMO,GO…
Connective Tissue Development and Function	7.1E-06-2.88E-03	SOCS1,AXIN1,PLK3,TYRO3,KRAS,CCND1,RB1,RARA,TSC2,FBLN1,LEPRE1,PSMD10,CSNK2A1,SAFB,GNA13,ATM,TP53,ESPL1,TFDP1,TPD52,STAT3,TCF3,SKP2,CDH1,GAB1,HELLS,MBD4,E2F1,UBE2C,PTPN12,ID1,STARD13,IGF1R,PRKCE,HGS,MYCN,KHDRBS1,ID3,RRM1 (includes EG:6240),MCF2L,FOS,KRT8,NTRK3,CSF1,RAPGEF1,CD247,SFRS2,BAD,TP73,MYH11,MEN1,PTK2,STARD10,RHOB,KRT18,MYBL2,JUND,TFE3,BRCA1,E2F2,CDC25A,E2F4,ATF3,EWSR1,STK11,CDK3,RASD1,PDGF…
Cellular Development	1.04E-05-3.55E-03	AXIN1,LIMS1,LCK,GDF5,TSC2,WWOX,EXOC5,SAFB,GNA13,AMHR2,FGF19 (includes EG:9965),ETS1,AKT2,LAIR1,ACAN,CRKL,NFKB2,TCF3,OTX2,WASF2,GJC1,IL1RL1,GNA11,ILK,SMARCA4,LLGL1,NCOR1,IL27RA,CD27,TNFSF11,KHDRBS1,TAL1,ID3,PEX5,EDIL3,MSH2,CSF1,ENO1,LYN,NR4A1,RAPGEF1,SOCS3,MPRIP,ERAF,SMAD3,ZFPM1 (includes EG:161882),SP7,PRKG2,CBX5,GATA2,LIMK1,SOX2,JUND,IL23A,E2F2,TEK,EWSR1,EPOR,EPHA1,CDKN2D,RDX,DLL3,MAPK12,ERCC2,S…
Cellular Function and Maintenance	1.39E-05-5.15E-04	EVL,SOCS1,KRAS,LIMS1,CCND1,RB1,LCK,MADD,NR1I2,RARA,TSC2,CSNK2A1,SAFB,ETS1,TP53,CD19,CDCA8,FMNL1,DAXX,CDH1,TIMP4,CCND3,AGTR2,NCKIPSD,CDX1,PRKG1,SMARCA4,ID1,RARB,IGF1R,SLC19A1,COL18A1,CTNNB1,RXRB,MYCN,TNFSF11,GRB2,EGR1,LTBP1,ITGB2,WIPF1,CBS,NTRK3,CSF1,WAS,BMP7,PRKCB,SOCS3,PFN1,TP73,SMAD3,KLF6,PDPK1,BCL6,RARG,BIRC5,HDAC6,PRMT1,DSTN,BRCA1,FGFR1,STK11,CDKN2D,GSN,HAS3,NME3,RHOQ,CD40,CASP2,RHOA,BAP1,MAD…
Post-Translational Modification	6.85E-05-2.98E-03	F12,ST6GAL1,TWF1,DUSP8,UBE2H (includes EG:7328),XDH,GSK3A,CCND1,SRPK2,GAD2,LCK,NR1I2,TSC2,NEK6,STK16,PPM1A,RUVBL2,HIPK2,SIK2,MAP3K9,AKT2,PRKCQ,GYPC,CNTN2,HSPA8,ERCC8,BTG2,SQSTM1,PPIL2,PPP5C,HS3ST5,UBE2C,APOE,ADAMTS13,HSPBP1,ART1,ILK,DNAJA4,SEPX1,FNTA,PRKG1,CDC42BPG,IMPACT,HSP90AB1,CARD10,BRD4,CAMK1G,RPS6KA2,PFDN4,TSTA3,PRKDC,MECP2,COL4A3BP,HIP1,KAT5,EDIL3,CD80,CSF1,NTRK3,FBXO2,MBD3 (includes EG:5…
Infection Mechanism	7.36E-05-3.01E-03	RELA,SUMO3,SFRS2,PLD2,EVX1,CD40LG,SPN,AXIN1,SMAD3,KLF6,NOLC1,RARG,CCND1,SMARCA4,SFRS1,PRMT1,LCK,DNTTIP1,SP1,RARA,RARB,JUND,MYBL2,GNA13,CTNNB1,PTGER4,TP53,E2F4,PRMT2,CFL1,HMGA1,SNW1,GTF2F1,NFKB2,MED14,PARP1,AKAP13,CCND3,CD40,RHOA,GNB2,NCOA1,USF1,EIF2AK2,PML,ESR1,STAG2
Organismal Development	9.08E-05-3.21E-03	GLI2,TLE1,CCNB2,MLLT4,KRAS,NPTX1,SPDEF,CCND1,ADH5 (includes EG:128),POR,RB1,GATAD2A,GDF5,KEAP1,WWOX,GNA13,ZNF45,TP53,AKT2,NPAT,CNR1,HSF1,FGFR2,STAT3,FMOD,OTX2,ARHGDIB,DAXX,NEUROD2,MIB1,HELLS,NKX3-1,WASF2,XRCC5,SPTBN4,USF2,SOCS2,CCBP2,RBBP7,LIMD1,G6PC3,SMARCA4,BBC3,CTBP2,BRD4,RYBP,RNF112,LIG3,PRKDC,TNFSF11,MECP2,GNA12,TNKS2,GFRA2,HIP1,ARVCF,ID3,PES1,FOS,AFF3,PEX5,CBS,MSH2,CSF1,MBD3 (includes EG:53…
Reproductive System Disease	9.31E-05-3.86E-03	AKAP8L,TWF1,LIMS1,POR,LCK,GORASP2,WWOX,SLC2A5,CLNS1A,AKT2,NDUFS7,STK25,NFKB2,CACNA1A,GART,DAXX,DOK1,TRRAP,UBE2C,KIF20A,ILK,FNTA,CDK10,SMARCA4,C9ORF86,CLDN4,PRKD2,TNFSF11,UCP2,TUBB2C,KAT5,BAK1,MAD2L1,MSH2,CSF1,ENO1,NR4A1,LYN,FBXO5,SLC6A4,SOCS3,SMC1A,LIMK1,SOX2,CTSD,TUBA1C,JUND,GPX4,TEK,EWSR1,EPOR,EGR4,CDKN2D,CDK3,AURKAIP1,SMPD2,CDCA2,IGFBP2,HDAC5,MEX3D,BACH1,ADRA2A,BCL2L1,CALB2,PTAFR,ETV5,PEBP1,TP…
Amino Acid Metabolism	9.37E-05-3.55E-03	DUSP8,TWF1,PLK3,TYRO3,GSK3A,CCND1,UPB1,BCAT1,SRPK2,LCK,GAD2,DUSP3,BCAT2,NR1I2,PRPF4B,NEK6,CSNK2A1,STK16,PPM1A,HIPK2,FGR,ATM,MATK,SIK2,STAT5A,AKT2,PRKCQ,PSKH1,FUT10 (includes EG:84750),GAMT,BTG2,GLUL,PDGFD,PPP5C,HS3ST5,APOE,ULK1,DUSP6,ART1,PCTK1,ILK,ACVR2B,FNTB,FNTA,PTPN5,PRKG1,PTPN12,VCAN,CDC42BPG,LTK,TIMM50,TRIB1,PRKX,HUS1,IGF1R,CAMK1G,BRD4,PRKCE,PPM1F,RPS6KA2,CAMK2B,PTPN7,DMPK,COL4A3BP,ITGB2,CB…
Small Molecule Biochemistry	9.37E-05-3.55E-03	TWF1,DUSP8,GSK3A,KRAS,CCND1,GPSM3,GNB1,SRPK2,GAD2,LCK,BCAT2,GAL,NR1I2,NEK6,STK16,PPM1A,HIPK2,SIK2,AKT2,PRKCQ,CNR1,BTG2,PPP5C,HS3ST5,APOE,HTR4,ART1,ILK,FNTA,PRKG1,GPSM1,CDC42BPG,ARF6,ARRB1,BRD4,CAMK1G,RPS6KA2,COL4A3BP,ARF1,CBS,CD80,GPBAR1,LYN,SHMT1,SLC6A4,PSEN1,JAK1,CSNK1A1,PDPK1,PIP5K1B,PRKG2,CDK9,PYY,LIMK1,SRP72,HDAC6,DAO,PRMT1,MAP2K2,BCKDHA,PPP1CA,S1PR5,CSNK1G2,SSTR3,BTG1,MAPK12,PDGFB,ADRA2A,PI…
Organismal Survival	9.58E-05-4.24E-03	ST6GAL1,ECEL1,KRAS,LIMS1,CCND1,POR,ADH5 (includes EG:128),RB1,MADD,NR1I2,PRSS8,KEAP1,TSC2,WWOX,FBLN1,TRAF4,GNA13,HIPK2,TP53,ETS1,ATG5 (includes EG:9474),HSF1,CNR1,FGFR2,NFKB2,STAT3,TCF3,CDH1,RUNX1T1,CCNF,DOK1,WASF2,TRRAP,GJC1,XRCC5,APOE,USP18,IL1RL1,USF2,GNA11,P2RX1,ILK,BECN1,PRKG1,HRH3,SMARCA4,TGM2,HSP90AB1,CTBP2,BRD4,IL27RA,CASP8,PRKDC,TNFSF11,GNA12,TAL1,CNTFR,PTGS1,CUL7 (includes EG:9820),HIP1…
Cardiovascular System Development and Function	1.13E-04-1.13E-04	NODAL,GLI2,ADRBK1,NFATC3,TNNT2,ZFPM1 (includes EG:161882),CCND1,CTBP1,POR,ECE2,GAA,FGF12,TSC2,CASQ2,FGF19 (includes EG:9965),ATM,SOX4,OVOL2,BCOR,PKP2,EPOR,CRKL,HIRA,IFT57,TNNI3,PDGFB,HDAC5,POU6F1,CCND3,PDLIM3,MIB1,DVL2 (includes EG:1856),TXNRD2,GJC1,MAP2K5,PBRM1,SPTBN1,ID2,GNA11,FKBP1A,MIXL1,CRK,ACVR2B,SMARCA4,VCAN,ID1,GLI3,CTBP2,SMO,ERBB2,CTNNB1,CASP8,PRKDC,PAK4,PXN,GNAQ,MESP1,NFATC1,ERBB3,NFATC…
Organ Development	1.13E-04-3.21E-03	SOCS3,NODAL,GLI2,ADRBK1,NFATC3,TNNT2,ZFPM1 (includes EG:161882),CCND1,CTBP1,POR,RB1,HBB (includes EG:3043),ECE2,GAA,FGF12,TSC2,CASQ2,FGF19 (includes EG:9965),ATM,SOX4,OVOL2,BCOR,PKP2,EPOR,CRKL,HIRA,IFT57,TNNI3,CSF3,PDGFB,HDAC5,POU6F1,MDM4,CCND3,PDLIM3,MIB1,DVL2 (includes EG:1856),TXNRD2,GJC1,MAP2K5,EPO,PBRM1,SPTBN1,SH2B3,SPIB,ID2,GNA11,FKBP1A,MIXL1,CRK,ACVR2B,SMARCA4,VCAN,ID1,GLI3,CTBP2,SMO,ERBB2…
Immunological Disease	1.5E-04-5.96E-04	BAD,CD3E,TP73,ABL1,GAPDH (includes EG:2597),DFFA,TCF7,BIRC5,BCL2,TGM2,IKBKB,CASP9,TOP2A,CTNNB1,BRCA1,CASP8,CD24,ATM,TP53,PRKDC,EGR1,BAX,KLF13,ID3,BAK1,XIAP,PARP1,FOS,BCL2L1,GNAS,WAS,E2F1,NR4A1,PIK3CD,SMARCC1,CDK2,BCL2L11,MAP2K5
Cell Signaling	1.74E-04-3.6E-03	GCHFR,GLI2,AXIN1,KRAS,DAB1,GPSM3,TMED4,PTCH2,GNB1,SRPK2,LCK,MADD,GAL,NEK6,VAMP3,ZC3H15,STK16,PPM1A,GNA13,HIPK2,HS1BP3,SIK2,TP53,AKT2,CNR1,CRKL,HMGA1,STAT3,THOP1,FMOD,OTX2,ARHGDIB,MCHR1,PIK3CD,DOK1,WASF2,SQSTM1,PPP5C,ECSIT,HTR4,GFRA3,IL1RL1,SEMA6A,SOCS2,CD74,GPSM1,TGM2,ARF6,ARRB1,LLGL1,TAOK2 (includes EG:9344),IL27RA,RPS6KA2,CD27,KHDRBS1,GRB2,GNA12,CNTFR,GDI2,GFRA2,BAK1,WIPF1,NTRK3,CSF1,GPBAR1,SH2…
Endocrine System Disorders	1.98E-04-1.44E-03	NOS1,MAGED1,UNC5A,GAPDH (includes EG:2597),PTPRF,VCAN,BCL2,GAL,SPHK2,SP1,FREQ,GNA13,E2F2,TP53,AGAP2,UCP2,ATF3,GNA12,G6PD,BAX,DRD2,MAPK12,XIAP,ADRA2A,BCL2L1,APBB1,PPP2R1A,RRAS2,GAB1,CASP2,PRKCD,BTG2,TFCP2,HTT,PSAP,CYCS (includes EG:54205),PPP2R1B,BCL2L11,AGTR2,AKAP1
Nucleic Acid Metabolism	3.54E-04-3.54E-04	GRPR,F2R,HTR4,KRAS,CHRM3,GPSM1,PYY,GPSM3,GNB1,ARF6,ARRB1,GAL,S1PR5,CNR1,SSTR3,GNAQ,SLC18A2,RASD1,ADRA2A,CYTH4,SSTR2,CXCL12,GPBAR1,OPRK1,GNAO1,SLC6A4
Organismal Injury and Abnormalities	3.67E-04-1.79E-03	KRT8,CD4,MMP14,CCND1,CDK2
Vitamin and Mineral Metabolism	3.76E-04-3.76E-04	GRIN1,F2RL1,CNR1,CXCL12,CHRM3,BAK1,BCL2
Protein Synthesis	5.15E-04-2.52E-03	EVL,GCHFR,UBE2H (includes EG:7328),PRKAB1,AXIN1,UBE2L3,TNNT2,LIMS1,RNF40,SPAG9,NPM2,HBB (includes EG:3043),TSC2,PSMC2,P2RX2,TP53,EGLN2,ATG4B,ACHE,FMNL1,SKP2,UBE2G2,KCNB1,CDH1,ANAPC5,SYT1,SQSTM1,GOPC,PPP5C,UBE2C,APOE,SERPINB1,NCKIPSD,P2RX1,CTNNA1,PSENEN,TGM2,IGF1R,CTNNB1,CASP8,HGS,AMFR,TNFSF11,CLN3,GRB2,MAT1A,FZR1,RRM1 (includes EG:6240),APH1A (includes EG:51107),ITGB2,WIPF1,FBXL12,CSF1,WAS,FBXO2,…
Cell-mediated Immune Response	5.46E-04-1.26E-03	CD247,SOCS1,SOCS3,HLA-DOA,CD40LG,PLP1,BAD,CD3E,NFATC3,PDPK1,ZFPM1 (includes EG:161882),BCL6,GATA2,CCND1,CD8B,TCF7,BIRC5,IKBKB,LCK,IL23A,BRCA1,TAPBP,HS1BP3,ATM,SOX4,TP53,ETS1,STAT5A,AKT2,PRKCQ,MLLT10,EPHA1,HMGA1,ACHE,IL27,STAT3,TCF3,LRRC23,PATZ1,BSG,XRCC6,E2F1,HSP90AA1,PIK3CD,XRCC5,PRDX2,RELA,ID2,TCF4,SPIB,ICAM1,PICALM,CHD4,IL1RL1,IKZF1,IGHG1,CD74,IL2RB,SMARCA4,BCL2,ID1,WASL (includes EG:8976),LAM…
Cellular Movement	6.03E-04-3.65E-03	PLD2,ATP6V0C,F2R,XDH,SPDEF,CCND1,PTGER1,BCAN,EZR,FBLN1,CSNK2A1,MATK,TP53,ETS1,AKT2,CFL1,STK25,SNAI1,HMGA1,STAT3,TCF3,CSF3,SKP2,CDH1,TIMP4,BSG,GAB1,FSCN1,CDC14A,WASF2,SFRP1,LRIG1,TRRAP,KIF20A,UNC5A,RAB35,ILK,FKBP1A,CRK,IGHG1,GPR182,ID1,ARF6,YY1,CLDN4,TOP2A,IGF1R,PRKCE,PIK3R2,SH3GLB2 (includes EG:56904),COL18A1,CTNNB1,MYCN,AGAP2,CHGA,LZTS2,VIM,PLCG1,PLK1,GNAI3,ITGB2,TRIO,CSF1,TAGLN,BMP7,GJB1,CLDN3,…
Tissue Development	6.2E-04-6.2E-04	ECSIT,SFRP2,FOXH1,TAL1,SMO,DVL2 (includes EG:1856),SFRP1,CTNNB1,PTGER4,PSEN1
Protein Degradation	6.2E-04-6.2E-04	PSMB3,RELA,SERPINB1,UBE2H (includes EG:7328),CDC20,AXIN1,UBE2N,UBE2L3,USP11,RNF40,PSENEN,HDAC6,GRIN2C,VCP,ARIH2,PSMC2,HGS,AMFR,EGLN2,CLN3,PJA1,UBE4B,ATG4B,UBE3A,FZR1,SKP2,APH1A (includes EG:51107),ARIH1,UBE2G2,FAF1,MDM4,FBXL12,CSF1,UBE2G1,FBXO2,ANAPC5,SGSM3,SQSTM1,UBE2I,PSEN1,UBE2C
Cellular Response to Therapeutics	7.18E-04-1.14E-03	TP53,PRKDC,EPOR,TERT,ERBB3,BAX,BCL2,PARP1,MSH2,XRCC6,XRCC5,AIFM1,ATM
RNA Post-Transcriptional Modification	8.81E-04-2.11E-03	HNRNPH1,SFRS2,SFRS9,SRPK1,CUGBP1,PCBP1 (includes EG:5093),SFRS4,SF3B2,TXNL4A (includes EG:10907),SUPT5H,SRPK2,SFRS1,TNRC4,SNRPA,HBB (includes EG:3043),PABPC4,PRPF4B,GEMIN7,SAFB,SNRPC,RNGTT,LSM4,EIF4B,DDX54,NONO,DDX23,NUFIP1,PHF5A,SNW1,SFRS3,PTBP1,CTDP1,HTT,PABPN1,SF3B4,U2AF1,HNRNPAB,SRRM1,SFRS8,DHX38,PRPF8,DKC1,CPSF1,SFRS15,POLR2A,CSTF2T,UPF1,HNRNPA0,BRUNOL4,HNRNPC,KHSRP,PRPF31,CDC5L,SNRNP40,SNRP…
Nervous System Development and Function	9.47E-04-3.95E-03	GPR6,KRAS,NPTX1,GAL,BCAN,HTR7,MATK,SEMA5A,CNR1,ACAN,GPRIN1,YWHAZ,L1CAM,STAT3,CACNA1A,CNTN2,GAB1,MIB1,E2F1,HTT,ELMO2,APOE,ARHGEF7,SOCS2,RBBP7,CRK,PRKG1,VCAN,TGM2,SYNGAP1,DOK4,DISC1,CNTFR,GNAQ,VIM,GFRA2,TRIO,CSF1,NTRK3,FKBP4,HAP1,PSAP,BMP7,GJB1,MPRIP,MAPK1,TP73,NFATC3,DPYSL4,LIMK1,SH2B1,IKBKB,FGFR4,LAMA1,EFNB3,RALGDS,UBE4B,FGFR1,BACE1,NEU3,PIP5K1A,RHOQ,CORO1B,PTPN11,PRKCD,RHOA,GNAO1,SYN3,MDK,CNPY2,…
Cell-To-Cell Signaling and Interaction	1.23E-03-1.23E-03	SFRS2,DBN1,FGF4,ITGB2,LCK,PTPN11,PKP2,GJD2,RPA1,GJB1,LTK
Protein Folding	1.44E-03-1.44E-03	HSPA8,DNAJA4,FKBP1A,HSP90AA1,DNAJA2,HSPD1
Developmental Disorder	1.5E-03-1.96E-03	TP53,GLI2,LMO4,FKBP1A,MAP3K4,CCND1,ROR2,MARCKSL1,GLI3,SPHK2,FRAS1,RARA,E2F1,MARCKS (includes EG:4082),HIPK2,HIPK1,PML,CTNNB1,DEAF1
Digestive System Development and Function	1.79E-03-1.79E-03	EPO,RB1,MDM4,EPOR
Hepatic System Development and Function	1.79E-03-1.79E-03	EPO,RB1,MDM4,EPOR
Hepatic System Disease	1.79E-03-1.79E-03	RARA,E2F1,PML,CCND1
Organ Morphology	1.79E-03-1.79E-03	RARA,E2F1,PML,CCND1
Tumor Morphology	1.81E-03-3.13E-03	TP53,APOE,MYCN,SRC,TERT,KRAS,PDGFB,IGFBP2,FUS,PARP1,COL1A1,RB1,BTG2,E2F1,NR2F6,ERBB2
Humoral Immune Response	2.88E-03-2.88E-03	SIGLEC1,CD80,NFATC3,GNA12,NFKB2,GNA13,TNFRSF13C,BCL2L11
Tissue Morphology	2.88E-03-2.88E-03	SIGLEC1,CD80,NFATC3,GNA12,NFKB2,GNA13,TNFRSF13C,BCL2L11
Lipid Metabolism	3.15E-03-3.15E-03	ROCK2,ARF6,ARF1,PIP5K1A,INPP5E,RHOA,GNAQ,EEF1A1,PIP5K1B
Metabolic Disease	3.21E-03-3.21E-03	RB1,APOE,HMOX1,FGFR1,CXCL12,TCF3,BCL6,CD27,CCND1,PSEN1
