# Supplementary material for: Persistent Donor Cell Gene Expression among Human Induced Pluripotent Stem Cells Contributes to Differences with Human Embryonic Stem Cells
Source: PLoS One. 2010 Feb 1;5(2):e8975. doi: 10.1371/journal.pone.0008975 (PMC2813859; doi:10.1371/journal.pone.0008975)
Supplement: Table S3 — Functional analysis of the (A1) upregulated genes in iPS-hFFib designating a unique hiPSC state; (A2) downregulated genes in iPS-hFFib designating a unique hiPSC state. (B1) upregulated genes in iPS-hASC designating a unique hiPSC state; (B2) downregulated genes in iPS-hASC designating a unique hiPSC state. (C1) upregulated genes in iPS-hNFib designating a unique hiPSC state; (C2) downregulated genes in iPS-hNFib designating a unique hiPSC state. (D1) upregulated genes in iPS-hKT designating a unique hiPSC state; (D2) downregulated genes in iPS-hKT designating a unique hiPSC state. (0.12 MB XLS) [file pone.0008975.s007.xls]

## Sheet: S3-A1
Table S3-A1. Functional analysis of the upregulated genes in iPS-hFFib designating a unique hiPSC state
Category	P-value	Molecules
Cell Signaling	9.97E-07-2E-02	CALCB (includes EG:797),GNAS,ADCY2,SPP1,EDNRB,HTR7,NEFM,NRK,GNA14,VSNL1
Nucleic Acid Metabolism	7.14E-06-8.71E-03	CALCB (includes EG:797),GNAS,ADCY2,EDNRB,ABCG2,HTR7,NEFM,VSNL1
Molecular Transport	1.36E-05-4.2E-02	CALCB (includes EG:797),GNAS,LRAT,SPP1,EDNRB,ABCG2,HTR7,NEFM,GNA14,VSNL1
Small Molecule Biochemistry	1.36E-05-3.95E-02	ADCY2,SPP1,SULT1C4,EDNRB,ABCG2,GNA14,GNAS,CALCB (includes EG:797),LRAT,HTR7,NEFM,VSNL1,SFN
Cardiovascular System Development and Function	1.84E-05-3.95E-02	GNAS,TPM1,CALCB (includes EG:797),SPP1,EDNRB,RGS5,ACTG2 (includes EG:72),ACTC1
Tissue Morphology	1.84E-05-3.71E-02	GNAS,TPM1,CALCB (includes EG:797),SPP1,RGS5,EDNRB,DTNA,ACTG2 (includes EG:72),ACTC1
Neurological Disease	3.82E-05-4.68E-02	ADCY2,SPP1,EDNRB,ABCG2,FAM71F1,FAT3,C7ORF16,NRK,IGSF5,GNA14,GNAS,SPARCL1,SOX3,PLD5,HTR7,ANXA3,NEFM,BBS9,DTNA,VSNL1,ID4
Organ Morphology	9.18E-05-4.44E-02	GNAS,TPM1,CALCB (includes EG:797),SPP1,EDNRB,ACTG2 (includes EG:72),ACTC1
Cellular Development	4E-04-2.28E-02	SPP1,EDNRB,ABCG2,SOX3,SFN,ID4
Reproductive System Development and Function	4E-04-3.47E-02	CALCB (includes EG:797),GNAS,SPP1,SOX3,SEMG1 (includes EG:6406),ID4
Hair and Skin Development and Function	4.72E-04-3.71E-02	SPP1,EDNRB,ABCG2,SFN,ID4
Tissue Development	4.76E-04-4.51E-02	CALCB (includes EG:797),GNAS,TPM1,SPP1,ACTC1
Vitamin and Mineral Metabolism	5.73E-04-3.22E-02	CALCB (includes EG:797),GNAS,LRAT,SPP1,EDNRB,HTR7,GNA14
Genetic Disorder	6.62E-04-3.71E-02	TPM1,C10ORF82,FAT3,NRK,IGSF5,GNA14,CALCB (includes EG:797),LRAT,RGS5,METT10D,PLD5,SOX3,HTR7,NEFM,ACTG2 (includes EG:72),ACTC1,ADCY2,SPP1,EDNRB,ABCG2,SH3GL3,FAM71F1,C7ORF16,GNAS,SPARCL1,ANXA3,DTNA,BBS9,VSNL1,ID4
Cardiovascular Disease	9.72E-04-3.71E-02	TPM1,SPP1,EDNRB,SH3GL3,C7ORF16,GNA14,GNAS,RGS5,METT10D,PLD5,HTR7,DTNA,ACTG2 (includes EG:72),VSNL1,ACTC1
Inflammatory Disease	1.25E-03-3.95E-02	SPP1,EDNRB
Respiratory Disease	1.25E-03-3.47E-02	SPP1,EDNRB
Skeletal and Muscular System Development and Function	1.27E-03-3.95E-02	TPM1,CALCB (includes EG:797),GNAS,SPP1,DTNA,ACTC1
Cancer	1.41E-03-4.92E-02	TPM1,ADCY2,SPP1,EDNRB,ABCG2,C7ORF16,CR1L,GNAS,CALCB (includes EG:797),SERPINB9,RGS5,NEFM,DTNA,VSNL1,SFN,ACTC1,ID4
Nervous System Development and Function	1.49E-03-4.44E-02	CALCB (includes EG:797),SPP1,EDNRB,SOX3,SH3GL3,NEFM,C7ORF16,DTNA,ID4
Cell Morphology	1.56E-03-3.71E-02	GNAS,CALCB (includes EG:797),TPM1,LRAT,SPP1,EDNRB,HTR7,NEFM,DTNA,SFN,ACTC1
Metabolic Disease	1.64E-03-3.47E-02	ADCY2,SPP1,EDNRB,C10ORF82,SH3GL3,FAT3,C7ORF16,GNA14,GNAS,RGS5,PLD5,HTR7,BBS9,DTNA
Renal and Urological Disease	1.64E-03-2.74E-02	SPP1,EDNRB
Cellular Assembly and Organization	1.73E-03-4.7E-02	CALCB (includes EG:797),GNAS,TPM1,LRAT,SPP1,NEFM,DTNA,SFN,ACTC1
Cell Cycle	2.52E-03-3.95E-02	TPM1,CALCB (includes EG:797),GNAS,ADCY2,SPP1,SFN,ID4
Cell Death	2.52E-03-4.92E-02	TPM1,CALCB (includes EG:797),GNAS,SPP1,ABCG2,C7ORF16,SFN,ID4
Cell-To-Cell Signaling and Interaction	2.52E-03-3.95E-02	GNAS,CALCB (includes EG:797),SPP1,ABCG2,NEFM,DTNA,VSNL1
Cellular Compromise	2.52E-03-4.2E-02	TPM1,SPP1,ANXA3,NEFM,DTNA,SFN
Cellular Function and Maintenance	2.52E-03-3.22E-02	CALCB (includes EG:797),ABCG2,NEFM,ACTC1
Cellular Growth and Proliferation	2.52E-03-4.92E-02	CALCB (includes EG:797),ADCY2,SPP1,ID4
Cellular Movement	2.52E-03-3.95E-02	GNAS,TPM1,SPP1,EDNRB,VSNL1
Cellular Response to Therapeutics	2.52E-03-1E-02	ABCG2
Dermatological Diseases and Conditions	2.52E-03-3.71E-02	SPP1,EDNRB,ABCG2,SFN
Drug Metabolism	2.52E-03-3.95E-02	SPP1,SULT1C4,ABCG2,SFN
Embryonic Development	2.52E-03-4.68E-02	CALCB (includes EG:797),EDNRB,ABCG2
Endocrine System Development and Function	2.52E-03-2.24E-02	GNAS,CALCB (includes EG:797),SULT1C4,SPP1,ABCG2,SFN
Endocrine System Disorders	2.52E-03-4.92E-02	ADCY2,SPP1,C10ORF82,EDNRB,SH3GL3,FAT3,GNA14,GNAS,CALCB (includes EG:797),RGS5,SOX3,PLD5,HTR7,DTNA,BBS9
Energy Production	2.52E-03-2.52E-03	ABCG2
Gastrointestinal Disease	2.52E-03-2.74E-02	SPP1,EDNRB,SFN
Hepatic System Disease	2.52E-03-3.95E-02	SPP1
Lipid Metabolism	2.52E-03-3.22E-02	LRAT,SULT1C4,SPP1,ABCG2,SFN
Organismal Injury and Abnormalities	2.52E-03-3.95E-02	GNAS,CALCB (includes EG:797),SPP1,CR1L
Connective Tissue Development and Function	4.98E-03-3.47E-02	GNAS,CALCB (includes EG:797),ADCY2,SPP1,HTR7
Amino Acid Metabolism	5.03E-03-5.03E-03	EDNRB
Connective Tissue Disorders	5.03E-03-3.95E-02	GNAS,SPP1
Digestive System Development and Function	5.03E-03-1.25E-02	CALCB (includes EG:797),GNAS,EDNRB
Hematological Disease	5.03E-03-2.74E-02	GNAS,SPP1,EDNRB,ABCG2
Hematological System Development and Function	5.03E-03-3.11E-02	GNAS,CALCB (includes EG:797),SPP1,EDNRB,ABCG2
Hepatic System Development and Function	5.03E-03-3.47E-02	GNAS,SPP1
Immunological Disease	5.03E-03-4.44E-02	GNAS,SPP1
Renal and Urological System Development and Function	5.03E-03-7.53E-03	SPP1,EDNRB,ABCG2
Reproductive System Disease	5.03E-03-4.68E-02	TPM1,GNAS,ADCY2,SERPINB9,SPP1,EDNRB,RGS5,ABCG2,SFN,ACTC1
Skeletal and Muscular Disorders	5.03E-03-3.71E-02	GNAS,CALCB (includes EG:797),SPARCL1,SPP1,FAM71F1,NEFM,DTNA,IGSF5
Carbohydrate Metabolism	6.2E-03-3.95E-02	SPP1,EDNRB,ABCG2,GNA14
Gene Expression	7.53E-03-1E-02	GNAS
Immune Cell Trafficking	7.53E-03-3.11E-02	GNAS,SPP1,EDNRB
Organ Development	7.53E-03-2.98E-02	GNAS,EDNRB
Visual System Development and Function	7.53E-03-7.53E-03	LRAT
Cell-mediated Immune Response	9.32E-03-3.77E-02	GNAS,CALCB (includes EG:797),SPP1,EDNRB
Hematopoiesis	9.32E-03-9.32E-03	CALCB (includes EG:797),SPP1
DNA Replication, Recombination, and Repair	1E-02-1E-02	SFN
Tumor Morphology	1E-02-2.24E-02	TPM1,SPP1
Inflammatory Response	1.25E-02-4.2E-02	CALCB (includes EG:797),GNAS,SPP1,EDNRB,ANXA3,CR1L
Psychological Disorders	2.27E-02-2.27E-02	GNAS,PLD5,ANXA3,FAT3,DTNA,BBS9,GNA14
Antigen Presentation	2.42E-02-3.77E-02	CALCB (includes EG:797),GNAS,SPP1,EDNRB
Organismal Development	2.44E-02-2.44E-02	CALCB (includes EG:797),GNAS,ABCG2
Protein Trafficking	2.49E-02-2.49E-02	EDNRB
Developmental Disorder	2.61E-02-3.71E-02	TPM1,GNAS,SOX3,BBS9,ACTG2 (includes EG:72),ACTC1
Ophthalmic Disease	3.47E-02-3.47E-02	LRAT
Humoral Immune Response	3.77E-02-3.77E-02	CALCB (includes EG:797),GNAS,SPP1,EDNRB
Protein Synthesis	4.44E-02-4.44E-02	SPP1

## Sheet: S3-A2
Table S3-A2. Functional analysis of the downregulated genes in iPS-hFFib designating a unique hiPSC state
Category	P-value	Molecules
Connective Tissue Development and Function	1.69E-05-1.85E-02	NFIX,GATA6,HAS2,TWSG1
Skeletal and Muscular System Development and Function	1.69E-05-2.12E-02	NFIX,NR2F2,GATA6,TWSG1
Tissue Development	1.69E-05-4.13E-02	NFIX,MAF,NR2F2,HAS2,GATA6,TWSG1
Cellular Function and Maintenance	3.23E-04-2.04E-02	GATA6,HAS2,COL3A1
Organ Development	7.19E-04-4.04E-02	MAF,NR2F2,GATA6,HAS2,TWSG1,COL3A1
Cancer	9.35E-04-4.79E-02	TMTC1,MAF,GATA6,HAS2,MXRA5,TTC3,COL3A1
Connective Tissue Disorders	9.35E-04-1.87E-03	NFIX,COL3A1
Dermatological Diseases and Conditions	9.35E-04-4.67E-02	COL3A1
Developmental Disorder	9.35E-04-2.5E-02	NFIX,NR2F2,GATA6,TWSG1
Genetic Disorder	9.35E-04-4.79E-02	TMTC1,MAF,GATA6,TWSG1,MXRA5,TTC3,COL3A1
Reproductive System Disease	9.35E-04-4.76E-02	HAS2,GATA6
Respiratory System Development and Function	9.35E-04-7.46E-03	NFIX,GATA6
Skeletal and Muscular Disorders	9.35E-04-1.87E-03	NFIX,NR2F2,COL3A1
Tissue Morphology	9.35E-04-1.3E-02	NFIX,NR2F2,HAS2,GATA6
Cardiovascular System Development and Function	1.01E-03-3.22E-02	NR2F2,HAS2,GATA6,COL3A1
Organismal Survival	1.23E-03-1.23E-03	NFIX,NR2F2,GATA6,HAS2,TWSG1
Carbohydrate Metabolism	1.87E-03-9.31E-03	HAS2
Cell Cycle	1.87E-03-4.72E-02	HAS2,GATA6
Cellular Assembly and Organization	1.87E-03-4.85E-02	NFIX,HAS2,COL3A1
Drug Metabolism	1.87E-03-9.31E-03	HAS2
Embryonic Development	1.87E-03-4.79E-02	NFIX,HAS2,GATA6,TWSG1
Molecular Transport	1.87E-03-1.12E-02	GATA6,HAS2
Small Molecule Biochemistry	1.87E-03-9.31E-03	HAS2
Nervous System Development and Function	2.45E-03-4.31E-02	NFIX,NR2F2,TWSG1
Cellular Growth and Proliferation	2.8E-03-4.76E-02	NFIX,MAF,GATA6,HAS2
Gene Expression	2.8E-03-4.31E-02	NFIX,MAF,NR2F2,GATA6
Cell Death	3.74E-03-3.74E-03	GATA6
Neurological Disease	3.74E-03-1.95E-02	NFIX,TMTC1,MXRA5,TTC3
Organ Morphology	3.74E-03-1.67E-02	MAF,GATA6,TWSG1
Visual System Development and Function	3.74E-03-1.67E-02	MAF
Cellular Movement	4.67E-03-3.59E-02	NFIX,NR2F2,HAS2
Cardiovascular Disease	5.6E-03-7.46E-03	HAS2,COL3A1
Cell Morphology	5.6E-03-2.95E-02	MAF,HAS2,GATA6
Cell-mediated Immune Response	5.6E-03-4.67E-02	MAF,TWSG1
Cellular Development	5.6E-03-4.67E-02	NFIX,MAF,HAS2,TWSG1
Hematological System Development and Function	5.6E-03-4.67E-02	MAF,TWSG1
Organismal Development	8.39E-03-4.79E-02	NR2F2,GATA6,TWSG1
Hematological Disease	9.31E-03-9.31E-03	TWSG1
Immunological Disease	9.31E-03-1.67E-02	TWSG1
Protein Trafficking	1.12E-02-1.12E-02	GATA6
Cell-To-Cell Signaling and Interaction	1.49E-02-4.85E-02	MAF,HAS2,COL3A1
Hematopoiesis	1.56E-02-4.67E-02	MAF,TWSG1
Ophthalmic Disease	1.58E-02-1.58E-02	MAF
Renal and Urological Disease	1.95E-02-1.95E-02	HAS2
Digestive System Development and Function	2.04E-02-2.04E-02	COL3A1
Gastrointestinal Disease	3.59E-02-4.79E-02	HAS2,GATA6,COL3A1
Reproductive System Development and Function	3.86E-02-3.86E-02	HAS2
Cell Signaling	3.95E-02-3.95E-02	TWSG1
Hair and Skin Development and Function	4.04E-02-4.04E-02	COL3A1

## Sheet: S3-B1
Table S3-B1. Functional analysis of the upregulated genes in iPS-hASC designating a unique hiPSC state
Category	P-value	Molecules
Cellular Assembly and Organization	4.87E-07-1.6E-02	ANK3,APOE,LPAR4,RND1,NEFL,PTN,PYY,CHAF1A,KISS1R,CALCB (includes EG:797),NEFM,FABP7,KIF5C,ACTA1,CD19,SPP1,DNER,NEFH,KLK8,RAC3,GNAS,CSPG5,STMN3,GPM6A,GAP43,DCX
Cell-To-Cell Signaling and Interaction	5.09E-07-1.6E-02	ANK3,APOE,F12,RND1,NEFL,PTN,FKBP1A,TAC1,CXCL5,GPC3,PYY,CXCL3,CALCB (includes EG:797),NEFM,FABP7,IL27RA,TNFRSF10A (includes EG:8797),RASGRP2,GULP1,TNFSF11,CD19,KCNN2,SPP1,PCSK9,NEFH,KLK8,IGFBP2,CXCL6,KLKB1,GNAS,LYN,RLN2,VSNL1,PRKCB
Cellular Function and Maintenance	5.09E-07-1.6E-02	APOE,TNFSF11,CD19,NEFL,NEFH,HSPA2,PYY,CHAF1A,CALCB (includes EG:797),NEFM,LYN,PRKCB,GULP1
Nervous System Development and Function	5.09E-07-1.6E-02	ANK3,APOE,RND1,NEFL,PTN,TAC1,PYY,KISS1R,CALCB (includes EG:797),CXCL3,NEFM,FABP7,JPH4,KIF5C,KCNN2,EDNRB,DNER,NEFH,KLK8,RAC3,GNAS,TFAM,CSPG5,STMN3,LYN,SOX8,GAP43,DCX
Cell Morphology	2.02E-06-1.6E-02	ANK3,APOE,CD19,TNFSF11,TNNT1,SPP1,RND1,EDNRB,NEFL,DNER,PTN,TAC1,NEFH,PYY,IGFBP2,GNAS,SFRS1,CSPG5,NEFM,LYN,GAP43,DCX
Cancer	2.49E-06-1.6E-02	F12,CUL4A,ARG2,GPC3,PYY,CHAF1A,CALCB (includes EG:797),CXCL3,WIF1,NPTX2,NEFM,FABP7,FAM124A,TMEM97,RASGRP2,CDC25A,CD19,SPP1,PCSK9,MT1X,RNASEH2A,TFPI2,IGFBP2,KLKB1,STMN3,RLN2,GPM6A,TEAD4,ANK3,CA2,APOE,PTN,TAC1,FKBP1A,CXCL5,FAM54A,RGS5,CMTM8,HSPE1,IL27RA,TNFRSF10A (includes EG:8797),TNFSF11,EDNRB,TUBA4A,CXCL6,LYAR,GNAS,CLGN,FBXO2,LYN,GAP43,DCX,PRKCB
Gastrointestinal Disease	2.49E-06-1.6E-02	TEAD4,ANK3,APOE,CA2,F12,SPP1,TUBA4A,FKBP1A,ARG2,RNASEH2A,LYAR,CHAF1A,CLGN,NPTX2,HSPE1,TMEM97,PRKCB
Cell Signaling	3.72E-06-1.6E-02	APOE,CD19,SPIB,TNFSF11,LPAR4,SPP1,EDNRB,PTN,TAC1,FKBP1A,ARG2,PYY,GNAS,CALCB (includes EG:797),CXCL3,NEFM,LYN,RLN2,NPW,GAP43,VSNL1,PRKCB
Molecular Transport	3.72E-06-1.6E-02	APOE,SLC16A10,TNFSF11,CD19,LPAR4,SPP1,EDNRB,TAC1,FKBP1A,PYY,KISS1R,GNAS,CALCB (includes EG:797),CXCL3,TFAM,NEFM,LYN,NPW,GAP43,VSNL1,PPAP2C,PRKCB
Vitamin and Mineral Metabolism	3.72E-06-1.6E-02	APOE,TNFSF11,CD19,SPP1,EDNRB,FKBP1A,TAC1,PYY,CXCL3,CALCB (includes EG:797),GNAS,RBP7,LYN,PRKCB
Hematological System Development and Function	9.25E-06-1.62E-02	F12,APOE,SPIB,CUL4A,TAC1,FKBP1A,CXCL5,CXCL3,CALCB (includes EG:797),CCNA1,IL27RA,TNFRSF10A (includes EG:8797),GULP1,RASGRP2,TNFSF11,CD19,SPP1,EDNRB,KLK8,CXCL6,KLKB1,GNAS,LYN,RLN2,PRKCB
Immune Cell Trafficking	9.25E-06-1.62E-02	APOE,TNFSF11,CD19,SPP1,EDNRB,FKBP1A,TAC1,CXCL5,CXCL6,KLKB1,GNAS,CXCL3,LYN,RLN2,IL27RA,TNFRSF10A (includes EG:8797),RASGRP2,PRKCB
Inflammatory Response	9.25E-06-1.62E-02	APOE,F12,TNFSF11,CD19,SPP1,EDNRB,TAC1,FKBP1A,CXCL5,KLK8,CXCL6,CALCB (includes EG:797),GNAS,CXCL3,KLKB1,LYN,NPW,GAP43,IL27RA,TNFRSF10A (includes EG:8797),GULP1,PRKCB
Skeletal and Muscular System Development and Function	1.1E-05-1.6E-02	ANK3,CA2,APOE,TNNT1,TNFSF11,SPP1,EDNRB,PTN,FKBP1A,TAC1,ARG2,PYY,GNAS,CALCB (includes EG:797),SFRS1,WIF1,LYN,RLN2,SOX8,JPH4,ACTA1
Genetic Disorder	5.65E-05-1.6E-02	TEAD4,F12,APOE,CA2,TNNT1,DDX25,NEFL,SLC35D3,CA4,FKBP1A,TAC1,GPC3,CHAF1A,CKB,FXYD6,HSPE1,NEFM,FABP7,IL27RA,ACTA1,TMEM97,RASGRP2,TNFSF11,SPP1,EDNRB,PCSK9,MT1X,TUBA4A,NEFH,RNASEH2A,HSPA2,LYAR,KLKB1,GNAS,C2ORF40,GAP43,VSNL1,DCX,PRKCB
Antigen Presentation	5.68E-05-1.6E-02	F12,APOE,TNFSF11,CD19,SPP1,EDNRB,FKBP1A,TAC1,CXCL5,KLK8,CXCL6,CALCB (includes EG:797),GNAS,CXCL3,KLKB1,LYN,NPW,GAP43,IL27RA,TNFRSF10A (includes EG:8797),PRKCB
Cell-mediated Immune Response	5.68E-05-1.6E-02	F12,APOE,TNFSF11,CD19,SPP1,EDNRB,FKBP1A,TAC1,CXCL5,KLK8,CXCL6,CALCB (includes EG:797),GNAS,CXCL3,KLKB1,LYN,NPW,GAP43,IL27RA,TNFRSF10A (includes EG:8797),PRKCB
Humoral Immune Response	5.68E-05-2.88E-03	F12,APOE,CD19,TNFSF11,SPP1,EDNRB,FKBP1A,TAC1,CXCL5,KLK8,CXCL6,CALCB (includes EG:797),GNAS,CXCL3,KLKB1,LYN,NPW,GAP43,IL27RA,TNFRSF10A (includes EG:8797),PRKCB
Neurological Disease	5.86E-05-1.6E-02	ANK3,APOE,CA2,TNNT1,DDX25,NEFL,CA4,SLC35D3,PTN,TAC1,PYY,CKB,CXCL3,FXYD6,NEFM,FABP7,IL27RA,RASGRP2,SPP1,EDNRB,MT1X,TUBA4A,NEFH,HSPA2,IGFBP2,GNAS,FBXO2,LYN,C2ORF40,GAP43,VSNL1,DCX,PRKCB
Cellular Growth and Proliferation	6.43E-05-1.6E-02	TEAD4,APOE,F12,SPIB,CUL4A,PTN,TAC1,FKBP1A,CXCL5,GPC3,PYY,KISS1R,CXCL3,CALCB (includes EG:797),WIF1,CCNA1,FABP7,IL27RA,TNFRSF10A (includes EG:8797),CDC25A,CD19,TNFSF11,SPP1,EDNRB,MT1X,TFPI2,KLK8,IGFBP2,FBXO2,LYN,RLN2,PPAP2C,PRKCB,SALL4
Endocrine System Development and Function	6.43E-05-1.6E-02	GNAS,WIF1,SPP1,PYY,IGFBP2
Psychological Disorders	8.37E-05-8.37E-05	APOE,GNAS,DDX25,NEFL,FXYD6,TUBA4A,NEFM,TAC1,FABP7,GAP43,HSPA2,PRKCB
Tissue Morphology	9.3E-05-1.6E-02	APOE,TNFSF11,TNNT1,SPP1,EDNRB,NEFL,FKBP1A,TAC1,ARG2,IGFBP2,KISS1R,CALCB (includes EG:797),GNAS,SFRS1,RGS5,FBXO2,NEFM,RLN2,SOX8,KIF5C,GAP43,ACTA1
Cardiovascular System Development and Function	1.06E-04-1.6E-02	ANK3,TEAD4,APOE,TNFSF11,SPP1,EDNRB,PTN,TAC1,CXCL5,CALCB (includes EG:797),SFRS1,RGS5,RLN2
Cellular Movement	1.27E-04-1.62E-02	ANK3,APOE,RND1,PTN,TAC1,CXCL5,PYY,KISS1R,CXCL3,FABP7,KIF5C,IL27RA,RASGRP2,TNFSF11,SPP1,EDNRB,TFPI2,IGFBP2,CXCL6,GNAS,LYN,RLN2,GAP43,VSNL1,DCX,PRKCB
Hepatic System Disease	1.74E-04-8.06E-03	F12,SPP1,PCSK9,GPC3,TFPI2
Cellular Compromise	1.92E-04-1.6E-02	ANK3,CXCL3,APOE,TNFSF11,SPP1,RND1,FBXO2,LYN,NEFM,TAC1,NEFH
Developmental Disorder	1.92E-04-1.6E-02	CA2,APOE,TNFSF11,FABP7,GAP43,DCX
Immunological Disease	1.92E-04-1.6E-02	F12,KLKB1,APOE,CD19,TNFSF11,SPP1,LYN,TUBA4A,IL27RA
Organ Development	1.92E-04-8.06E-03	TNFSF11,FABP7,GAP43
Reproductive System Development and Function	1.92E-04-1.6E-02	GNAS,TNFSF11,CCNA1,TAC1,RLN2,FABP7,SEMG1 (includes EG:6406),HSPA2
Skeletal and Muscular Disorders	1.92E-04-1.6E-02	ANK3,CA2,APOE,TNNT1,DDX25,NEFL,CA4,SLC35D3,TAC1,CXCL5,GPC3,CKB,CXCL3,RGS5,NEFM,FABP7,TNFRSF10A (includes EG:8797),FAM124A,ACTA1,SLCO4C1,RASGRP2,FAM19A4,TNFSF11,CD19,SPP1,EDNRB,DNER,MT1X,TUBA4A,NEFH,TFPI2,CXCL6,GNAS,CHST9,SYT3,LYN,C2ORF40,GAP43,VSNL1,SALL4,PRKCB
Inflammatory Disease	3.82E-04-1.6E-02	APOE,CA2,DDX25,CA4,TAC1,ARG2,CXCL5,CXCL3,CALCB (includes EG:797),RGS5,IL27RA,FAM124A,ACTA1,SLCO4C1,FAM19A4,CD19,TNFSF11,SPP1,EDNRB,DNER,TUBA4A,TFPI2,CXCL6,GNAS,CHST9,SYT3,LYN,GAP43,PRKCB,SALL4
Renal and Urological Disease	3.82E-04-1.6E-02	APOE,CA2,CD19,SPP1,EDNRB,CA4,LYN,TUBA4A,IL27RA,GPC3,PRKCB
Nucleic Acid Metabolism	4.93E-04-1.6E-02	APOE,LPAR4,EDNRB,TAC1,PYY,GNAS,CALCB (includes EG:797),CXCL3,HSPE1,NEFM,NPW,GAP43,VSNL1
Small Molecule Biochemistry	4.93E-04-1.6E-02	CA2,APOE,LPAR4,FKBP1A,TAC1,ARG2,PYY,KISS1R,CALCB (includes EG:797),CXCL3,HSPE1,NEFM,NPW,SLC16A10,CD19,TNFSF11,SPP1,EDNRB,PCSK9,ETNK1,GNAS,RBP7,LYN,GAP43,VSNL1,PPAP2C,PRKCB
Post-Translational Modification	6.33E-04-1.6E-02	F12,APOE,CD19,SPIB,SPP1,EDNRB,PCSK9,DNER,PTN,TAC1,FKBP1A,HSPE1,FBXO2,LYN,RLN2
Cell Cycle	6.96E-04-1.6E-02	APOE,CD19,SPP1,CUL4A,PTN,TAC1,FKBP1A,RPRM,HSPA2,IGFBP2,CHAF1A,CALCB (includes EG:797),GNAS,CCNA1,LYN,SOX8,PPAP2C,DCX,PRKCB,CDC25A
Connective Tissue Development and Function	7.01E-04-1.6E-02	CA2,TNFSF11,SPP1,PTN,TAC1,GNAS,CALCB (includes EG:797),WIF1,RLN2,SOX8,GAP43,PPAP2C,CDC25A
Cellular Development	9.45E-04-1.6E-02	TEAD4,CA2,TNFSF11,CD19,SPIB,SPP1,EDNRB,UPK1A,PCSK9,CUL4A,DNER,PTN,HSPA2,CXCL3,KLKB1,GNAS,CCNA1,WIF1,LYN,FABP7,SOX8,GAP43,IL27RA,PRKCB
Dermatological Diseases and Conditions	9.45E-04-1.46E-02	APOE,F12,KLKB1,CD19,TAC1,GAP43
Hematopoiesis	9.45E-04-1.6E-02	TNFSF11,SPIB,CD19,CUL4A,LYN,TAC1
Organismal Injury and Abnormalities	9.45E-04-1.6E-02	APOE,F12,CA2,CD19,SPP1,CA4,TUBA4A,NEFH,TAC1,CXCL6,IGFBP2,CALCB (includes EG:797),KLKB1,GNAS,IL27RA,PRKCB
Tissue Development	1.13E-03-1.6E-02	CA2,F12,APOE,LPAR4,TNFSF11,CD19,SPP1,RND1,TAC1,GPC3,CALCB (includes EG:797),GNAS,KLKB1,CXCL3,LYN,RLN2,GAP43,VSNL1,RASGRP2
Cardiovascular Disease	1.32E-03-1.6E-02	GNAS,CA2,APOE,EDNRB,CA4,PCSK9,PTN,PRKCB
Ophthalmic Disease	1.38E-03-8.06E-03	APOE,CA2,EDNRB,CA4
Reproductive System Disease	2.28E-03-1.6E-02	APOE,TNFSF11,SPP1,EDNRB,TUBA4A,TFPI2,IGFBP2,FAM54A,WIF1,CMTM8,FABP7,FAM124A,CDC25A,PRKCB
Organismal Survival	2.31E-03-1.1E-02	APOE,TNFSF11,NEFL,CA4,NEFH,TAC1,FKBP1A,GPC3,GNAS,CXCL3,TFAM,HSPE1,LYN,RLN2,IL27RA,SALL4,CDC25A
Cell Death	2.56E-03-1.6E-02	APOE,NEFL,CUL4A,PTN,TAC1,FKBP1A,ARG2,GPC3,PYY,CALCB (includes EG:797),CXCL3,WIF1,HSPE1,PHF17,IL27RA,TNFRSF10A (includes EG:8797),GULP1,CDC25A,CD19,TNFSF11,SPP1,EDNRB,MT1X,PCSK9,NEFH,HSPA2,KLK8,IGFBP2,GNAS,TFAM,LYN,PRKCB
Endocrine System Disorders	3.37E-03-1.46E-02	GNAS,CA2,TNFSF11,SPP1,CA4,PYY,PRKCB
Metabolic Disease	3.37E-03-1.6E-02	CA2,GNAS,APOE,SPP1,EDNRB,CA4,PCSK9,PRKCB
Organ Morphology	3.74E-03-1.58E-02	KISS1R,GNAS,EDNRB,TAC1,RLN2,GAP43,PYY,IGFBP2
Lipid Metabolism	4.73E-03-1.6E-02	KISS1R,APOE,CD19,RBP7,PCSK9,LYN,ETNK1,PPAP2C,PRKCB
Connective Tissue Disorders	6.31E-03-1.6E-02	APOE,DDX25,TAC1,CXCL5,CXCL3,RGS5,FAM124A,SLCO4C1,ACTA1,FAM19A4,CD19,TNFSF11,SPP1,EDNRB,DNER,TUBA4A,TFPI2,CXCL6,GNAS,CHST9,FBXO2,SYT3,LYN,GAP43,SALL4,PRKCB
Infectious Disease	6.31E-03-6.31E-03	CA2,CA4
Lymphoid Tissue Structure and Development	6.31E-03-8.06E-03	APOE,KLKB1,TNFSF11
Protein Synthesis	6.31E-03-6.31E-03	APOE,PCSK9
Tumor Morphology	7.17E-03-1.6E-02	APOE,GPC3,IGFBP2
Behavior	7.24E-03-7.24E-03	CALCB (includes EG:797),RLN2,NPW,PYY
Digestive System Development and Function	7.24E-03-1.6E-02	CALCB (includes EG:797),GNAS,RLN2,TAC1,NPW,PYY
Amino Acid Metabolism	8.06E-03-1.6E-02	SLC16A10,APOE,EDNRB,TAC1
Antimicrobial Response	8.06E-03-8.06E-03	HSPE1
Carbohydrate Metabolism	8.06E-03-1.6E-02	APOE,CD19,SPP1,LYN,PRKCB
DNA Replication, Recombination, and Repair	8.06E-03-1.15E-02	APOE,CALCB (includes EG:797),TNFSF11,TFAM,SPP1,TAC1,TFPI2,IGFBP2,PRKCB,CDC25A
Drug Metabolism	8.06E-03-1.6E-02	SLC16A10,FKBP1A,TAC1
Embryonic Development	8.06E-03-1.6E-02	CALCB (includes EG:797),TNFSF11,EDNRB,HSPE1,CDC25A
Hair and Skin Development and Function	8.06E-03-1.6E-02	SPP1,GAP43,CDC25A
Hematological Disease	8.06E-03-1.6E-02	APOE,CD19,TNFSF11,SPP1,RLN2,RASGRP2
Hypersensitivity Response	8.06E-03-8.06E-03	LYN
Infection Mechanism	8.06E-03-1.6E-02	CXCL3,APOE
Nutritional Disease	8.44E-03-8.44E-03	SPP1,NEFL,NEFH
Organismal Functions	1.02E-02-1.02E-02	F12,KLKB1,APOE,TAC1
Respiratory Disease	1.22E-02-1.6E-02	APOE,SPP1,EDNRB
Energy Production	1.6E-02-1.6E-02	HSPE1
Hepatic System Development and Function	1.6E-02-1.6E-02	GNAS
Organismal Development	1.6E-02-1.6E-02	TNFSF11
RNA Post-Transcriptional Modification	1.6E-02-1.6E-02	DDX25

## Sheet: S3-B2
Table S3-B2. Functional analysis of the downregulated genes in iPS-hASC designating a unique hiPSC state
Category	P-value	Molecules
Cancer	4.08E-05-4.98E-02	MALAT1,JAK1,DNAJB4,BMPR2,BCL6,VCAN,HOOK3,CAMK2D,RHOB,CST3,AKT3,SERPINE1,PURA,GABRE,CTSK,COL4A1,COL6A2,IL13RA1,COL12A1,SSTR1,NEDD4,MFAP3L,SCG2,TTC3,KITLG,MYL9 (includes EG:10398),CCNG2,TAGLN,CALD1,CAPN2,SGPP1,MXRA5,S100A11,MIR21 (includes EG:406991)
Dermatological Diseases and Conditions	6.3E-05-3.76E-02	KITLG,COL5A2,COL4A1,COL6A2,CST3,COL12A1,S100A11
Cellular Growth and Proliferation	1.21E-04-4.98E-02	COL4A1,JAK1,IL13RA1,DNAJB4,BMPR2,SSTR1,MYOF,BCL6,VCAN,SCG2,MYL9 (includes EG:10398),KITLG,CCNG2,CAMK2D,RHOB,CST3,AKT3,CAPN2,NFIB,PURA,SERPINE1,S100A11,MIR21 (includes EG:406991)
Connective Tissue Disorders	2.3E-04-2.52E-02	CTSK,COL5A2,COL4A1,COL6A2,COL12A1,BCL6,NEDD4,RHOB,TPP1,CALD1,AKT3,SERPINE1,POLK
Genetic Disorder	2.3E-04-4.57E-02	MALAT1,DNAJB4,GRAMD3,BNC2,BMPR2,BCL6,VCAN,USP3,SLC22A15,CAMK2D,RHOB,CST3,AKT3,MYO1D,SULF2,GABRE,SERPINE1,ULK2,CTSK,COL5A2,COL4A1,NHEDC2,COL6A2,RHOBTB3,COL12A1,SSTR1,MYOF,NEDD4,SCG2,TTC3,KITLG,MYL9 (includes EG:10398),CAP2,CD99L2,TAGLN,TPP1,CALD1,HGSNAT,MXRA5,S100A11,PTER,MIR21 (includes EG:406991)
Cellular Movement	2.63E-04-4.98E-02	JAK1,COL4A1,DNAJB4,VCAN,SCG2,KITLG,RHOB,CD99L2,TAGLN,AKT3,CALD1,SGPP1,CAPN2,SERPINE1
Neurological Disease	2.63E-04-4.08E-02	COL4A1,IL13RA1,BNC2,BCL6,VCAN,TTC3,KITLG,CAMK2D,CST3,CD99L2,AKT3,NFIB,MYO1D,GABRE,MXRA5,SERPINE1,MIR21 (includes EG:406991),ULK2
Respiratory Disease	4.79E-04-4.98E-02	KITLG,MALAT1,RHOB,DNAJB4,BMPR2,SSTR1,AKT3,SERPINE1
Cell Cycle	4.88E-04-4.57E-02	KITLG,CCNG2,CAMK2D,RHOB,DNAJB4,SSTR1,CAPN2,BCL6,POLK,PURA
Protein Degradation	4.97E-04-1.69E-02	USP3,CTSK,TPP1,CAPN2,SERPINE1,FBXL4,NEDD4
Cardiovascular System Development and Function	1.16E-03-4.98E-02	KITLG,COL4A1,CAMK2D,RHOB,CST3,BMPR2,AKT3,SERPINE1,SCG2
Tumor Morphology	1.16E-03-4.98E-02	KITLG,COL4A1,RHOB,CST3,BCL6,SERPINE1
Gene Expression	2.04E-03-4.98E-02	KITLG,JAK1,CRTC3,RHOB,TAGLN,BMPR2,TRIM38,NFIB,PURA,BCL6
Immune Cell Trafficking	2.11E-03-4.98E-02	KITLG,COL4A1,JAK1,RHOB,CD99L2,SERPINE1,SCG2
Reproductive System Disease	2.63E-03-4.57E-02	MALAT1,JAK1,BMPR2,SSTR1,BCL6,VCAN,MFAP3L,MYL9 (includes EG:10398),KITLG,CAMK2D,CYB5R3,AKT3,SGPP1,MXRA5,SERPINE1
Cellular Compromise	3.53E-03-3.76E-02	USP3,KITLG,NIN,HOOK3,CTSK,SERPINE1
Cellular Function and Maintenance	3.87E-03-2.95E-02	KITLG,NIN,COL5A2,CAMK2D,RHOB,CST3,BCL6,SERPINE1,NEDD4
Cellular Assembly and Organization	4.01E-03-4.98E-02	COL5A2,CTSK,BCL6,VCAN,KITLG,NIN,CCNG2,HOOK3,CAMK2D,CAP2,RHOB,CST3,CYB5R3,TAGLN,CALD1,AKT3,CAPN2,NFIB,PURA,SERPINE1,RNF19A,ULK2
Cardiovascular Disease	4.24E-03-4.73E-02	COL5A2,COL4A1,COL12A1,SSTR1,BMPR2,MYOF,BCL6,VCAN,KITLG,USP3,CAMK2D,CST3,AKT3,MYO1D,GABRE,SERPINE1,MIR21 (includes EG:406991),PTER
Cell Death	4.24E-03-4.97E-02	JAK1,BCL6,VCAN,SCG2,KITLG,CAMK2D,RHOB,CST3,CYB5R3,TPP1,AKT3,SGPP1,PURA,SERPINE1,POLK,S100A11,RNF19A
Cell Morphology	4.24E-03-4.98E-02	KITLG,RHOB,CALD1,AKT3,POLK,PURA,SERPINE1,BCL6,NEDD4,ULK2
Cell-To-Cell Signaling and Interaction	4.24E-03-4.98E-02	KITLG,RHOB,IL13RA1,CD99L2,CALD1,CAPN2,SERPINE1,MIR21 (includes EG:406991),VCAN
Cellular Development	4.24E-03-4.98E-02	KITLG,COL4A1,CAMK2D,RHOB,AKT3,BCL6,SERPINE1,S100A11,VCAN
Connective Tissue Development and Function	4.24E-03-4.98E-02	KITLG,CTSK,RHOB,TPP1,CALD1,CAPN2,SERPINE1,POLK,PURA,VCAN
Developmental Disorder	4.24E-03-4.57E-02	KITLG,CTSK,SSTR1,NFIB
Drug Metabolism	4.24E-03-4.16E-02	KITLG,CYB5R3,SULF2
Embryonic Development	4.24E-03-2.93E-02	KITLG,CTSK,JAK1,COL4A1,TPP1,BMPR2,POLK,NEDD4,VCAN
Hair and Skin Development and Function	4.24E-03-3.93E-02	KITLG,CCNG2
Hematological Disease	4.24E-03-4.57E-02	KITLG,CCNG2,COL4A1,JAK1,SSTR1,BMPR2,CALD1,AKT3,CAPN2,SERPINE1,BCL6
Hematological System Development and Function	4.24E-03-4.98E-02	KITLG,COL4A1,RHOB,IL13RA1,CD99L2,SERPINE1,PURA,BCL6
Hematopoiesis	4.24E-03-4.98E-02	KITLG,BCL6
Immunological Disease	4.24E-03-4.16E-02	KITLG,JAK1,BCL6
Inflammatory Response	4.24E-03-4.33E-02	KITLG,RHOB,CD99L2,SERPINE1
Lipid Metabolism	4.24E-03-4.16E-02	KITLG,CYB5R3,SGPP1
Molecular Transport	4.24E-03-3.76E-02	KITLG,AKT3,SGPP1
Nervous System Development and Function	4.24E-03-1.69E-02	CST3,PURA,ULK2
Ophthalmic Disease	4.24E-03-4.24E-03	VCAN
Organ Development	4.24E-03-1.69E-02	KITLG,CST3,SERPINE1
Organismal Development	4.24E-03-3.35E-02	KITLG,JAK1,NEDD4,SCG2
Organismal Injury and Abnormalities	4.24E-03-2.93E-02	KITLG,BMPR2,SERPINE1
Reproductive System Development and Function	4.24E-03-4.57E-02	KITLG,CCNG2,JAK1,CD99L2,SSTR1
Skeletal and Muscular Disorders	4.24E-03-4.84E-02	KITLG,COL5A2,CTSK,CAMK2D,COL6A2,AKT3,CALD1,BCL6,SERPINE1
Skeletal and Muscular System Development and Function	4.24E-03-4.98E-02	CTSK,BMPR2,BCL6,MYOF,SCG2,KITLG,MYL9 (includes EG:10398),CAMK2D,AKT3,CALD1,TPP1,CAPN2,SERPINE1,SULF2
Small Molecule Biochemistry	4.24E-03-4.63E-02	KITLG,JAK1,CYB5R3,SGPP1,SULF2,VCAN
Tissue Development	4.24E-03-4.43E-02	KITLG,CTSK,COL4A1,RHOB,TPP1,BMPR2,SERPINE1,MYOF
Visual System Development and Function	4.24E-03-4.24E-03	SERPINE1
Organismal Survival	7.13E-03-3.76E-02	BCL6,SERPINE1
Antigen Presentation	8.47E-03-2.52E-02	KITLG,RHOB
Cell-mediated Immune Response	8.47E-03-4.16E-02	KITLG,COL4A1,BCL6
DNA Replication, Recombination, and Repair	8.47E-03-1.27E-02	AKT3,POLK
Endocrine System Disorders	8.47E-03-4.57E-02	CST3,SSTR1
Gastrointestinal Disease	8.47E-03-4.43E-02	CST3,BMPR2,SSTR1
Humoral Immune Response	8.47E-03-4.94E-02	KITLG,IL13RA1,BCL6
Hypersensitivity Response	8.47E-03-4.98E-02	KITLG
Infection Mechanism	8.47E-03-3.76E-02	CRTC3,NEDD4
Lymphoid Tissue Structure and Development	8.47E-03-3.35E-02	KITLG,AKT3,SERPINE1
Organ Morphology	8.47E-03-4.98E-02	CAMK2D,AKT3,SERPINE1
Renal and Urological Disease	8.47E-03-3.35E-02	CST3,CALD1,SERPINE1
Tissue Morphology	8.47E-03-4.57E-02	KITLG,MYL9 (includes EG:10398),CTSK,COL4A1,CAMK2D,TPP1,BMPR2,CALD1,SERPINE1,MYOF
Amino Acid Metabolism	1.27E-02-4.63E-02	KITLG,JAK1,VCAN
Endocrine System Development and Function	1.27E-02-3.35E-02	KITLG,CST3,CYB5R3
Inflammatory Disease	1.27E-02-4.16E-02	CALD1,BCL6,SERPINE1
Behavior	1.69E-02-4.16E-02	JAK1
Cell Signaling	1.69E-02-4.16E-02	KITLG,JAK1,RHOB,BMPR2,BCL6,NEDD4
Digestive System Development and Function	1.69E-02-4.16E-02	JAK1,RHOB
Metabolic Disease	1.69E-02-1.69E-02	HGSNAT
Infectious Disease	2.1E-02-2.52E-02	CALD1,SERPINE1
Carbohydrate Metabolism	4.16E-02-4.16E-02	SULF2
Organismal Functions	4.16E-02-4.16E-02	SERPINE1
Renal and Urological System Development and Function	4.57E-02-4.57E-02	BCL6
Post-Translational Modification	4.63E-02-4.63E-02	KITLG,JAK1

## Sheet: S3-C1
Table S3-C1. Functional analysis of the upregulated genes in iPS-hNFib designating a unique hiPSC state
Category	P-value	Molecules
Cancer	1.56E-04-4.95E-02	CA2,PPIH,ARID1A,COL4A6,NLRP7,NUF2,DMD,FAM54A,CD1D,FGFR3,HTR2C,FGF4,CD52,SERPINB9,CCDC88A,NEK2,NPTX2,DIAPH2,ITGB3BP,PIK3C2B,STIL,SPP1,ABCG2,SPC25,PTCH1,TUBD1,FUBP1,MBD2,CNTNAP2,TPD52,BST2,MFAP3L,KLKB1,MAD2L1,BCL11A,DLK1,PELI1,ATP1A2,NP,FBXO5,AK2,SFN,DCX
Cell Cycle	1.56E-04-4.98E-02	STIL,ARID1A,SPP1,SPC25,RPRM,FUBP1,NUF2,MAD2L1,FGF4,NEK2,FBXO5,DIAPH2,SFN,DCX,NUCKS1
Reproductive System Disease	1.56E-04-4.95E-02	PIK3C2B,STIL,SPP1,ABCG2,SPC25,TUBD1,NUF2,MFAP3L,FGFR3,FGF4,MAD2L1,CCDC88A,SERPINB9,NEK2,DIAPH2,FBXO5,AK2,DCX,ITGB3BP
Cell Death	1.72E-04-3.75E-02	MAD2L1,SPP1,DLK1,NP,NEFH,EOMES,SFN,RBP1,ITGB3BP,CD1D
Organismal Development	8.26E-04-4.49E-02	FGF4,LRP4,HTR2C,DLK1,SP8,ATP1A2,PTCH1,NP,PRKAA2,CHST11
Skeletal and Muscular System Development and Function	8.26E-04-4.07E-02	FGFR3,FGF4,LRP4,SPP1,F2RL1,DLK1,SP8,PTCH1,CHST11,DMD
Genetic Disorder	8.47E-04-4.88E-02	LRP4,PPIH,MCM8,RIT2,NRK,MPP6,FGFR3,AJAP1 (includes EG:55966),DIAPH2,CHST11,NLRP2,SLCO4C1,CACHD1,SUSD3,STIL,SPP1,TSPAN18,GAS5,MDN1 (includes EG:23195),UPF3B,PTCH1,NEFH,FRMD4B,TPD52,CNTNAP2,MBD2,BST2,COL4A5,KLKB1,ZNF322A,DLK1,NP,SLC44A5,YEATS4,CTCFL,CA2,COL4A6,DEPDC1,DYNC1I1,TIMM8A,DMD,NUF2,FAM54A,CD1D,HTR2C,CD52,PTCHD1,NEK2,F2RL1,BRWD3,SP8,ASRGL1,PRKAA2,HS6ST2,APOO,MLLT11,GRHL3,ABCG2,SPC25,SALL1,T…
Renal and Urological Disease	8.47E-04-4.49E-02	FGFR3,COL4A5,CA2,SPP1,COL4A6,PTCH1,SALL1,TUBD1
Cell Morphology	1.18E-03-4.49E-02	FGF4,MAD2L1,NEK2,SPP1,F2RL1,DLK1,NEFH,SFN,DCX
Cellular Compromise	1.18E-03-3.75E-02	MAD2L1,SPP1,NEK2,F2RL1,TIMM8A,NEFH,EOMES,SFN,BST2,SIP1
Hematological Disease	1.18E-03-3.22E-02	FGF4,CD52,SPP1,NP,EOMES,BST2,CD1D
Embryonic Development	2E-03-4.61E-02	FGFR3,LRP4,FGF4,STIL,GRHL3,F2RL1,SP8,ABCG2,PTCH1,FBXO5,SALL1,EOMES
Tissue Development	2E-03-4.61E-02	CA2,STIL,GRHL3,SPP1,PTCH1,SALL1,EOMES,DMD,FGFR3,FGF4,F2RL1,SP8,CHST11,PCDH8
Gastrointestinal Disease	2.51E-03-3.02E-02	CA2,PPIH,SPP1,SPC25,TUBD1,CNTNAP2,DMD,BST2,FGFR3,MAD2L1,NEK2,NPTX2,SFN
Cell-To-Cell Signaling and Interaction	3.03E-03-3.02E-02	SPP1,ARID1A,ABCG2,PARD6B,NEFH,DMD,SIP1,CD1D,FGF4,MAD2L1,KLKB1,F2RL1,PCDH8
Cell-mediated Immune Response	3.03E-03-4.49E-02	SPP1,DLK1,NP,EOMES,CD1D
Hematological System Development and Function	3.03E-03-3.02E-02	KLKB1,MAD2L1,FGF4,SPP1,F2RL1,DLK1,ABCG2,CD1D
Immune Cell Trafficking	3.03E-03-2.27E-02	KLKB1,SPP1,F2RL1,CD1D
Cellular Assembly and Organization	4.25E-03-4.98E-02	SPP1,SEMA6A,SPC25,EFHD1,PARD6B,NEFH,NUF2,DMD,FGF4,MAD2L1,CCDC88A,NEK2,F2RL1,DIAPH2,FBXO5,PCDH8,SFN,DCX
DNA Replication, Recombination, and Repair	4.25E-03-4.98E-02	MAD2L1,NEK2,SPC25,PTCH1,FBXO5,MBD2,SFN,NUF2
Neurological Disease	4.25E-03-4.49E-02	CA2,ARID1A,PTCH1,UPF3B,NEFH,SIP1,FGFR3,HTR2C,F2RL1,BRWD3,DLK1,SP8,ATP1A2,PRKAA2,DCX
Antimicrobial Response	7.62E-03-7.62E-03	CD1D
Auditory Disease	7.62E-03-7.62E-03	SALL1
Cardiovascular System Development and Function	7.62E-03-4.49E-02	FGF4,HTR2C,SPP1,F2RL1,ATP1A2
Cellular Development	7.62E-03-4.49E-02	FGFR3,FGF4,SPP1,ABCG2,SFN,CD1D
Cellular Function and Maintenance	7.62E-03-3.75E-02	CA2,FGF4,NEK2,ABCG2,SEMA6A,PRKAA2,FBXO5,NEFH,PARD6B,DCX,CD1D
Cellular Growth and Proliferation	7.62E-03-4.87E-02	FGFR3,MAD2L1,FGF4,SPP1,NEK2,DLK1,PTCH1,HS6ST2,CD1D
Cellular Response to Therapeutics	7.62E-03-3.02E-02	ABCG2
Connective Tissue Development and Function	7.62E-03-4.07E-02	FGFR3,MAD2L1,FGF4,SPP1,DLK1,CHST11
Dermatological Diseases and Conditions	7.62E-03-4.49E-02	KLKB1,CD52,SPP1,PTCH1,TUBD1,SFN,CD1D
Developmental Disorder	7.62E-03-4.96E-02	FGFR3,CA2,BRWD3,DLK1,SP8,UPF3B,SALL1,DMD,DCX
Digestive System Development and Function	7.62E-03-3.75E-02	F2RL1
Drug Metabolism	7.62E-03-4.49E-02	F2RL1,SULT1A1,ABCG2,SFN
Endocrine System Development and Function	7.62E-03-4.49E-02	SPP1,ABCG2,SULT1A1,SFN
Energy Production	7.62E-03-7.62E-03	ABCG2
Hair and Skin Development and Function	7.62E-03-3.02E-02	MAD2L1,SPP1,CD1D
Hematopoiesis	7.62E-03-3.02E-02	MAD2L1,FGF4,SPP1,DLK1,CD1D
Hepatic System Disease	7.62E-03-1.52E-02	NEK2,SPP1
Immunological Disease	7.62E-03-4.49E-02	FGF4,KLKB1,SPP1,EOMES,BST2,CD1D
Lipid Metabolism	7.62E-03-4.49E-02	PIK3C2B,SULT1A1,ABCG2,ST3GAL6,SFN,RBP1,CD1D
Lymphoid Tissue Structure and Development	7.62E-03-2.27E-02	DLK1,EOMES
Metabolic Disease	7.62E-03-3.89E-02	CA2,SPP1,DLK1,CTH
Molecular Transport	7.62E-03-3.75E-02	CA2,F2RL1,ABCG2,ATP1A2,NP
Nervous System Development and Function	7.62E-03-4.51E-02	FGFR3,EFHD1,PARD6B,NEFH,PCDH8,DMD,DCX
Nucleic Acid Metabolism	7.62E-03-2.27E-02	ABCG2,NP,AK2
Ophthalmic Disease	7.62E-03-7.62E-03	DLK1
Organ Development	7.62E-03-3.75E-02	FGFR3,FGF4,SALL1,RBP1
Organ Morphology	7.62E-03-4.49E-02	FGF4,SPP1,F2RL1,NP,RBP1
Organismal Injury and Abnormalities	7.62E-03-4.49E-02	FGFR3,HTR2C,CA2,KLKB1,SPP1,F2RL1,ATP1A2,NEFH,DMD
Protein Trafficking	7.62E-03-7.62E-03	PPIH
Reproductive System Development and Function	7.62E-03-2.27E-02	MAD2L1,FGF4,RBP1
Respiratory Disease	7.62E-03-1.52E-02	F2RL1
Respiratory System Development and Function	7.62E-03-3.75E-02	FGFR3,F2RL1,ATP1A2,RBP1
Skeletal and Muscular Disorders	7.62E-03-4.49E-02	FGFR3,FGF4,CA2,HTR2C,SPP1,PTCH1,NEFH,FUBP1,TUBD1,DMD
Small Molecule Biochemistry	7.62E-03-4.49E-02	CA2,PIK3C2B,ABCG2,ST3GAL6,RBP1,CD1D,SULT1A1,ATP1A2,NP,CHST11,CTH,AK2,SFN
Tissue Morphology	7.62E-03-4.49E-02	MAD2L1,FGF4,SPP1,F2RL1,DLK1,SP8
Vitamin and Mineral Metabolism	7.62E-03-7.62E-03	RBP1
Inflammatory Response	1.13E-02-3.75E-02	KLKB1,SPP1,F2RL1
Amino Acid Metabolism	1.52E-02-3.02E-02	CTH
Carbohydrate Metabolism	1.52E-02-4.51E-02	PPP1R3B,PIK3C2B,ABCG2,PRKAA2,CHST11
Cell Signaling	1.52E-02-4.49E-02	NP,NRK
Cellular Movement	1.52E-02-3.75E-02	PIK3C2B,CCDC88A,SPP1
Connective Tissue Disorders	1.52E-02-1.52E-02	SPP1
Gene Expression	1.52E-02-4.49E-02	MBD2
Inflammatory Disease	1.52E-02-3.02E-02	SPP1
Renal and Urological System Development and Function	1.52E-02-3.75E-02	SPP1,ABCG2,SALL1
Tumor Morphology	1.52E-02-4.49E-02	FGF4,SPP1,DLK1,PTCH1
Cardiovascular Disease	2.18E-02-3.89E-02	CA2,SPP1,DLK1,PTCH1,DMD
Post-Translational Modification	2.27E-02-3.02E-02	ST3GAL6
Behavior	3.02E-02-3.02E-02	STRBP
Infection Mechanism	3.02E-02-3.02E-02	BST2
RNA Damage and Repair	3.02E-02-3.02E-02	UPF3B
Endocrine System Disorders	3.39E-02-3.39E-02	NEK2,DIAPH2
Hepatic System Development and Function	3.75E-02-3.75E-02	SPP1
Hypersensitivity Response	3.75E-02-3.75E-02	F2RL1
Nutritional Disease	3.75E-02-3.99E-02	HTR2C,SPP1,NEFH
Psychological Disorders	3.89E-02-3.89E-02	CA2,HTR2C
Visual System Development and Function	4.49E-02-4.49E-02	FGF4

## Sheet: S3-C2
Table S3-C2. Functional analysis of the downregulated genes in iPS-hNFib designating a unique hiPSC state
Category	P-value	Molecules
Connective Tissue Disorders	5.03E-09-1.1E-02	MME,ADM,IGFBP4,SULF1,COL14A1,BDNF,MMP14,ANTXR1,TAP1,FAS,ATP8B1,C1R,ATP10D,FBLN1,NAV3,MMP11,ENPP2,SPOCK1,ADAMTS5,PTGER4,ITGA4,PSMB9,COL5A2,FRY,COL6A2,ADAMTS1,THBS1,C1S,COL12A1,IL15,TFPI2,STXBP6,CXCL6,COL1A1,COL21A1,RND3,MATN2,HLA-E,CDKN1A,CALD1,PLEKHA2,CFLAR,CXCL2
Genetic Disorder	5.03E-09-1.1E-02	MALAT1,GLT8D2,COL14A1,EPS8,RCAN2,ATP8B1,MYLK,OXR1,FBLN1,RFTN1,SPOCK1,SERPINE1,GNG12,GUCY1B3,ITGA4,NHEDC2,GGCX,TFPI2,RUNX1T1,REEP3,CRYBG3,CFLAR,PDGFD,ADM,MME,CLDN11,BDNF,CKAP4,MAP3K5 (includes EG:4217),TAP1,C1R,LIPA,SEC61A1,ATP10D,TTC39C,NAV3,MYO1D,RPS6KA2,FABP3,ROBO2,VEPH1,PSMB9,DMPK,TXNIP,COL12A1,IL15,STXBP6,CXCL6,LAMB2,FAM114A1,RBMS3,CDKN1A,LBH,EHBP1,QPCT (includes EG:25797),AKR1C3,CYP2U1,SCUBE…
Cancer	1.01E-07-1.1E-02	MALAT1,JAK1,EPS8,AKR1C3,RCAN2,SCUBE2,DNAJC15,ATP8B1,MYLK,TGFBR2,NAAA,COMT,FBLN1,SERPINE1,TSPAN4,PRKD1,ITGA4,IGFBP6,P4HB,ADAMTS1,THBS1,C1S,TFPI2,TTC3,RUNX1T1,ARHGAP18,RND3,CFLAR,PDGFD,PTPN21,CD151,MME,ADM,IGFBP4,SULF1,CLDN11,FBXL7,BDNF,PPP1R3C,MMP14,ANTXR1,CRYL1,MAP3K5 (includes EG:4217),PDGFC,FAS,C1R,HMOX1,ZMAT3,SDC2,LAMP1,NAV3,ENPP2,MMP11,FABP3,PTGER4,PSMB9,FRY,COL6A2,TXNIP,COL12A1,IL15,ITGA2,SL…
Cardiovascular System Development and Function	1.81E-07-1.1E-02	MME,ADM,ADAMTS1,THBS1,BDNF,MMP14,IL15,ITGA2,MAP3K5 (includes EG:4217),FAS,CXCL6,TGFBR2,HMOX1,COL1A1,SDC2,CAT,MMP11,ENPP2,SERPINE1,GUCY1B3,PTGER4,ITGA4,CD151
Cellular Growth and Proliferation	1.81E-07-1.1E-02	ADM,IGFBP4,COL14A1,CLDN11,EPS8,JAK1,AKR1C3,BDNF,MMP14,PDGFC,FAS,ZMYND11,GPNMB,TGFBR2,LIPA,HMOX1,SDC2,COMT,ENPP2,MMP11,FABP3,SPOCK1,SERPINE1,GUCY1B3,PTGER4,PRKD1,IGFBP6,TSPAN5,ADAMTS1,APPL2,TXNIP,THBS1,ITGA2,IL15,TFPI2,COL1A1,RUNX1T1,HLA-E,CDKN1A,CAT,LIMA1,CFLAR,CXCL2,PDGFD
Gastrointestinal Disease	1.11E-06-1.1E-02	MME,IGFBP4,EPS8,AKR1C3,BDNF,ANTXR1,CRYL1,PDGFC,FAS,MYLK,TGFBR2,C1R,HMOX1,NAAA,SDC2,ENPP2,MMP11,FABP3,SERPINE1,PTGER4,P4HB,FRY,COL6A2,ADAMTS1,TXNIP,C1S,IL15,STXBP6,TTC3,COL1A1,P4HA1,ARHGAP18,HLA-E,CDKN1A,CALD1,KIAA1199,PTPN21,QPCT (includes EG:25797)
Cellular Movement	3.57E-06-1.1E-02	ADM,MME,SULF1,IGFBP4,CLDN11,EPS8,JAK1,BDNF,MMP14,MAP3K5 (includes EG:4217),NEXN,FAS,TGFBR2,MYLK,SDC2,FBLN1,ENPP2,ROBO2,SPOCK1,SERPINE1,PRKD1,GUCY1B3,GNG12,PTGER4,ITGA4,IGFBP6,THBS1,ITGA2,IL15,NFKBIZ,TFPI2,CXCL6,COL1A1,RND3,CAT,CDKN1A,CALD1,PDGFD,CXCL2,ADAM9,CD151
Dermatological Diseases and Conditions	1.93E-05-1.1E-02	COL14A1,COL5A2,COL6A2,THBS1,COL12A1,C1S,IL15,NFKBIZ,FAS,TGFBR2,C1R,COL1A1,COL21A1,RND3,CAT,CDKN1A,CFLAR,CXCL2,ITGA4
Inflammatory Disease	2.69E-05-1.1E-02	EPS8,SLC41A2,ATP8B1,MYLK,TGFBR2,FBLN1,SPOCK1,SERPINE1,ADAMTS5,GNG12,ITGA4,ADAMTS1,THBS1,C1S,TFPI2,ARHGAP18,MATN2,REEP3,CFLAR,ADM,MME,SULF1,IGFBP4,BDNF,MMP14,ANTXR1,MAP3K5 (includes EG:4217),TAP1,FAS,C1R,HMOX1,ATP10D,NAV3,ENPP2,FABP3,PTGER4,PSMB9,FRY,LMO7,IL15,NFKBIZ,STXBP6,CXCL6,AK5,FAM114A1,HLA-E,RBMS3,CDKN1A,CAT,CALD1,PLEKHA2,CXCL2,QPCT (includes EG:25797)
Reproductive System Disease	4.85E-05-1.1E-02	MALAT1,ADM,SULF1,IGFBP4,JAK1,MMP14,MAP3K5 (includes EG:4217),DNAJC15,FAS,ATP8B1,TGFBR2,FOXL2,SDC2,FBLN1,MMP11,ROBO2,TSPAN4,GUCY1B3,PTGER4,PRKD1,ITGA4,COL6A2,TXNIP,THBS1,C1S,IL15,ITGA2,TFPI2,STXBP6,P4HA1,CDKN1A,CFLAR,KIAA1199,PDGFD,ELL2
Immunological Disease	4.94E-05-1.1E-02	COL14A1,EPS8,JAK1,RCAN2,DOCK5,ATP8B1,MYLK,TGFBR2,RFTN1,SPOCK1,ADAMTS5,ITGA4,P4HB,THBS1,C1S,TTC3,RUNX1T1,ARHGAP18,MATN2,CRYBG3,CFLAR,ELL2,ADM,MME,SULF1,IGFBP4,BDNF,ANTXR1,TAP1,FAS,C1R,HMOX1,ATP10D,NAV3,ENPP2,MYO1D,RPS6KA2,PTGER4,PSMB9,FRY,LMO7,TXNIP,ITGA2,IL15,NFKBIZ,STXBP6,CXCL6,AK5,HLA-E,CAT,CDKN1A,CALD1,PLEKHA2,CXCL2
Cardiovascular Disease	6.36E-05-1.1E-02	ADM,BDNF,TXNIP,RCAN2,ITGA2,MAP3K5 (includes EG:4217),PDGFC,FAS,TGFBR2,HMOX1,COL1A1,CAT,CDKN1A,CFLAR,FABP3,SERPINE1,ITGA4
Cell Death	6.36E-05-1.1E-02	MME,ADM,IGFBP4,SULF1,JAK1,BDNF,MMP14,RCAN2,ANTXR1,MAP3K5 (includes EG:4217),DNAJC15,ZMYND11,FAS,SSPN,MYLK,TGFBR2,HMOX1,FOXL2,ZMAT3,SDC2,FBLN1,LAMP1,MMP11,RPS6KA2,SERPINE1,PRKD1,PTGER4,ITGA4,IGFBP6,P4HB,THBS1,TXNIP,IL15,ITGA2,NFKBIZ,LAMB2,RUNX1T1,RND3,RASSF2,CDKN1A,CAT,CFLAR,CXCL2
Tumor Morphology	9.26E-05-1.1E-02	MME,THBS1,TXNIP,MMP14,ITGA2,PDGFC,CXCL6,FAS,TGFBR2,ENPP2,SERPINE1,CXCL2,ADAM9,ITGA4,CD151
Developmental Disorder	1.16E-04-1.1E-02	ADM,HMOX1,FOXL2,CDKN1A,RCAN2,MAP3K5 (includes EG:4217),FABP3,PDGFC
Organ Morphology	1.16E-04-1.1E-02	ADM,HMOX1,ADAMTS1,BDNF,RCAN2,IL15,CDKN1A,MAP3K5 (includes EG:4217),FABP3,PDGFC
Cellular Development	1.2E-04-1.1E-02	BDNF,THBS1,IL15,ANTXR1,ITGA2,CDC42EP2,FAS,LIPA,FOXL2,RND3,ROBO2,CXCL2,GNG12,ITGA4,CD151
Tissue Morphology	1.2E-04-1.1E-02	THBS1,BDNF,IL15,MAP3K5 (includes EG:4217),TAP1,PDGFC,FAS,TGFBR2,LIPA,HMOX1,CDKN1A,SERPINE1,PTGER4,GUCY1B3,ITGA4
Cell-To-Cell Signaling and Interaction	1.21E-04-1.1E-02	ADM,MME,SULF1,CLDN11,BDNF,MMP14,PDGFC,FAS,SSPN,GPNMB,TGFBR2,SDC2,ROBO2,SPOCK1,SERPINE1,GNG12,ITGA4,RGMB,TSPAN5,LMO7,THBS1,ITGA2,IL15,LAMB2,RND3,CDKN1A,CALD1,CXCL2,PDGFD,ADAM9,CD151
Tissue Development	1.21E-04-1.1E-02	MME,COL14A1,CLDN11,BDNF,MMP14,MAP3K5 (includes EG:4217),PDGFC,FAS,GPNMB,SSPN,TGFBR2,SDC2,ENPP2,ROBO2,SPOCK1,SERPINE1,PRKD1,GUCY1B3,PTGER4,ITGA4,RGMB,TSPAN5,ADAMTS1,LMO7,THBS1,IL15,ITGA2,RND3,CAT,CDKN1A,CXCL2,ADAM9,CD151
Renal and Urological Disease	1.83E-04-1.1E-02	ADM,THBS1,MMP14,FAS,LAMB2,HMOX1,CDKN1A,FBLN1,CALD1,MMP11,ROBO2,SERPINE1,ITGA4,CD151
Nervous System Development and Function	2.67E-04-1.1E-02	LAMB2,CLDN11,SDC2,THBS1,BDNF,COMT,CDKN1A,CAT,ROBO2,CXCL2,TAP1,ITGA4
Cell Morphology	2.83E-04-1.1E-02	ADM,SULF1,BDNF,ANTXR1,CDC42EP2,FAS,MYLK,TGFBR2,HMOX1,LIPA,ROBO2,SERPINE1,PRKD1,GNG12,PTGER4,ITGA4,THBS1,ITGA2,COL1A1,RND3,LIMA1,CDKN1A,CALD1,CXCL2,SYTL2,CD151
Renal and Urological System Development and Function	3.09E-04-1.1E-02	ADM,ADAMTS1,RND3,BDNF,THBS1,MMP14,CAT,FBLN1,ANTXR1,ROBO2,FAS
Amino Acid Metabolism	3.58E-04-1.1E-02	MYLK,P4HA1,P4HB,JAK1,COMT,PDGFD,PDGFC
Cell Cycle	3.58E-04-1.1E-02	COL1A1,TXNIP,THBS1,ITGA2,IL15,CDKN1A,FAS
Connective Tissue Development and Function	3.58E-04-1.1E-02	IGFBP4,COL14A1,THBS1,TXNIP,BDNF,MMP14,PDGFC,FAS,TGFBR2,COL1A1,CDKN1A,CALD1,ENPP2,SERPINE1,GNG12,CD151
Post-Translational Modification	3.58E-04-3.38E-03	MYLK,P4HA1,P4HB,JAK1,PDGFD,PDGFC
Skeletal and Muscular Disorders	3.58E-04-1.1E-02	SCUBE2,ATP8B1,OXR1,COMT,SPOCK1,SERPINE1,ADAMTS5,GUCY1B3,ITGA4,ADAMTS1,THBS1,C1S,TFPI2,LMCD1,MATN2,CFLAR,ADM,MME,SULF1,IGFBP4,BDNF,MMP14,ANTXR1,CKAP4,MAP3K5 (includes EG:4217),TAP1,FAS,C1R,SCARB2,HMOX1,SDC2,ATP10D,LAMP1,NAV3,ENPP2,FABP3,PTGER4,PSMB9,COL5A2,FRY,COL6A2,DMPK,TXNIP,IL15,STXBP6,CXCL6,P4HA1,COL1A1,AK5,HLA-E,CAT,CDKN1A,CALD1,PLEKHA2,KIAA1199,CXCL2
Skeletal and Muscular System Development and Function	3.58E-04-1.1E-02	ADM,IGFBP4,IGFBP6,JAK1,TXNIP,THBS1,MMP14,ITGA2,IL15,PDGFC,LAMB2,TGFBR2,COMT,CDKN1A,CALD1,PDGFD,SERPINE1,PTGER4
Small Molecule Biochemistry	3.58E-04-1.1E-02	ADM,P4HB,JAK1,AKR1C3,BDNF,THBS1,CYP2U1,PDGFC,FAS,MYLK,TGFBR2,LIPA,P4HA1,HMOX1,NAAA,AK5,COMT,CAT,LSS,FABP3,SERPINE1,PDGFD,PTGER4,GUCY1B3
Embryonic Development	5.06E-04-1.1E-02	ADAMTS1,TXNIP,BDNF,THBS1,MMP14,CAT,ITGA2,ENPP2,ROBO2,SERPINE1,PTGER4
Hematological System Development and Function	5.55E-04-1.1E-02	BDNF,THBS1,MMP14,IL15,ITGA2,MAP3K5 (includes EG:4217),PDGFC,TAP1,FAS,CXCL6,MYLK,TGFBR2,COL1A1,HLA-E,CXCL2,CD151,ITGA4
Immune Cell Trafficking	5.55E-04-1.1E-02	JAK1,THBS1,MMP14,ITGA2,IL15,MAP3K5 (includes EG:4217),CXCL6,FAS,MYLK,TGFBR2,COL1A1,SERPINE1,CXCL2,ITGA4,CD151
Cellular Compromise	8.59E-04-1.1E-02	HMOX1,THBS1,BDNF,LIMA1,ITGA2,CAT,FAS,ITGA4
Cellular Assembly and Organization	9.09E-04-1.1E-02	BDNF,THBS1,MMP14,TAP1,FAS,LAMB2,RND3,SDC2,LIMA1,CALD1,SYTL2,GNG12,ITGA4
Neurological Disease	1.1E-03-1.1E-02	MME,HMOX1,P4HB,BDNF,IL15,CAT,CDKN1A,LAMP1,CFLAR,CXCL2,FAS
Hematological Disease	1.11E-03-1.1E-02	JAK1,BDNF,RCAN2,NEXN,FAS,TGFBR2,HMOX1,STEAP2,COMT,FBLN1,LAMP1,SERPINE1,PTGER4,ITGA4,P4HB,THBS1,ITGA2,IL15,GGCX,RUNX1T1,CDKN1A,CAT,CALD1,CFLAR,CXCL2,ADAM9,CD151
Lipid Metabolism	1.18E-03-1.1E-02	ADM,LIPA,NAAA,AKR1C3,THBS1,CYP2U1,COMT,CAT,LSS,FABP3,FAS
Molecular Transport	1.18E-03-1.1E-02	THBS1,BDNF,MAP3K5 (includes EG:4217),FAS,SSPN,TGFBR2,HMOX1,COMT,CDKN1A,CAT,FABP3,SERPINE1,PTGER4
Respiratory Disease	1.18E-03-1.1E-02	IGFBP6,RAB32,P4HB,THBS1,BDNF,MMP14,ITGA2,ANTXR1,IL15,PDGFC,FAS,CTSZ (includes EG:1522),TGFBR2,HMOX1,CDKN1A,CFLAR,SERPINE1,ADAM9,ITGA4
Cell-mediated Immune Response	1.67E-03-1.1E-02	MME,THBS1,MMP14,ITGA2,IL15,TAP1,FAS,TGFBR2,HMOX1,HLA-E,STEAP2,CDKN1A,MMP11,CXCL2,PTGER4,CD151,ITGA4
Organismal Injury and Abnormalities	1.7E-03-1.1E-02	PSMB9,BDNF,C1S,MMP14,ITGA2,PDGFC,CXCL6,FAS,C1R,TGFBR2,COL1A1,CDKN1A,LAMP1,SERPINE1,ITGA4
Carbohydrate Metabolism	1.75E-03-1.1E-02	TGFBR2,CAT,PTGER4
Free Radical Scavenging	2.23E-03-7E-03	HMOX1,CAT,CDKN1A,MAP3K5 (includes EG:4217),FAS,SSPN
Hematopoiesis	2.44E-03-1.1E-02	IL15,FAS,PRKD1,PTGER4,ITGA4
Nucleic Acid Metabolism	3.15E-03-1.1E-02	ADM,HMOX1,AK5,CAT,GUCY1B3
DNA Replication, Recombination, and Repair	3.15E-03-1.1E-02	ADM,IGFBP4,COL14A1,BDNF,ANTXR1,TFPI2,FAS,FOXL2,ZMAT3,COMT,CDKN1A,CAT,PDGFD,PRKD1,GUCY1B3
Drug Metabolism	4.27E-03-1.1E-02	ADM,AKR1C3,BDNF,COMT,SERPINE1
Behavior	5.11E-03-5.11E-03	BDNF,COMT
Hair and Skin Development and Function	5.11E-03-5.11E-03	ITGA2,ANTXR1
Infectious Disease	5.11E-03-5.11E-03	C1R,C1S
Inflammatory Response	5.8E-03-1.1E-02	MME,THBS1,MMP14,ITGA2,PDGFC,CXCL6,FAS,TGFBR2,HMOX1,STEAP2,MMP11,SERPINE1,CXCL2,PTGER4,ITGA4
Organ Development	5.8E-03-1.1E-02	ADAMTS1,BDNF,MMP14,CAT,ROBO2,SERPINE1
Endocrine System Development and Function	6.2E-03-1.1E-02	ADM,AKR1C3,BDNF,COMT
Hepatic System Disease	7E-03-1.1E-02	LIPA,AKR1C3,CDKN1A,CAT,CFLAR,HSD3B7,FAS,ATP8B1
Antigen Presentation	7.39E-03-1.1E-02	TGFBR2,MME,HMOX1,THBS1,STEAP2,MMP14,MMP11,CXCL2,PDGFC,FAS,PTGER4,ITGA4
Humoral Immune Response	7.39E-03-7.5E-03	TGFBR2,MME,HMOX1,THBS1,STEAP2,MMP14,MMP11,CXCL2,FAS,PTGER4,ITGA4
Reproductive System Development and Function	7.39E-03-1.1E-02	ITGA2,ITGA4
Protein Degradation	7.78E-03-7.78E-03	MME,CTSZ (includes EG:1522),CTSO,MMP14,MMP11,SERPINE1,ADAMTS5
Lymphoid Tissue Structure and Development	8.31E-03-1.1E-02	IL15,MMP11,SERPINE1,GUCY1B3
Cellular Function and Maintenance	1.1E-02-1.1E-02	SULF1,BDNF,HLA-E,CDKN1A,FBLN1,FAS
Digestive System Development and Function	1.1E-02-1.1E-02	ADM,BDNF
Endocrine System Disorders	1.1E-02-1.1E-02	ADM
Gene Expression	1.1E-02-1.1E-02	LMCD1
Hypersensitivity Response	1.1E-02-1.1E-02	ITGA4
Metabolic Disease	1.1E-02-1.1E-02	GBE1
Ophthalmic Disease	1.1E-02-1.1E-02	FOXL2,BDNF,GPNMB
Organismal Development	1.1E-02-1.1E-02	ADM,MMP14
Organismal Functions	1.1E-02-1.1E-02	BDNF
Respiratory System Development and Function	1.1E-02-1.1E-02	TGFBR2,HMOX1
Visual System Development and Function	1.1E-02-1.1E-02	BDNF,SERPINE1
Vitamin and Mineral Metabolism	1.1E-02-1.1E-02	NAAA

## Sheet: S3-D1
Table S3-D1. Functional analysis of the upregulated genes in iPS-hKT designating a unique hiPSC state
Category	P-value	Molecules
Neurological Disease	4.59E-07-1.43E-02	DAB1,TUBB4,ZMAT1,ESRRG,GAL,JARID2,CALB1,CHRNA3,FAM124A,NETO1,NOVA1,LPHN3,RHOBTB3,ENPP5,FAM133A,IGFBP5,CACNA1A,NRXN1,HLA-DQB1,RASGRF2,CDH2,COLEC12,MCHR1,DTNA,BBS9,CYP2B6,GNG2,ALOX5,MME,CTNND2,FGF2,PTN,TAC1,DCLK1,ARRB1,PDGFRA,ST8SIA2,CACNB2,CCKBR,PRPH,CACNA1D,ANGPT1,COCH,DLG3,PTPRD,LMO3,BMP7,DCX,NCAM1,RTN1,NPPB,SLC35F1,SH3GL2,GPC3,CDON,LPL,EPHA7,NOX4,SPP1,MYEF2,RAB3A,COL2A1,ST6GALNAC3,CNTNAP2,GNAZ,…
Cell-To-Cell Signaling and Interaction	1.03E-06-1.43E-02	MME,CTNND2,SULF1,FGF2,MMP16,PTN,CLU,JAM2,NTS,NPPB,TAC1,DAB1,GPC3,GAL,SDC2,ITGA9,CDON,PCDH10,LPL,MUC4,CACNB2,PCDH8,CALB1,CHRNA3,CCKBR,TEK,TTYH1,NOVA1,SPP1,ANGPT1,RAB3A,IGFBP5,KIF5A,CALCA,CACNA1A,NRXN1,RASGRF2,NPFFR2,CDH2,GABRG2,TJP3,DTNA,SLC1A2,BMP7,GAP43,DOCK3,NCAM1
Cellular Growth and Proliferation	1.03E-06-1.43E-02	FGF2,PTN,NTS,CLU,TAC1,GPC3,IGF2BP1,ESRRG,PTPRO,SDC2,PRRX1,CDON,MYB (includes EG:4602),PDGFRA,MUC4,ENPP2,GNG4,TEK,CCKBR,NOX4,SPP1,CACNA1D,ANGPT1,IGFBP5,MBD2,CALCA,STC1,CDH2,LMO3,DLK1,RASSF4,BMP7,GAP43,CYP2B6,ALOX5,DCX,NCAM1
Nervous System Development and Function	1.03E-06-1.43E-02	MME,CTNND2,SULF1,FGF2,PTN,EFHD1,NTS,CLU,TAC1,DAB1,MPPED2 (includes EG:744),DCLK1,ROR2,GABRB3,GAL,CDON,ST8SIA2,CACNB2,PCDH8,CALB1,CHRNA3,PRPH,ZDHHC15,SYT4,THBS4,SPP1,NOVA1,EDNRB,ANGPT1,RAB3A,TRPA1,GNAZ,SOX11,KIF5A,CALCA,CACNA1A,NRXN1,GABRG2,CDH2,PTPRD,FUT9,SLC1A2,DTNA,BMP7,GAP43,DCX,NCAM1
Cardiovascular Disease	1.85E-06-1.43E-02	SLC35F1,NPPB,SH3GL2,DAB1,TUBB4,RNF182,ESRRG,SNRPN,PTPRO,LPL,JARID2,CHRNA3,TEK,FAM19A4,EPHA7,NOX4,SPP1,LPHN3,HIF3A,COL2A1,ST6GALNAC3,CNTNAP2,CACNA1A,NRXN1,COLEC12,DLK1,ZBTB46,DTNA,GPM6A,ADAMTS12,GNG2,ERC2,SULF1,CTNND2,FGF2,CLU,TAC1,DCLK1,MPPED2 (includes EG:744),GABRB3,FXYD6,ADAMTS19,SORBS1,GPR158,PDGFRA,CACNB2,CACNA2D3,ZDHHC15,PPP1R9A,VWDE,CACNA1D,EDNRB,PDE4C,ANGPT1,SH3GL3,SNTB1,TPK1,NPFFR2,GABRG…
Genetic Disorder	1.85E-06-1.43E-02	SULT1C2,TUBB4,DAB1,ZMAT1,ESRRG,GAL,PTPRO,JARID2,CALB1,FAM124A,CHRNA3,PELI2,NETO1,LPHN3,RHOBTB3,TSPAN2,ENPP5,IGFBP5,FAM133A,MBD2,CACNA1A,NRXN1,HLA-DQB1,RASGRF2,COLEC12,CDH2,ANO5,MCHR1,ZBTB46,BBS9,DTNA,GPM6A,GNG2,ALOX5,MME,CTNND2,FGF2,CLCNKB,PTN,TAC1,PLCH1,IGFBPL1,DCLK1,MPPED2 (includes EG:744),ARRB1,ADAMTS19,SORBS1,PDGFRA,ST8SIA2,CACNB2,CCKBR,PRPH,CACNA1D,ANGPT1,SH3GL3,FAM3B,COCH,TPK1,DLG3,PTPRD,K…
Endocrine System Disorders	2.08E-06-1.43E-02	DNMT3A,MMP16,SLC35F1,SH3GL2,DAB1,SNRPN,ESRRG,GAL,PTPRO,LPL,JARID2,C3ORF15,CALB1,CHRNA3,FAM19A4,PELI2,NETO1,NOX4,SPP1,RAB3A,TSPAN2,MBD2,CNTNAP2,CACNA1A,NRXN1,HLA-DQB1,CDH2,COLEC12,MCHR1,NUP210,DTNA,BBS9,GPM6A,ADAMTS12,GNG2,DOCK3,ERC2,SULF1,FGF2,DYNC1I1,PTN,CLU,FAT3,NTS,PLCH1,IGFBPL1,DCLK1,ROR2,GLCCI1,GABRB3,KCNT2,SORBS1,GPR158,MUC4,CACNB2,CACNA2D3,KIAA1211,CACNA1D,PDE4C,EDNRB,SHANK2,SH3GL3,SNTB1,T…
Metabolic Disease	2.08E-06-1.43E-02	DNMT3A,MMP16,SLC35F1,SH3GL2,DAB1,ESRRG,SNRPN,GAL,PTPRO,LPL,JARID2,C3ORF15,CALB1,CHRNA3,PELI2,FAM19A4,NETO1,NOX4,SPP1,RAB3A,TSPAN2,IGFBP5,MBD2,CNTNAP2,CACNA1A,NRXN1,HLA-DQB1,COLEC12,DLK1,MCHR1,NUP210,BBS9,DTNA,GPM6A,ADAMTS12,GNG2,DOCK3,ERC2,SULF1,DYNC1I1,CLU,FAT3,NTS,TAC1,PLCH1,IGFBPL1,DCLK1,ROR2,GLCCI1,GABRB3,KCNT2,SORBS1,GPR158,CACNB2,CACNA2D3,CCKBR,KIAA1211,CACNA1D,EDNRB,PDE4C,SHANK2,SH3GL3,SNT…
Immunological Disease	5.11E-06-1.43E-02	SLC35F1,SH3GL2,TUBB4,DAB1,ESRRG,SNRPN,PTPRO,MYB (includes EG:4602),JARID2,C3ORF15,FAM124A,TEK,PELI2,FAM19A4,RALYL,NETO1,SPP1,LPHN3,COL2A1,TSPAN2,ENPP5,CNTNAP2,CACNA1A,NRXN1,HLA-DQB1,CDH2,CHST9,GNG2,ALOX5,DOCK3,DPP10,ERC2,MME,SULF1,FRZB,GALNTL1,FGF2,CLU,TAC1,PLCH1,DCLK1,MPPED2 (includes EG:744),ROR2,GABRB3,ARRB1,PADI2,GPR158,ENPP4,PDGFRA,CACNB2,ENPP2,GNG4,CACNA2D3,PPP1R9A,EDNRB,PDE4C,ANGPT1,SH3GL3…
Connective Tissue Disorders	1.2E-05-1.43E-02	MMP16,SH3GL2,TUBB4,DAB1,ESRRG,JARID2,FAM124A,FAM19A4,NETO1,SPP1,LPHN3,COL2A1,TSPAN2,ENPP5,CNTNAP2,CACNA1A,HLA-DQB1,CDH2,CHST9,ADAMTS12,GNG2,ALOX5,DPP10,MME,SULF1,FRZB,GALNTL1,FGF2,CLU,TAC1,MPPED2 (includes EG:744),DCLK1,ROR2,GABRB3,ADAMTS19,PADI2,ENPP4,CACNB2,ENPP2,CACNA2D3,PPP1R9A,PDE4C,ANGPT1,EDNRB,KIF5A,GABRG2,KLHL14,SLC1A2,GAP43,TCF7L2 (includes EG:6934),SALL4
Inflammatory Disease	1.2E-05-1.43E-02	DNMT3A,MMP16,SLC35F1,NPPB,SH3GL2,DAB1,TUBB4,ESRRG,SNRPN,JARID2,FAM124A,TEK,FAM19A4,NETO1,SPP1,LPHN3,COL2A1,ST6GALNAC3,TSPAN2,ENPP5,CNTNAP2,CACNA1A,HLA-DQB1,COLEC12,CDH2,CHST9,ZBTB46,DTNA,ADAMTS12,GNG2,ALOX5,DPP10,ERC2,MME,CTNND2,SULF1,FRZB,GALNTL1,FGF2,DYNC1I1,CLU,TAC1,MPPED2 (includes EG:744),DCLK1,GABRB3,ARRB1,PADI2,ENPP4,GPR158,PDGFRA,CACNB2,ENPP2,CACNA2D3,KIAA1211,PPP1R9A,CACNA1D,ANGPT1,PDE4C…
Skeletal and Muscular Disorders	1.2E-05-1.43E-02	MMP16,NPPB,SH3GL2,GPC3,TUBB4,DAB1,ESRRG,GAL,LPL,JARID2,CALB1,FAM124A,FAM19A4,NETO1,SPP1,MYEF2,RAB3A,LPHN3,RHOBTB3,COL2A1,ST6GALNAC3,TSPAN2,ENPP5,FAM133A,CNTNAP2,CACNA1A,NRXN1,HLA-DQB1,KPNA5,CDH2,CHST9,DTNA,ADAMTS12,GNG2,ALOX5,SYNPR,DPP10,MME,CTNND2,SULF1,FRZB,GALNTL1,FGF2,SLC35D3,DYNC1I1,CLU,TAC1,DCLK1,MPPED2 (includes EG:744),ROR2,GABRB3,ARRB1,PADI2,ENPP4,ST8SIA2,CACNB2,ENPP2,CACNA2D3,CCKBR,PPP1…
Behavior	5.5E-05-1.43E-02	MME,CTNND2,NOVA1,SPP1,PTN,NTS,TRPA1,TAC1,MBD2,SOBP,CACNA1A,CALCA,GABRB3,GABRG2,ARRB1,PTPRD,GAL,MCHR1,SLC1A2,CALB1,CHRNA3,CCKBR
Psychological Disorders	5.75E-05-7.42E-03	SULF1,RTN1,FAT3,TAC1,SLC35F1,TUBB4,DAB1,ESRRG,GLCCI1,GABRB3,GAL,FXYD6,SDC2,GPR158,JARID2,ST8SIA2,ENPP2,CACNB2,CHRNA3,CACNA2D3,CCKBR,KIAA1211,LPHN3,ST6GALNAC3,CNTNAP2,GNAZ,DLG3,CALCA,NRXN1,CDH2,GABRG2,MCHR1,BBS9,SLC1A2,DTNA,GAP43,DOCK3,SYNPR,DPP10,NCAM1
Cell Cycle	6.48E-05-1.43E-02	SULF1,SPP1,ANGPT1,FGF2,PTN,TAC1,IGFBP5,ESRRG,ARRB1,JARID2,PDGFRA,MYB (includes EG:4602),BMP7,DCX
Cellular Movement	6.68E-05-1.43E-02	MME,CTNND2,SULF1,FGF2,MMP16,PTN,CLU,NTS,TAC1,NPPB,DAB1,IGF2BP1,DCLK1,ARRB1,ITGA9,SDC2,PTPRO,PCDH10,PDGFRA,ST8SIA2,MUC4,ENPP2,TEK,THBS4,SPP1,ANGPT1,EDNRB,IGFBP5,GNAZ,CALCA,STC1,CDH2,SEMA6D,SLC1A2,BMP7,GAP43,ALOX5,DCX,NCAM1
Tissue Development	6.86E-05-1.43E-02	MME,CTNND2,FGF2,MMP16,PTN,JAM2,CLU,NPPB,TAC1,DAB1,GPC3,ROR2,SDC2,ITGA9,PRRX1,CDON,PCDH10,PDGFRA,MUC4,ENPP2,PCDH8,CCKBR,TEK,EPHA7,TTYH1,NOX4,CACNA1D,SPP1,ANGPT1,SPRY1,COL2A1,IGFBP5,GNAZ,CALCA,STC1,RASGRF2,CDH2,DLK1,PDLIM3,BMP7,GAP43,DOCK3,IGSF10,TCF7L2 (includes EG:6934),SALL4,NCAM1
Embryonic Development	1.13E-04-1.43E-02	EDNRB,ANGPT1,FGF2,SPRY1,NPPB,IGFBP5,CALCA,ROR2,CDH2,ITGA9,BMP7,ENPP2,TCF7L2 (includes EG:6934),NCAM1
Cancer	1.59E-04-1.43E-02	SULT1C2,ZNF138,NLRP7,RTN1,MMP16,GYG2,GPC3,DAB1,TUBB4,ESRRG,GAL,PTPRO,ITGA9,LPL,NPTX2,MYB (includes EG:4602),CALB1,FAM124A,CHRNA3,TEK,SPP1,MYEF2,RAB3A,TSPAN12,HIF3A,COL2A1,IGFBP5,GNAZ,CNTNAP2,MBD2,CRABP1,CACNA1A,RASGRF2,COLEC12,CDH2,TJP3,PDLIM3,DLK1,RASSF4,DTNA,GPM6A,CYP2B6,ALOX5,MME,SULF1,FRZB,FGF2,PTN,NTS,CLU,IGF2BP1,GABRB3,SERPINB9,ARRB1,SDC2,PRRX1,PCDH10,PDGFRA,ST8SIA2,MUC4,ENPP2,GNG4,CACNA2D3…
Cardiovascular System Development and Function	1.65E-04-1.43E-02	MME,SPP1,EDNRB,ANGPT1,FGF2,PTN,NTS,NPPB,TAC1,CALCA,STC1,CDH2,GAL,SDC2,ITGA9,PRRX1,LPL,PDGFRA,ENPP2,BMP7,ALOX5,TEK
Tissue Morphology	1.65E-04-1.43E-02	SPP1,ANGPT1,EDNRB,FGF2,PTN,COL2A1,NPPB,TAC1,IGFBP5,CALCA,CDH2,GAL,PRRX1,PDGFRA,BMP7,TEK,NCAM1
Connective Tissue Development and Function	2.04E-04-1.43E-02	NOX4,SPP1,ANGPT1,FGF2,PTN,NPPB,TAC1,IGFBP5,CALCA,STC1,CDH2,DLK1,ITGA9,SORBS1,PCDH10,PRRX1,PDGFRA,ENPP2,BMP7,GAP43,PCDH8,DOCK3
Dermatological Diseases and Conditions	3.22E-04-1.43E-02	CDH2,GAL,TAC1,GAP43,CALCA
Organismal Injury and Abnormalities	3.22E-04-1.43E-02	CACNA1D,PDE4C,CLU,TAC1,CR1L,TUBB4,CACNA1A,CALCA,GABRG2,GABRB3,GAL,LPL,PRKAA2,SLC1A2,CACNB2,BMP7,ALOX5,CACNA2D3,CCKBR
Cell Signaling	4.38E-04-1.43E-02	FGF2,SEMA6A,PTN,NTS,TAC1,ARRB1,CDON,PRRX1,PDGFRA,MYB (includes EG:4602),CACNB2,CACNA2D3,TEK,CACNA1D,ANGPT1,TRPA1,GNAZ,CACNA1A,CALCA,STC1,PTPRD,MCHR1,BMP7,GAP43,NCAM1
Vitamin and Mineral Metabolism	4.38E-04-1.43E-02	CACNA1D,FGF2,LPL,NTS,MYB (includes EG:4602),TRPA1,CACNB2,CACNA2D3,CALCA,CACNA1A
Cell Morphology	5.05E-04-1.43E-02	SULF1,FGF2,DCLK1,ROR2,SORBS1,ITGA9,RHOU,CHRNA3,TEK,PPP1R9A,PRPH,NOX4,SPP1,EDNRB,ANGPT1,AP1S2,KIF5A,CACNA1A,CDH2,DLK1,DTNA,BMP7,GAP43,DOCK3,DCX,NCAM1
Cellular Assembly and Organization	5.05E-04-1.43E-02	MME,CTNND2,SULF1,FGF2,PTN,EFHD1,CLU,NTS,NPPB,TAC1,DCLK1,ROR2,GAL,SDC2,RHOU,PCDH8,CHRNA3,RND2,ZDHHC15,PPP1R9A,PRPH,TTYH1,THBS4,RAB3A,COL2A1,KIF5A,CALCA,CACNA1A,STC1,CDH2,DTNA,GPM6A,BMP7,GNG2,GAP43,DCX,NCAM1
Cell Death	5.52E-04-1.43E-02	MME,PRPH,EPHA7,SPP1,NOVA1,ANGPT1,FGF2,PTN,NTS,CLU,TAC1,SH3GL2,CACNA1A,CDH2,GAL,MYB (includes EG:4602),SLC1A2,BMP7,CALB1
Respiratory Disease	5.52E-04-1.43E-02	GAL,EDNRB,ANGPT1,FGF2,NTS,PDGFRA,NPPB,NCAM1
DNA Replication, Recombination, and Repair	6.06E-04-8.48E-03	SPP1,FGF2,NTS,CLU,TAC1,IGFBP5,CALCA,ARRB1,SDC2,INHBE,PDGFRA,BMP7,ALOX5
Skeletal and Muscular System Development and Function	6.06E-04-1.43E-02	NOX4,SPP1,FRZB,FGF2,PTN,NTS,CLU,COL2A1,NPPB,TAC1,IGFBP5,CACNA1A,CALCA,STC1,ROR2,DLK1,PRRX1,MYB (includes EG:4602),PDGFRA,BMP7,CALB1,NCAM1
Small Molecule Biochemistry	6.06E-04-1.43E-02	SULT1C2,FGF2,NTS,NPPB,TAC1,AGTPBP1,ARRB1,GAL,LPL,PDGFRA,CHRNA3,TEK,SYT4,RAB3A,EDNRB,AFP,GNAZ,CACNA1A,CALCA,NRXN1,STC1,MCHR1,SLC1A2,BMP7,CYP2B6,GAP43,ALOX5,SLC7A3,ERC2
Gastrointestinal Disease	6.58E-04-1.43E-02	SULT1C2,DNMT3A,RTN1,SLC35F1,GYG2,DAB1,TUBB4,ESRRG,SNRPN,NPTX2,TEK,SPP1,RAB3A,MYEF2,COL2A1,IGFBP5,CNTNAP2,COLEC12,CDH2,TJP3,PDLIM3,ZBTB46,DTNA,GPM6A,ADAMTS12,GNG2,ALOX5,DPP10,ERC2,MME,CTNND2,FGF2,SEMA6A,DYNC1I1,CLU,SDC2,PRRX1,ENPP4,GPR158,PDGFRA,CACNB2,ENPP2,CACNA2D3,KIAA1211,CCKBR,CACNA1D,PDE4C,EDNRB,COCH,CALCA,CLGN,SLC1A2,BMP7
Hematological System Development and Function	7.43E-04-1.43E-02	MME,SPP1,DLK1,FGF2,PDGFRA,TAC1,CALCA,TEK
Reproductive System Disease	9.12E-04-1.43E-02	ZNF138,FGF2,NTS,CLU,TUBB4,IGF2BP1,ESRRG,GABRB3,SERPINB9,ARRB1,ITGA9,PDGFRA,CHRNA3,SPP1,ANGPT1,EDNRB,TSPAN12,IGFBP5,CALCA,CACNA1A,RASGRF2,GABRG2,CDH2,WFDC2,DTNA,BMP7,GPM6A,SLC7A3,DCX,NCAM1
Hepatic System Disease	9.36E-04-1.43E-02	SPP1,FGF2,LPL,GPC3
Drug Metabolism	1.2E-03-1.43E-02	STC1,SULT1C2,SYT4,GAL,FGF2,NTS,TAC1,NPPB,BMP7,AFP,CYP2B6
Endocrine System Development and Function	1.2E-03-1.43E-02	STC1,CACNA1D,ARRB1,GAL,FGF2,CLU,TAC1,NPPB,BMP7,AFP,CCKBR,NCAM1
Hair and Skin Development and Function	1.2E-03-1.43E-02	SPP1,FGF2,GAP43
Molecular Transport	1.2E-03-1.43E-02	FGF2,NTS,TAC1,ARRB1,GAL,LPL,MYB (includes EG:4602),PDGFRA,CACNB2,CACNA2D3,TEK,SYT4,CACNA1D,RAB3A,TRPA1,AFP,GNAZ,CACNA1A,CALCA,NRXN1,STC1,MCHR1,SLC1A2,BMP7,GAP43,ERC2
Developmental Disorder	1.6E-03-1.43E-02	CTNND2,FGF2,GPC3,DAB1,IGF2BP1,SNRPN,ROR2,GABRB3,GAL,SP8,PDGFRA,CCKBR,ZDHHC15,NOX4,ANGPT1,AP1S2,COL2A1,STC1,GABRG2,DLK1,BBS9,BMP7,GAP43,DCX,SALL4
Cellular Development	1.86E-03-1.43E-02	STC1,SPP1,FGF2,PRRX1,PTN,CLU,IGFBP5,CCKBR,NCAM1
Amino Acid Metabolism	1.98E-03-1.43E-02	GAL,EDNRB,FGF2,NTS,TAC1,SLC1A2,SLC7A3,NRXN1
Infectious Disease	1.98E-03-1.98E-03	HLA-DQB1,CLU
Inflammatory Response	1.98E-03-6.87E-03	FGF2,COL2A1,TAC1
Reproductive System Development and Function	1.98E-03-1.43E-02	YBX2,GABRB3,FGF2,PTN,CLU,TAC1,AFP,SEMG1 (includes EG:6406),BMP7,MBD2,CALCA
Tumor Morphology	2.05E-03-1.43E-02	MME,CDH2,FGF2,DLK1,CLU,ENPP2,MBD2,GPC3,CALCA,TEK,IGF2BP1
Cellular Function and Maintenance	4.08E-03-1.43E-02	STC1,SULF1,PTPRD,FGF2,BMP7,GAP43,CALB1,CACNA1A
Digestive System Development and Function	4.08E-03-1.43E-02	PDGFRA,TAC1,TCF7L2 (includes EG:6934),CALCA,IGF2BP1
Renal and Urological Disease	4.08E-03-1.43E-02	SPP1,EDNRB,FGF2,CLCNKB,HIF3A,CLU,PDGFRA,BMP7,GPC3,TUBB4,DAB1,CHRNA3
Lipid Metabolism	4.15E-03-1.43E-02	STC1,GAL,FGF2,LPL,PDGFRA,TAC1,NPPB,BMP7,AFP,ALOX5,TEK
Cellular Compromise	4.16E-03-1.43E-02	RASGRF2,SPP1,ANGPT1,FGF2,CLU,SLC1A2
Carbohydrate Metabolism	5.04E-03-5.04E-03	SPP1,GAL,FGF2,LPL,NTS,ENPP2,GNG2
Nucleic Acid Metabolism	5.63E-03-1.43E-02	ARRB1,FGF2,MCHR1,TAC1,BMP7,GAP43,GNAZ,CALCA
Gene Expression	6.56E-03-1.43E-02	FGF2,PRRX1,GNG2
Organismal Survival	6.87E-03-1.06E-02	MME,FGF2,LPL,MYB (includes EG:4602),TAC1,SLC1A2,NPPB,IGF2BP1
Organismal Development	8.5E-03-1.43E-02	ROR2,CDH2,SP8
Ophthalmic Disease	1.03E-02-1.43E-02	ANGPT1,DLK1,FGF2,PDGFRA
Renal and Urological System Development and Function	1.22E-02-1.43E-02	CTNND2,FGF2,SORBS1,GAP43
Cell-mediated Immune Response	1.43E-02-1.43E-02	DLK1,CALB1
Energy Production	1.43E-02-1.43E-02	STC1
Free Radical Scavenging	1.43E-02-1.43E-02	CLU
Hematological Disease	1.43E-02-1.43E-02	MYB (includes EG:4602)
Hematopoiesis	1.43E-02-1.43E-02	DLK1,FGF2
Lymphoid Tissue Structure and Development	1.43E-02-1.43E-02	ROR2,DLK1,FGF2
Organ Development	1.43E-02-1.43E-02	GAP43,DAB1
Organ Morphology	1.43E-02-1.43E-02	TAC1,GAP43,CCKBR,IGF2BP1
Post-Translational Modification	1.43E-02-1.43E-02	NTS,MUC4
Protein Degradation	1.43E-02-1.43E-02	LPL
Protein Synthesis	1.43E-02-1.43E-02	SLC7A3
Visual System Development and Function	1.43E-02-1.43E-02	FGF2

## Sheet: S3-D2
Table S3-D2. Functional analysis of the downregulated genes in iPS-hKT designating a unique hiPSC state
Category	P-value	Molecules
Dermatological Diseases and Conditions	1.43E-09-6.47E-03	KRT6B,KRT17,GJB3,PERP,SERPINB3,TUBA4A,ITGA6,SAT1,PLAUR,CDSN,ITGA3,HR,SLPI,EFNA1,DSG3,KRT5,KRT2,PLAU,ITGB4,MMP9,DSP,EGFR,COL7A1
Genetic Disorder	4.19E-08-1.13E-02	FLNB,KRT7,GJB3,CA12,SAT1,SLC35C1,GPC1,LYST,KRT2,ITGB4,DSC2,DSP,EGFR,PRNP,KRT17,THBS1,PCSK9,DST,ITGA6,TUBA4A,CDSN,IRF6,LDLR,KRT5,MYH9,PLAU,MMP9,COL7A1
Hair and Skin Development and Function	5.96E-08-1.29E-02	ASPRV1,KRT17,ITGA6,PLAUR,CDSN,ITGA3,HR,KLK8,EFNA1,IRF6,DSG3,KRT5,KLK5,KRT2,PLAU,ITGB4,GJB5,SEMA3F,DSP,EGFR,COL7A1
Organ Development	5.96E-08-1.29E-02	ASPRV1,KRT17,THBS1,GJB3,SAT1,ITGA6,CDSN,HR,ITGA3,EFNA1,IRF6,WNT7A,KRT5,HOXC11,KLK5,FOSL2,KRT2,LTBR,GJB5,DSP,MMP9,EGFR,COL7A1
Cell-To-Cell Signaling and Interaction	2.38E-07-1.29E-02	SLPI,DSG3,GPC1,LYST,WNT7A,KRT2,LTBR,ITGB4,DSC2,SEMA3F,TNFRSF10A (includes EG:8797),EGFR,PRNP,ARTN,THBS1,PCSK9,ITGA6,SERPINB3,PERP,PLAUR,CDSN,ITGA3,KLK8,EFNA1,LDLR,DAPP1,LGALS3BP,MYH9,PLAU,MMP9,COL7A1
Cancer	9.96E-07-1.29E-02	KRT7,TMEM173,SAT1,SLPI,EPPK1,AQP3,GPC1,KLK11,WNT7A,LTBR,ITGB4,TNFRSF10A (includes EG:8797),SEMA3F,TACSTD2,PRNP,EGFR,FSTL3,THBS1,PCSK9,DST,ITGA6,PERP,TUBA4A,SERPINB3,PLAUR,HR,ITGA3,CPA4,EFNA1,LGALS3BP,PTK6,SPRR2G (includes EG:6706),MYH9,TSPO,PLAU,MMP9,COL7A1
Cellular Movement	2.52E-06-1.18E-02	FLNB,ARTN,THBS1,SERPINB3,ITGA6,PLAUR,SLPI,ITGA3,EFNA1,LYST,LDLR,PTK6,FOSL2,MYH9,LTBR,ITGB4,PLAU,SEMA3F,MMP9,COL7A1,EGFR,PRNP
Tumor Morphology	3.14E-06-7.3E-03	THBS1,SAT1,ITGA6,PLAUR,ITGB4,PLAU,MMP9,EFNA1,EGFR
Organismal Injury and Abnormalities	3.76E-06-1.04E-02	DSG3,LDLR,THBS1,SERPINB3,PLAUR,LTBR,PLAU,SLPI,DSP,MMP9,EGFR
Cell Cycle	4.69E-06-1.29E-02	GPC1,PLAUR,ITGB4,PLAU,MMP9,PRNP,EGFR
Neurological Disease	4.69E-06-1.29E-02	DST,GJB3,CA12,PLAUR,GPC1,TSPO,MYH9,PLAU,LTBR,SEMA3F,MMP9,EGFR,PRNP
Cellular Function and Maintenance	5.17E-06-1.29E-02	THBS1,KRT17,ITGA6,MYH9,PLAUR,PLAU,ITGB4,ITGA3,DSP,EFNA1
Cardiovascular System Development and Function	1.26E-05-1E-02	GPC1,THBS1,ITGA6,MYH9,PLAUR,LTBR,PLAU,ITGA3,SEMA3F,MMP9,EFNA1
Immune Cell Trafficking	1.28E-05-7.3E-03	THBS1,SERPINB3,ITGA6,PLAUR,SLPI,ITGA3,LYST,LDLR,PLAU,LTBR,TNFRSF10A (includes EG:8797),MMP9,PRNP,EGFR
Cellular Assembly and Organization	1.32E-05-1.29E-02	STON2,ARTN,KRT17,THBS1,DST,ITGA6,PLAUR,ITGA3,KLK8,EFNA1,DSG3,WNT7A,BAIAP2,MYH9,ITGB4,PLAU,SEMA3F,DSP,EGFR,PRNP
Nervous System Development and Function	1.32E-05-1.29E-02	ARTN,THBS1,DST,ITGA6,ITGA3,KLK8,EFNA1,WNT7A,BAIAP2,PTK6,MYH9,PLAU,ITGB4,SEMA3F,EGFR,PRNP
Cellular Growth and Proliferation	1.94E-05-1.24E-02	SAT1,SLPI,GPC1,DSG3,WNT7A,KRT2,FOSL2,LTBR,ITGB4,SEMA3F,TNFRSF10A (includes EG:8797),TACSTD2,PRNP,EGFR,FSTL3,ARTN,THBS1,ITGA6,PLAUR,ITGA3,HR,KLK8,EFNA1,IRF6,LDLR,PTK6,MYH9,TSPO,PLAU,MMP9
Tissue Development	2.19E-05-1.29E-02	FLNB,SLPI,DSG3,WNT7A,FOSL2,LTBR,ITGB4,DSC2,SEMA3F,EGFR,KRT6B,KRT17,THBS1,ITGA6,PERP,PLAUR,CDSN,ITGA3,IRF6,LDLR,LGALS3BP,HOXC11,MYH9,PLAU,MMP9,COL7A1
Hematological Disease	2.5E-05-8.03E-03	LYST,THBS1,ITGA6,MYH9,PLAUR,LTBR,PLAU,ITGA3
Skeletal and Muscular System Development and Function	3.05E-05-1.29E-02	LDLR,THBS1,ITGA6,MYH9,FOSL2,PLAUR,PLAU,TNFRSF10A (includes EG:8797),MMP9,EGFR
Cardiovascular Disease	4.14E-05-1.29E-02	LDLR,THBS1,PCSK9,LTBR,PLAU,TMBIM1,DSC2,DSP,MMP9
Cell Morphology	4.14E-05-1.29E-02	THBS1,KRT17,DST,ITGA6,PLAUR,ITGA3,EFNA1,AQP3,BAIAP2,SPRR2G (includes EG:6706),KRT2,MYH9,PLAU,ITGB4,SEMA3F,MMP9,PRNP,EGFR
Embryonic Development	4.14E-05-6.47E-03	IRF6,WNT7A,KRT6B,THBS1,HOXC11,ITGA6,PLAUR,FOSL2,PLAU,ITGA3,MMP9,EGFR
Reproductive System Disease	4.17E-05-1.29E-02	FSTL3,THBS1,KRT7,DST,TUBA4A,SAT1,ITGA6,SERPINB3,PLAUR,ITGA3,SLPI,KLK11,GPC1,WNT7A,FOSL2,ITGB4,PLAU,TNFRSF10A (includes EG:8797),MMP9,PRNP,EGFR,COL7A1
Cell Death	5.53E-05-1.29E-02	THBS1,PCSK9,TMEM173,ITGA6,SAT1,SERPINB3,PERP,PLAUR,TRIB3,EFNA1,GPC1,WNT7A,LDLR,LGALS3BP,ITGB4,LTBR,PLAU,TNFRSF10A (includes EG:8797),SEMA3F,MMP9,DSP,EGFR,PRNP
Cellular Development	6.15E-05-1.29E-02	FLNB,THBS1,PCSK9,ITGA6,PLAUR,TRIB3,ITGA3,EFNA1,IRF6,GPC1,WNT7A,BAIAP2,SPRR2G (includes EG:6706),FOSL2,MYH9,ITGB4,LTBR,PLAU,TMBIM1,DSP,MMP9,BMP1,PRNP,EGFR
Connective Tissue Development and Function	1.02E-04-9.32E-03	LDLR,THBS1,ITGA6,PLAUR,PLAU,COL7A1,EGFR,EFNA1
Hematological System Development and Function	1.08E-04-1.29E-02	THBS1,ITGA6,PLAUR,SLPI,ITGA3,LYST,LDLR,MYH9,PLAU,LTBR,TNFRSF10A (includes EG:8797),MMP9,PRNP,EGFR
Inflammatory Response	1.08E-04-6.47E-03	DSG3,LDLR,THBS1,ITGA6,PLAUR,PLAU,SLPI,MMP9
Skeletal and Muscular Disorders	1.13E-04-1.29E-02	FLNB,RNF39,TMEM173,CA12,SAT1,TMPRSS11D,LYST,WNT7A,CDS1,STK10,BAIAP2,ITGB4,LTBR,DSC2,TNFRSF10A (includes EG:8797),DSP,PRNP,BMP1,THBS1,DST,TUBA4A,PLAUR,CDSN,IRF6,AQP9,LDLR,TSPO,MYH9,PLAU,TAP2,MMP9,MCTP2
Gene Expression	1.24E-04-6.47E-03	ITGA6,ITGB4,PRNP
Respiratory Disease	1.24E-04-1.04E-02	THBS1,ITGA6,PLAU,LTBR,SLPI,ITGA3,SEMA3F,MMP9,EGFR
Gastrointestinal Disease	1.38E-04-6.47E-03	KRT7,TUBA4A,SAT1,ITGA6,PLAU,ITGB4,ITGA3,EGFR
Ophthalmic Disease	1.67E-04-6.47E-03	THBS1,TUBA4A,CA12,FOSL2,PLAUR,PLAU,MMP9,TACSTD2,PRNP
Organ Morphology	2.47E-04-1.29E-02	DSG3,ITGA6,PLAUR,PLAU,LTBR,ITGA3,MMP9,EGFR
Cell-mediated Immune Response	2.75E-04-1.29E-02	LDLR,THBS1,ITGA6,MYH9,PLAU,ITGA3,PRNP
Cellular Compromise	6.11E-04-6.88E-03	DSG3,MYH9,ITGA3,EFNA1,PRNP
Developmental Disorder	6.11E-04-6.47E-03	IRF6,FLNB,KRT17,ITGA6,ITGA3,EGFR
Renal and Urological System Development and Function	8.48E-04-1.29E-02	THBS1,ITGA6,SAT1,PLAUR,PLAU,ITGA3,MMP9,EGFR
Metabolic Disease	8.52E-04-3.06E-03	LDLR,THBS1,PCSK9,CA12
Renal and Urological Disease	8.52E-04-1.22E-02	TUBA4A,PLAU,MMP9,EGFR
Organismal Development	9.38E-04-1E-02	IRF6,WNT7A,THBS1,HOXC11,ITGA6,FOSL2,SLC35C1,PLAU,ITGA3,MMP9,EFNA1
Infectious Disease	1.13E-03-6.47E-03	LTBR,PRNP
Reproductive System Development and Function	1.13E-03-6.47E-03	AQP3,WNT7A,ITGA6,SAT1,ITGA3
Visual System Development and Function	1.14E-03-6.47E-03	THBS1,ITGA6,FOSL2,ITGA3,MMP9,EGFR,EFNA1
Lymphoid Tissue Structure and Development	1.45E-03-1.29E-02	THBS1,LTBR,PRNP,EGFR
Tissue Morphology	1.45E-03-8.58E-03	LDLR,THBS1,FOSL2,MYH9,PLAU,LTBR,MMP9,PRNP,EGFR
Carbohydrate Metabolism	1.8E-03-8.95E-03	LDLR,THBS1,SLPI,PRNP
Drug Metabolism	1.8E-03-1.05E-02	GPC1,LDLR,THBS1,EGFR,PRNP
Small Molecule Biochemistry	1.8E-03-1.29E-02	GPC1,AQP9,LDLR,THBS1,SAT1,TSPO,PRNP,EEA1,EGFR
Protein Degradation	2.18E-03-2.18E-03	ASPRV1,PCSK9,MYH9,PLAU,MMP9,BMP1
Endocrine System Disorders	2.62E-03-1.04E-02	SAT1,PLAUR,PLAU,MMP9
Antigen Presentation	3.26E-03-3.26E-03	LTBR,SLPI,TNFRSF10A (includes EG:8797)
Hematopoiesis	3.58E-03-1.29E-02	THBS1,ITGA6,ITGA3,EGFR
Hepatic System Disease	3.58E-03-3.58E-03	PCSK9,SERPINB3
Digestive System Development and Function	3.9E-03-6.47E-03	ITGA6,LTBR,PLAU,EGFR
Connective Tissue Disorders	4.12E-03-1.29E-02	FLNB,RNF39,THBS1,TMEM173,TUBA4A,PLAUR,IRF6,TMPRSS11D,AQP9,WNT7A,LYST,STK10,MYH9,LTBR,PLAU,DSC2,TAP2,MMP9,COL7A1,PRNP,BMP1,MCTP2
Protein Synthesis	4.12E-03-9.64E-03	ASPRV1,LDLR,KRT17,KRT7,THBS1,PCSK9,MYH9,PLAU,MMP9,BMP1,EGFR
Molecular Transport	4.69E-03-1.29E-02	AQP3,AQP9,SAT1,TSPO,EEA1
Auditory Disease	5.29E-03-5.29E-03	GJB3,MYH9
Immunological Disease	5.93E-03-6.47E-03	LYST,LDLR,SLC35C1,LTBR
Antimicrobial Response	6.47E-03-6.47E-03	LDLR,SERPINB3
Behavior	6.47E-03-6.47E-03	PLAU
Cell Signaling	6.47E-03-9.6E-03	THBS1,ITGA6,PTK6,EFNA1,EGFR
DNA Replication, Recombination, and Repair	6.47E-03-6.47E-03	PRNP
Infection Mechanism	6.47E-03-6.47E-03	LDLR,SERPINB3,PRNP
Inflammatory Disease	6.47E-03-1.29E-02	RNF39,THBS1,TMEM173,SAT1,TUBA4A,PLAUR,IRF6,TMPRSS11D,AQP9,LYST,WNT7A,STK10,MYH9,LTBR,PLAU,DSC2,TAP2,MMP9,PRNP,BMP1,MCTP2
Lipid Metabolism	6.47E-03-1.29E-02	GPC1,LDLR,TSPO,EEA1,PRNP,EGFR
Nucleic Acid Metabolism	6.47E-03-6.47E-03	AQP9,EGFR
RNA Post-Transcriptional Modification	6.47E-03-6.47E-03	PRNP
Respiratory System Development and Function	6.47E-03-6.47E-03	MMP9
Organismal Functions	7.2E-03-7.2E-03	PLAU,SLPI,MMP9
Post-Translational Modification	8.03E-03-9.6E-03	LDLR,THBS1,ITGA6,PTK6,GALNT6,EFNA1,EGFR
Protein Trafficking	1.04E-02-1.04E-02	THBS1,PLAUR
